# Supplementary material for: Real-time navigation during hepatectomy using fusion indocyanine green-fluorescence imaging: protocol for a prospective cohort study
Source: PubMed Central journal article supplement — BMJ Open. 2019 Aug 18;9(8):e030233. doi: 10.1136/bmjopen-2019-030233 (PMC6701684; doi:10.1136/bmjopen-2019-030233), 2019-08-18
Supplement: bmjopen-2019-030233.draft_revisions.pdf [file bmjopen-2019-030233.draft_revisions.pdf]

# BMJ Open

BMJ Open is committed to open peer review. As part of this commitment we make the peer review history of every article we publish publicly available.

When an article is published we post the peer reviewers' comments and the authors' responses online. We also post the versions of the paper that were used during peer review. These are the versions that the peer review comments apply to.

The versions of the paper that follow are the versions that were submitted during the peer review process. They are not the versions of record or the final published versions. They should not be cited or distributed as the published version of this manuscript.

BMJ Open is an open access journal and the full, final, typeset and author-corrected version of record of the manuscript is available on our site with no access controls, subscription charges or pay-per-view fees (<http://bmjopen.bmj.com>).

If you have any questions on BMJ Open's open peer review process please email [info.bmjopen@bmj.com](mailto:info.bmjopen@bmj.com)

# BMJ Open

## Real-time navigation during hepatectomy using fusion indocyanine green-fluorescence imaging: protocol for a prospective cohort study

|                               |                                                                                                                                                                                                                                                                                                                                                                                                                                                                                                                                                                                                                                                                                                                                                                                                                                   |
|-------------------------------|-----------------------------------------------------------------------------------------------------------------------------------------------------------------------------------------------------------------------------------------------------------------------------------------------------------------------------------------------------------------------------------------------------------------------------------------------------------------------------------------------------------------------------------------------------------------------------------------------------------------------------------------------------------------------------------------------------------------------------------------------------------------------------------------------------------------------------------|
| Journal:                      | <i>BMJ Open</i>                                                                                                                                                                                                                                                                                                                                                                                                                                                                                                                                                                                                                                                                                                                                                                                                                   |
| Manuscript ID                 | bmjopen-2019-030233                                                                                                                                                                                                                                                                                                                                                                                                                                                                                                                                                                                                                                                                                                                                                                                                               |
| Article Type:                 | Protocol                                                                                                                                                                                                                                                                                                                                                                                                                                                                                                                                                                                                                                                                                                                                                                                                                          |
| Date Submitted by the Author: | 05-Mar-2019                                                                                                                                                                                                                                                                                                                                                                                                                                                                                                                                                                                                                                                                                                                                                                                                                       |
| Complete List of Authors:     | Gon, Hidetoshi; Kobe University Graduate School of Medicine School of Medicine, Surgery;<br>Komatsu, Shohei; Kobe University Graduate School of Medicine School of Medicine<br>Murakami, Sae; Kobe University Hospital,<br>Kido, Masahiro; Kobe University Graduate School of Medicine School of Medicine<br>Tanaka, Motofumi; Kobe University Graduate School of Medicine School of Medicine<br>Kuramitsu, Kaori; Kobe University Graduate School of Medicine School of Medicine<br>Tsugawa, Daisuke; Kobe University Graduate School of Medicine School of Medicine<br>Awazu, Masahide; Kobe University Graduate School of Medicine School of Medicine<br>Toyama, Hirochika; Kobe University Graduate School of Medicine School of Medicine<br>Fukumoto, Takumi; Kobe University Graduate School of Medicine School of Medicine |
| Keywords:                     | indocyanine green-fluorescence imaging, liver tumour, hepatectomy                                                                                                                                                                                                                                                                                                                                                                                                                                                                                                                                                                                                                                                                                                                                                                 |
|                               |                                                                                                                                                                                                                                                                                                                                                                                                                                                                                                                                                                                                                                                                                                                                                                                                                                   |

SCHOLARONE™  
Manuscripts

1  
2  
3  
4 **Real-time navigation during hepatectomy using fusion indocyanine green-fluorescence**  
5  
6  
7 **imaging: protocol for a prospective cohort study**  
8  
9

10  
11  
12  
13 Hidetoshi Gon, MD, PhD<sup>a\*</sup>; Shohei Komatsu, MD, PhD<sup>a\*</sup>; Sae Murakami, MD, PhD<sup>b</sup>;

14  
15  
16 Masahiro Kido, MD, PhD<sup>a</sup>; Motofumi Tanaka, MD, PhD<sup>a</sup>; Kaori Kuramitsu, MD, PhD<sup>a</sup>;

17  
18  
19 Daisuke Tsugawa, MD, PhD<sup>a</sup>; Masahide Awazu, MD, PhD<sup>a</sup>; Hirochika Toyama, MD, PhD<sup>a</sup>;

20  
21  
22 and Takumi Fukumoto, MD, PhD<sup>a</sup>  
23  
24  
25  
26  
27

28 Department of Surgery, Division of Hepato-Biliary-Pancreatic Surgery, Kobe University

29  
30 Graduate School of Medicine<sup>a</sup>, and Clinical and Translational Research Center, Kobe

31  
32  
33 University Hospital<sup>b</sup>, Kobe, Hyogo, Japan  
34  
35  
36

37 \*These authors equally contributed to this work.  
38  
39  
40  
41  
42

43 **Corresponding author:** Hidetoshi Gon, MD, PhD, Department of Surgery, Division of

44  
45  
46 Hepato-Biliary-Pancreatic Surgery, Graduate School of Medicine, Kobe University, 7-5-2

47  
48  
49 Kusunoki-cho, Chuo-ku, Kobe 650-0017, Japan.  
50  
51

52 Tel: +81-78-382-6302  
53

54 Fax: +81-78-382-6307  
55  
56

57  
58 E-mail: [hidetoshi541128@gmail.com](mailto:hidetoshi541128@gmail.com)  
59  
60

1  
2  
3  
4 2340 words  
5  
6  
7  
8  
9

10 Keywords: indocyanine green-fluorescence imaging, liver tumour, hepatectomy  
11  
12  
13  
14  
15  
16  
17  
18  
19  
20  
21  
22  
23  
24  
25  
26  
27  
28  
29  
30  
31  
32  
33  
34  
35  
36  
37  
38  
39  
40  
41  
42  
43  
44  
45  
46  
47  
48  
49  
50  
51  
52  
53  
54  
55  
56  
57  
58  
59  
60

For peer review only

## ABSTRACT

**Introduction:** In vivo fluorescence imaging techniques using indocyanine green to identify liver tumours and hepatic segment boundaries have been recently developed. The purpose of this study is to evaluate the efficacy of fusion indocyanine green (ICG)-fluorescence imaging for navigation during hepatectomy.

**Methods and analysis:** This will be an exploratory single-arm clinical trial; patients with liver tumours will undergo hepatectomy using the ICG-fluorescence imaging system. In total, 110 patients with liver tumours scheduled for elective hepatectomy will be included in this study. Preoperatively, ICG will be intravenously injected at a dose of 0.5 mg/kg body weight within 2 days. Intraoperatively, to detect liver tumours, the hepatic surface will be initially observed using the ICG-fluorescence imaging system. After identifying and clamping the portal pedicle corresponding to the hepatic segments, including the liver tumours to be resected, additional ICG will be injected intravenously at a dose of 0.5 mg/kg body weight to identify the boundaries of the hepatic segments. The primary outcome measure will be considered to represent the success or failure of the ICG-fluorescence imaging system in identifying hepatic segments. The secondary outcomes will be the success or failure in identifying liver tumours, liver function indicators, operative time, blood loss, rate of postoperative complications, and recurrence-free survival. The findings obtained through this study are expected to help establish the utility of ICG-fluorescence imaging systems and

1  
2  
3  
4 therefore contribute to prognostic outcome improvements in patients who will undergo  
5  
6  
7 hepatectomy for various causes.  
8  
9

10 **Ethics and dissemination:** The protocol has been approved by the Kobe University Clinical  
11  
12  
13 Research Ethical Committee. The findings of this study will be disseminated widely through  
14  
15  
16 peer-reviewed publications and conference presentations.  
17

18  
19 **Trial registration number:** This study is registered at the UMIN Clinical Trials Registry:  
20  
21  
22 UMIN0000180139 and Japan Registry of Clinical Trials: jRCT1051180070. The Registration  
23  
24  
25 Data Set is available at <https://jrct.niph.go.jp/>.  
26  
27  
28  
29  
30  
31  
32  
33  
34  
35  
36  
37  
38  
39  
40  
41  
42  
43  
44  
45  
46  
47  
48  
49  
50  
51  
52  
53  
54  
55  
56  
57  
58  
59  
60

## STRENGTHS AND LIMITATIONS OF THIS STUDY

- This study is expected to address the clinical utility of real-time navigation during hepatectomy using indocyanine green (ICG)-fluorescence imaging systems.
- Efficacy and safety of hepatectomy using ICG-fluorescence imaging systems is expected to be clarified through the analysis of associations between the success rate in identifying hepatic segments and clinical outcomes, including liver function indicators, operative time, blood loss, rate of postoperative complications, and recurrence-free survival.
- This is an exploratory single-arm study, the results of which will be compared against historical data from our facility.

## INTRODUCTION

Hepatectomy remains the mainstay treatment for hepatocellular carcinoma (HCC) and metastatic liver tumours and is commonly performed in patients with preserved liver function.<sup>1-3</sup> Vascular invasion is a poor prognostic factor in HCC, and anatomical resection of the cancer-bearing portal regions is a theoretically effective procedure for the treatment of HCC and metastatic liver tumours complicated by invasion of the Glisson's capsule.<sup>4</sup>

To perform anatomical resection safely and precisely, the liver's anatomical boundaries must be visually recognized. Particularly, the hepatic veins are considered to indicate the absolute boundaries of hepatic segments and can easily be identified by intraoperative ultrasonography. However, due to the three-dimensional shape of the hepatic segment, the hepatic veins are not sufficient for guiding anatomical resection. Under such conditions, the role of intraoperative navigation in hepatectomy allows for a real-time identification of three-dimensional structures, including tumours and hepatic segment boundaries.

Several techniques for identifying hepatic segments have been reported so far.<sup>5-9</sup> Recently, in vivo fluorescence imaging techniques for the identification of biological structures intraoperatively have been developed. Among the various fluorophores used, indocyanine green (ICG) receives a substantial amount of attention because of its well-known pharmacokinetic and safety profile, making it a potentially valuable clinical tool.<sup>10</sup> For example, it is well known that ICG rapidly and completely binds to plasma proteins—among



1  
2  
3  
4 which albumin is the principal carrier—following intravenous injection. Also, ICG is excreted  
5  
6  
7 in bile in an unconjugated form and is not cleared by extrahepatic mechanisms. Furthermore,  
8  
9  
10 single or repeated intravenous injections or infusions rarely cause unfavourable adverse  
11  
12  
13 effects. Taking advantage of these characteristics and development of concomitant  
14  
15  
16 fluorescence imaging techniques, ICG-fluorescence imaging systems are widely used for  
17  
18  
19 detecting sentinel lymph nodes and arterial blood flow, and their effectiveness has been  
20  
21  
22 recognized.<sup>11,12</sup> Also, the potential utility of this approach to identify liver tumours and  
23  
24  
25 hepatic segment boundaries, as well as to detect intraoperative bile leakage has recently been  
26  
27  
28 demonstrated.<sup>7,13-19</sup>

31 The ICG-fluorescence imaging system was initially introduced for use during open  
32  
33  
34 hepatectomy. Similar fluorescence imaging systems have been recently developed for use  
35  
36  
37 during laparoscopic hepatobiliary surgery. Several reports have demonstrated the efficacy of  
38  
39  
40 such systems during laparoscopic cholecystectomy and hepatectomy.<sup>20</sup> However, whether the  
41  
42  
43 hepatic boundaries visualised by ICG-fluorescence imaging systems are clinically precise and  
44  
45  
46 useful has not been adequately assessed. For example, there may be minor deviations because  
47  
48  
49 due to the confluence of communicating vessel branches between hepatic segments and the  
50  
51  
52 injected ICG likely passes through the hepatic segments and the tumour to be removed. The  
53  
54  
55 evidence regarding the efficacy of ICG-fluorescence imaging systems is not fully established,  
56  
57  
58 and further investigation is required.

1  
2  
3  
4 The purpose of this study is to evaluate the efficacy of the ICG-fluorescence imaging  
5  
6  
7 system during hepatectomy for patients with liver tumours by analysing the detection rate of  
8  
9  
10 hepatic boundaries and tumours. In addition, we assess the precision of the detected hepatic  
11  
12  
13 boundaries by evaluating the postoperative clinical data.  
14  
15  
16  
17  
18

## 19 **METHODS AND ANALYSIS**

### 21 **Study design**

22  
23  
24  
25 This prospective study is a single-arm, exploratory clinical trial. Patients with liver  
26  
27  
28 tumours will undergo hepatectomy using the ICG-fluorescence imaging system. This study  
29  
30  
31 will be performed at Kobe University.  
32  
33  
34  
35  
36

### 37 **Target population**

38  
39  
40 From 2018 to 2021, patients with liver tumours treated at Kobe University will be  
41  
42  
43 enrolled. The inclusion criteria are as follows: male or female patients with liver tumours,  
44  
45  
46 aged 20 years and older, scheduled for elective hepatectomy, preserved liver function, ability  
47  
48  
49 to understand the nature of the study procedures, and willingness to participate and give  
50  
51  
52 voluntary written consent. Liver functional reserve will be assessed by serum biochemical  
53  
54  
55 data (albumin level, total bilirubin level, and prothrombin time) and ICG retention for 15  
56  
57  
58 minutes (ICG-R15). The patients will be categorized according to the severity of liver disease  
59  
60

1  
2  
3  
4 based on Child-Pugh stages and the liver damage classification, defined by the LCSGJ.<sup>21,22</sup>

5  
6  
7 Preserved liver function is defined as ICG-R15 <15% and Child-Pugh classification A or B.

8  
9  
10 The exclusion criteria are as follows: liver or renal insufficiency, known ICG  
11  
12 hypersensitivity, pregnancy or breastfeeding, and inability to understand the nature of the  
13  
14  
15  
16 study procedure.

## 21 22 **Intervention**

23  
24  
25 ICG is injected intravenously at a dose of 0.5 mg/kg body weight within 2 days  
26  
27 preoperatively. Intraoperatively, we will initially observe the hepatic surface using a fusion  
28  
29 ICG-fluorescence imaging system to detect liver tumours. After identifying and clamping the  
30  
31 portal pedicle corresponding to the hepatic segments to be removed, additional ICG is  
32  
33  
34 injected intravenously at a dose of 0.5 mg/kg body weight to identify the boundaries of the  
35  
36  
37 hepatic segments. Hepatectomy is performed based on the demarcation between fluorescing  
38  
39  
40 and non-fluorescing areas, which are assumed to be the boundaries of the hepatic segments.  
41  
42  
43 The demarcation will also be checked at appropriate intervals during parenchymal resection.  
44  
45  
46  
47  
48 Parenchymal resection will be performed using an ultrasonic surgical aspirator (CUSA;  
49  
50  
51 Cavitron Lasersonic Corp., Stamford, CT, USA), and a bipolar clamp coagulation system  
52  
53  
54 (ERBE, Tubingen, Germany). The fusion ICG-fluorescence images will only be used for the  
55  
56  
57  
58 hepatectomy. The Pringle manoeuvre will be performed and a drainage tube will be routinely  
59  
60

1  
2  
3  
4 inserted around the cut surface of the liver parenchyma.  
5  
6  
7  
8  
9

## 10 **Sample size calculation**

11  
12  
13 The purpose of the primary analysis of this study is to estimate the success rate, which is  
14 defined as the proportion of identifying hepatic segments by the ICG-fluorescence imaging  
15 system during hepatectomy. In order to judge the procedure as useful, a success rate of at least  
16 80% is thought to be required. When the expected success rate is 90% and the two-sided 95%  
17 confidence interval width is 0.12, the required number of participants is 98. To allow for an  
18 approximately 10% dropout, the target sample size of this study has been set to 110.  
19  
20  
21  
22  
23  
24  
25  
26  
27  
28  
29  
30  
31  
32  
33

## 34 **Outcome measures**

### 35 *Primary endpoint*

36  
37  
38 The primary endpoint is the success and failure of identifying hepatic segments using the  
39 ICG-fluorescence imaging system. We evaluate the identification of hepatic segments in two  
40 points: observation of the liver surface and the hepatic transection surface. We assume that  
41 identification is successful when fulfilling the following two criteria:  
42  
43  
44  
45  
46  
47  
48  
49  
50

#### 51 (1) Hepatic surface

52 Identification of hepatic segments by the ICG-fluorescence imaging system is considered  
53 successful when the demarcation between fluorescing and non-fluorescing areas is consistent  
54  
55  
56  
57  
58  
59  
60

1  
2  
3  
4 with the ischemic demarcation area observed by clamping the portal pedicle.  
5  
6

7 (2) Hepatic transection surface  
8  
9

10 Hepatic parenchymal resection is performed based on the demarcation between  
11  
12 fluorescing and non-fluorescing areas, which are assumed to be the boundaries of the hepatic  
13  
14 segments. We divide the time taken to perform parenchymal resection into three equal  
15  
16 intervals. We divide the time taken to perform parenchymal resection into three equal  
17  
18 intervals, and the identification of hepatic segment boundaries is evaluated at each interval.  
19  
20 Identification of hepatic segments is considered successful when we can identify the hepatic  
21  
22 segments at more than two intervals.  
23  
24  
25  
26  
27  
28  
29  
30

31 *Secondary endpoints*  
32  
33

34 The secondary endpoints are the success and failure of identifying liver tumours by the  
35  
36 ICG-fluorescence imaging system, liver function indicators (alanine transaminase, albumin,  
37  
38 total bilirubin, international normalized ratio of prothrombin time, platelet count), the  
39  
40 operative time, the blood loss, the rate of postoperative complications, and recurrence-free  
41  
42 survival. Recurrence-free survival time is defined as the time from enrolment until first  
43  
44 recurrence after the surgical intervention. Patients without recurrence will be censored at the  
45  
46 date of last confirmation of recurrence-free status. Patients lost to follow-up without a  
47  
48 diagnosis of recurrence and those who die will be censored at the date of last confirmation of  
49  
50 recurrence-free status.  
51  
52  
53  
54  
55  
56  
57  
58  
59  
60

## Data collection

Three experienced surgeons will judge the intraoperative identification hepatic segment boundaries. The success rate of their identification is used as the end point. The entire surgical procedure, including ICG-fluorescence imaging, will be digitally recorded and analyzed by an additional expert panel consisting of three highly experienced surgeons to confirm the identification of hepatic segment boundaries. A flow chart of the study procedure is presented in Figure 1.

Postoperative complications will be graded according to the extended Clavien-Dindo classification of surgical complications, which was published by the Japan Clinical Oncology Group and more precisely described the original criteria of the Clavien-Dindo classification.<sup>23,24</sup>

Follow-up visits will be carried out at two weeks after hospital discharge, and every three months thereafter. Follow-up evaluation will be performed using routine blood tests, including liver function tests, coagulation function tests, and serum AFP level; abdominal ultrasonography; and abdominal enhanced computed tomography.

## Study timeline

Data will be collected from April 2018 until January 2022, and analysis is expected to be

1  
2  
3  
4 completed around January 2023.  
5  
6

7 Participants will be informed about the study during their preoperative visit to our  
8  
9 hospital, and will have ample time to consider participation. Possible complications will be  
10  
11 evaluated in the year following the surgery. The schedules of enrolment, interventions, and  
12  
13 assessments are shown in Table 1.  
14  
15  
16  
17

## 18 19 20 21 22 **Statistical analysis** 23

24  
25 The analysis populations will include the following three sets. Firstly, the full analysis  
26  
27 set (FAS) will consist of all participants that completed the surgery with navigation by ICG-  
28  
29 fluorescence images and have efficacy data available, excluding those without baseline data  
30  
31 or significant protocol violations (e.g., absence of informed consent, enrolment outside the  
32  
33 contract period). Secondly, the per protocol set (PPS) will consist of the FAS participants  
34  
35 completed 1 year of follow-up, excluding those with any of the following significant  
36  
37 protocol violations involving the study method, the inclusion criteria, the exclusion criteria  
38  
39 and concomitant therapy. Lastly, the safety analysis set (SAS) will consist of the participants  
40  
41 who enrolled in this study and were given at least one dose of ICG.  
42  
43  
44  
45  
46  
47  
48  
49  
50

51  
52 The analysis will be performed after the data lock following completion of study drug  
53  
54 administration to all participants. For all efficacy endpoints, the FAS will be used in the  
55  
56 primary analysis, while the PPS will be used in a reference analysis. Safety will be analysed  
57  
58  
59  
60

1  
2  
3  
4 using the SAS. The baseline participant characteristics' distribution and summary statistics  
5  
6  
7 will be calculated according to group in each analysis population.  
8  
9

10 All statistical analyses will be performed as indicated using JMP software, version  
11  
12  
13 13.0.0 (SAS Institute, Inc., Cary, NC, USA).  
14  
15

16 Interim analyses will not be performed in this study.  
17  
18  
19  
20  
21

### 22 *Primary outcome*

23  
24  
25 The primary objective of this study is to estimate the success rate, which is defined as the  
26  
27  
28 proportion of identifying hepatic segments by the ICG-fluorescence imaging system. The  
29  
30  
31 point estimate of the rate and the 95% confidence interval (CI) will be calculated.  
32  
33  
34  
35  
36

### 37 *Secondary outcomes*

38  
39  
40 The point estimate and 95% CI of the success rate of tumour detection by the ICG-  
41  
42  
43 fluorescence imaging system will be calculated. For analysis of other secondary outcomes, we  
44  
45  
46 will conduct a test using historical data collected at our facility as the control group. No  
47  
48  
49 multiplicity adjustment will be performed in the analysis of secondary efficacy endpoints.  
50  
51  
52  
53  
54

### 55 *Exploratory analysis*

56  
57  
58 We will perform logistic regression analysis of the success or failure of the ICG  
59  
60



1  
2  
3  
4 fluorescence imaging system. The following factors will be included in the model: age,  
5  
6  
7 gender, body mass index, viral infection, Child-Pugh classification, cirrhosis, tumour size,  
8  
9  
10 tumour number, tumour location, type of hepatectomy, liver function indicators (alanine  
11  
12  
13 transaminase, albumin, total bilirubin, international normalized ratio and prothrombin time,  
14  
15  
16 platelet count), operative time, blood loss, rate of postoperative complications, and  
17  
18  
19 recurrence-free time.  
20  
21  
22  
23  
24

### 25 *Safety analysis*

26  
27  
28 The safety endpoint of this study is the frequency of adverse events. A table will be  
29  
30 prepared to summarize the endpoint. For estimation of the rates of adverse events, a two-sided  
31  
32  
33  
34 95% CI will be calculated.  
35  
36  
37  
38  
39

### 40 **Data monitoring**

41  
42  
43 Monitoring will be performed in order to periodically check whether the study is being  
44  
45  
46 conducted safely in accordance with the protocol and whether the data are properly collected.  
47  
48  
49 The following items are reviewed every six months: informed consent, obtained and signed;  
50  
51  
52 participant retention; study implementation system; study safety and data; and study progress.  
53  
54  
55  
56  
57

### 58 **Patient and Public involvement**

1  
2  
3  
4 There were no patient and public involvement in planning of this study.  
5  
6  
7  
8  
9

## 10 **ETHICS AND DISSEMINATION**

### 11 12 13 **Is there scientific and clinical value in conducting this study?**

14  
15  
16 We can evaluate the efficacy and safety of hepatectomy using ICG-fluorescence imaging  
17  
18 systems by analysing the association between the success rate of identifying hepatic segments  
19  
20 and clinical outcomes. This study will help determine whether the boundaries detected by  
21  
22 ICG-fluorescence imaging systems during hepatectomy are valid and useful.  
23  
24  
25  
26  
27

28 The findings obtained through this study will help establish the utility of ICG-  
29  
30 fluorescence imaging systems and therefore the study is expected to contribute to the  
31  
32 improvement of prognostic outcomes in patients who undergo hepatectomy due to various  
33  
34 causes.  
35  
36  
37  
38  
39  
40  
41  
42

### 43 **Ethical approval**

44  
45  
46 This study was approved by the Kobe University Clinical Research Ethical Committee.  
47  
48  
49 Possible protocol amendments will be sent to the Kobe University Clinical Research Ethical  
50  
51  
52 Committee.  
53  
54  
55  
56  
57

### 58 **Consideration of participants' human rights, safety, and disadvantages**

1  
2  
3  
4 The principal investigator and sub-investigators will comply with the principals of the  
5  
6  
7 protection of participants' privacy rights. Study personnel will make the utmost of effort to  
8  
9  
10 protect the participants' personal information and privacy, and will not divulge any personal  
11  
12  
13 information learned from this study without due reasons, even outside working hours. In this  
14  
15  
16 study, a list of subject identification codes will be prepared to link the subject source data  
17  
18  
19 with the study database or study-related documents. Limited participant information, such as  
20  
21  
22 sex and date of birth, may be used to identify participants or verify the list of subject  
23  
24  
25 identification codes, within the range of all applicable laws and regulations.  
26  
27

28 All effort will be taken to ensure than participants will not be personally identifiable  
29  
30  
31 from publications arising from this study.  
32  
33  
34  
35  
36

### 37 **Foreseeable disadvantages (burdens and risks)**

38  
39

40 The administration of ICG will be the only additional invasive intervention performed in  
41  
42  
43 each patient. ICG administration rarely causes anaphylactic reactions (<1:10,000). Patients  
44  
45  
46 with terminal renal insufficiency seem to be more prone for such an anaphylactic reaction.  
47  
48

49 The estimated mortality rate due to anaphylactic reaction is reported as <1 per 330,000.<sup>25-28</sup>  
50  
51

52 To minimize the risk of adverse events and disadvantages that may occur in this study,  
53  
54  
55 the inclusion and exclusion criteria have been carefully discussed. All adverse events  
56  
57  
58 occurring in this study will be monitored to ensure that they are within the expected range. If  
59  
60

1  
2  
3  
4 any serious or unexpected adverse events occur, the event will be carefully examined and  
5  
6  
7 reviewed, and necessary countermeasures will be taken. Participation in this study may  
8  
9  
10 require increased hospital visits, test frequency, and blood sampling volume, compared to  
11  
12  
13 routine medical care. In the event of tumour progression, severe organ dysfunction, physical  
14  
15  
16 weakening, etc., during the preoperative treatment or during the waiting period for surgical  
17  
18  
19 resection, the planned surgical resection may not be possible.  
20  
21  
22  
23  
24

## 25 REFERENCES

- 26  
27  
28 1. Fong ZV, Tanabe KK. The clinical management of hepatocellular carcinoma in the  
29  
30  
31 United  
32  
33  
34 States, Europe, and Asia: a comprehensive and evidence-based comparison and review.  
35  
36  
37 *Cancer* 2014;120:2824-38.  
38  
39
- 40  
41  
42 2. Kopetz S, Chang GJ, Overman MJ, et al. Improved survival in metastatic colorectal  
43  
44  
45 cancer is associated with adoption of hepatic resection and improved chemotherapy. *Journal*  
46  
47  
48 *of clinical oncology : official journal of the American Society of Clinical Oncology*  
49  
50  
51 2009;27:3677-83.  
52
- 53  
54  
55 3. Watanabe T, Itabashi M, Shimada Y, et al. Japanese Society for Cancer of the Colon and  
56  
57  
58 Rectum (JSCCR) Guidelines 2014 for treatment of colorectal cancer. *International journal*  
59  
60  
61 *of clinical oncology* 2015;20:207-39.

- 1  
2  
3  
4 4. Hasegawa K, Kokudo N, Imamura H, et al. Prognostic impact of anatomic resection for  
5  
6  
7 hepatocellular carcinoma. *Ann Surg* 2005;242:252-9.  
8  
9
- 10 5. Makuuchi M, Hasegawa H, Yamazaki S. Ultrasonically guided subsegmentectomy.  
11  
12  
13 *Surgery, gynecology & obstetrics* 1985;161:346-50.  
14  
15
- 16 6. Takasaki K. Glissonian pedicle transection method for hepatic resection: a new concept of  
17  
18  
19 liver segmentation. *Journal of hepato-biliary-pancreatic surgery* 1998;5:286-91.  
20  
21
- 22 7. Aoki T, Yasuda D, Shimizu Y, et al. Image-guided liver mapping using fluorescence  
23  
24  
25 navigation system with indocyanine green for anatomical hepatic resection. *World J Surg*  
26  
27  
28 2008;32:1763-7.  
29
- 30 8. Ahn KS, Kang KJ, Park TJ, et al. Benefit of systematic segmentectomy of the  
31  
32  
33 hepatocellular carcinoma: revisiting the dye injection method for various portal vein  
34  
35  
36 branches. *Ann Surg* 2013;258:1014-21.  
37  
38
- 39 9. Hallet J, Gayet B, Tsung A, et al. Systematic review of the use of pre-operative simulation  
40  
41  
42 and navigation for hepatectomy: current status and future perspectives. *Journal of hepato-*  
43  
44  
45 *biliary-pancreatic sciences* 2015;22:353-62.  
46  
47
- 48 10. Cherrick GR, Stein SW, Leevy CM, et al. Indocyanine green: observations on its physical  
49  
50  
51 properties, plasma decay, and hepatic extraction. *J Clin Invest* 1960;39:592-600.  
52  
53
- 54 11. Kitai T, Inomoto T, Miwa M, et al. Fluorescence navigation with indocyanine green for  
55  
56  
57 detecting sentinel lymph nodes in breast cancer. *Breast cancer (Tokyo, Japan)*  
58  
59  
60

1  
2  
3  
4 2005;12:211-5.  
5

6  
7 12. Reuthebuch O, Haussler A, Genoni M, et al. Novadaq SPY: intraoperative quality  
8  
9  
10 assessment in off-pump coronary artery bypass grafting. *Chest* 2004;125:418-24.  
11

12  
13 13. Ishizawa T, Fukushima N, Shibahara J, et al. Real-time identification of liver cancers by  
14  
15  
16 using indocyanine green fluorescent imaging. *Cancer* 2009;115:2491-504.  
17

18  
19 14. Gotoh K, Yamada T, Ishikawa O, et al. A novel image-guided surgery of hepatocellular  
20  
21  
22 carcinoma by indocyanine green fluorescence imaging navigation. *Journal of surgical*  
23  
24  
25 oncology 2009;100:75-9.  
26

27  
28 15. Ishizawa T, Bandai Y, Ijichi M, et al. Fluorescent cholangiography illuminating the biliary  
29  
30  
31 tree during laparoscopic cholecystectomy. *The British journal of surgery* 2010;97:1369-77.  
32

33  
34 16. Kaibori M, Ishizaki M, Matsui K, et al. Intraoperative indocyanine green fluorescent  
35  
36  
37 imaging for prevention of bile leakage after hepatic resection. *Surgery* 2011;150:91-8.  
38

39  
40 17. van der Vorst JR, Schaafsma BE, Hutteman M, et al. Near-infrared fluorescence-guided  
41  
42  
43 resection of colorectal liver metastases. *Cancer* 2013;119:3411-8.  
44

45  
46 18. Inoue Y, Arita J, Sakamoto T, et al. Anatomical Liver Resections Guided by 3-  
47  
48  
49 Dimensional Parenchymal Staining Using Fusion Indocyanine Green Fluorescence Imaging.  
50

51  
52 *Ann Surg* 2015;262:105-11.  
53

54  
55 19. Miyata A, Ishizawa T, Tani K, et al. Reappraisal of a Dye-Staining Technique for  
56  
57  
58 Anatomic Hepatectomy by the Concomitant Use of Indocyanine Green Fluorescence  
59  
60

1  
2  
3  
4 Imaging. *J Am Coll Surg* 2015;221:e27-36.  
5

6  
7 20. Spinoglio G, Priora F, Bianchi PP, et al. Real-time near-infrared (NIR) fluorescent  
8  
9  
10 cholangiography in single-site robotic cholecystectomy (SSRC): a single-institutional  
11  
12  
13 prospective study. *Surg Endosc* 2013;27:2156-62.  
14

15  
16 21. Pugh RN, Murray-Lyon IM, Dawson JL, et al. *Br J Surg* 1973 Aug;60:646-9.  
17

18  
19 22. The liver Cancer Study Group of Japan. The General Rules of the Clinical and  
20  
21  
22 Pathological Study of Primary Liver Cancer. 3rd ed. Tokyo: Kanehara; 2010, 1-110  
23

24  
25 23. Dindo D, Demartines N, Clavien P-A. Classification of Surgical Complications. *Annals of*  
26  
27  
28 *Surgery* 2004;240:205-13.  
29

30  
31 24. Katayama H, Kurokawa Y, Nakamura K, et al. Extended Clavien-Dindo classification of  
32  
33  
34 surgical complications: Japan Clinical Oncology Group postoperative complications criteria.  
35  
36  
37 *Surg Today* 2016;46:668-85.  
38

39  
40 25. Benya R, Quintana J, Brundage B. Adverse reactions to indocyanine green: a case report  
41  
42  
43 and a review of the literature. *Catheterization and cardiovascular diagnosis* 1989;17:231-3.  
44

45  
46 26. Wolf S, Arend O, Schulte K, et al. Severe anaphylactic reaction after indocyanine green  
47  
48  
49 fluorescence angiography. *American journal of ophthalmology* 1992;114:638-9.  
50

51  
52 27. Hope-Ross M, Yannuzzi LA, Gragoudas ES, et al. Adverse reactions due to indocyanine  
53  
54  
55 green. *Ophthalmology* 1994;101:529-33.  
56

57  
58 28. van den Bos J, Schols RM, Luyer MD, et al. Near-infrared fluorescence cholangiography  
59  
60

1  
2  
3  
4 assisted laparoscopic cholecystectomy versus conventional laparoscopic cholecystectomy  
5  
6  
7 (FALCON trial): study protocol for a multicentre randomised controlled trial. *BMJ open*  
8  
9  
10 2016;6:e011668.  
11  
12  
13  
14  
15

#### 16 **AUTHOR STATEMENT**

17  
18  
19 H. Gon, S. Komatsu, S. Murakami, M. Kido, M. Tanaka, K. Kuramitsu, M. Awazu, and  
20  
21  
22 T. Fukumoto all made substantial contributions to the conception and design of the study. H.  
23  
24  
25 Gon, S. Komatsu, and S. Murakami drafted the manuscript. All authors provided critical  
26  
27  
28 review and final approval of the present manuscript.  
29  
30  
31  
32  
33

#### 34 **FUNDING STATEMENT**

35  
36  
37 This research received no specific grant from any funding agency in the public,  
38  
39  
40 commercial or not-for-profit sectors.  
41  
42  
43  
44  
45

#### 46 **DATA SHARING STATEMENT**

47  
48  
49 This is a research protocol. That means the data for this study are being retrieved at this  
50  
51  
52 moment. All authors have access to these data, and these data will be published as described  
53  
54  
55 in the protocol, coordinated by H. Gon and S. Komatsu.  
56  
57  
58  
59  
60



1  
2  
3  
4 **COMPETING INTERESTS STATEMENT**  
5

6  
7 None declared.  
8  
9

10  
11  
12  
13 **FIGURE LEGENDS**  
14

15  
16 **Figure 1.** Flowchart of the study procedures. ICG, indocyanine green.  
17  
18  
19  
20  
21  
22  
23  
24  
25  
26  
27  
28  
29  
30  
31  
32  
33  
34  
35  
36  
37  
38  
39  
40  
41  
42  
43  
44  
45  
46  
47  
48  
49  
50  
51  
52  
53  
54  
55  
56  
57  
58  
59  
60

For peer review only

Table 1. Schedule of enrollment, interventions, and assessments.

| STUDY PERIOD                       |                                       |                   |                |                  |                  |                                   |
|------------------------------------|---------------------------------------|-------------------|----------------|------------------|------------------|-----------------------------------|
|                                    | Within 14 days<br>before registration | Before<br>surgery | Day of surgery | After<br>surgery | Day of discharge | Every 3 months<br>after discharge |
| <b>ENROLLMENT</b>                  |                                       |                   |                |                  |                  |                                   |
| Eligibility screen                 | X                                     |                   |                |                  |                  |                                   |
| Informed consent                   | X                                     |                   |                |                  |                  |                                   |
| Background<br>Blood test           | X                                     |                   |                |                  |                  |                                   |
| <b>INTERVENTIONS</b>               |                                       |                   |                |                  |                  |                                   |
| ICG-fluorescence imaging technique |                                       |                   | X              |                  |                  |                                   |
| <b>ASSESSMENTS</b>                 |                                       |                   |                |                  |                  |                                   |
| Primary outcome                    |                                       |                   | X              | X                |                  |                                   |
| Blood test                         |                                       | X                 | X              | X                | X                | X                                 |
| Postoperative complication         |                                       |                   | X              | X                | X                |                                   |
| Adverse event                      |                                       |                   | X              | X                | X                |                                   |
| Abdominal ultrasonography          |                                       |                   |                |                  |                  | X                                 |
| Abdominal enhanced CT              |                                       |                   |                |                  |                  | X                                 |

CT, computed tomography; ICG, indocyanine green.

1  
2  
3  
4  
5  
6  
7  
8  
9  
10  
11  
12  
13  
14  
15  
16  
17  
18  
19  
20  
21  
22  
23  
24  
25  
26  
27  
28  
29  
30  
31  
32  
33  
34  
35  
36  
37  
38  
39  
40  
41  
42  
43  
44  
45  
46  
47  
48  
49  
50  
51  
52  
53  
54  
55  
56  
57  
58  
59  
60

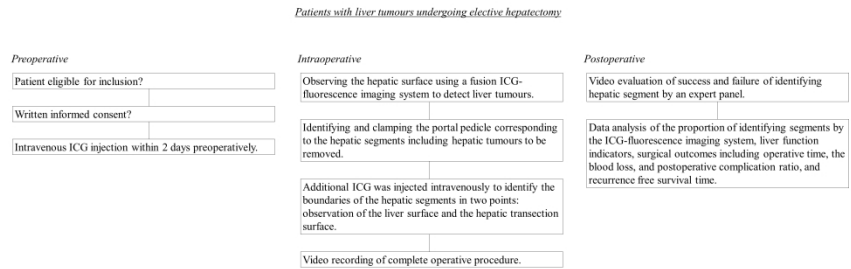

**Figure 1.** Flowchart of the study procedures.

Figure 1

1200x900mm (96 x 96 DPI)

# Reporting checklist for protocol of a clinical trial.

Based on the SPIRIT guidelines.

|                                                         |            | Reporting Item                                                                                                                                                                                                                                                                           | Page Number |
|---------------------------------------------------------|------------|------------------------------------------------------------------------------------------------------------------------------------------------------------------------------------------------------------------------------------------------------------------------------------------|-------------|
| Title                                                   | <u>#1</u>  | Descriptive title identifying the study design, population, interventions, and, if applicable, trial acronym                                                                                                                                                                             | 1           |
| Trial registration                                      | <u>#2a</u> | Trial identifier and registry name. If not yet registered, name of intended registry                                                                                                                                                                                                     | 4           |
| Trial registration: data set                            | <u>#2b</u> | All items from the World Health Organization Trial Registration Data Set                                                                                                                                                                                                                 | 4           |
| Protocol version                                        | <u>#3</u>  | Date and version identifier                                                                                                                                                                                                                                                              | 4           |
| Funding                                                 | <u>#4</u>  | Sources and types of financial, material, and other support                                                                                                                                                                                                                              | 22          |
| Roles and responsibilities: contributorship             | <u>#5a</u> | Names, affiliations, and roles of protocol contributors                                                                                                                                                                                                                                  | 21,22       |
| Roles and responsibilities: sponsor contact information | <u>#5b</u> | Name and contact information for the trial sponsor                                                                                                                                                                                                                                       | N/A         |
| Roles and responsibilities: sponsor and funder          | <u>#5c</u> | Role of study sponsor and funders, if any, in study design; collection, management, analysis, and interpretation of data; writing of the report; and the decision to submit the report for publication, including whether they will have ultimate authority over any of these activities | N/A         |
| Roles and responsibilities: committees                  | <u>#5d</u> | Composition, roles, and responsibilities of the coordinating centre, steering committee, endpoint adjudication committee, data management team, and other individuals or groups overseeing the trial, if applicable (see Item 21a for data monitoring committee)                         | N/A         |

|    |                      |             |                                                                     |       |
|----|----------------------|-------------|---------------------------------------------------------------------|-------|
| 1  | Background and       | <u>#6a</u>  | Description of research question and justification for undertaking  | 6-8   |
| 2  | rationale            |             | the trial, including summary of relevant studies (published and     |       |
| 3  |                      |             | unpublished) examining benefits and harms for each intervention     |       |
| 4  |                      |             |                                                                     |       |
| 5  |                      |             |                                                                     |       |
| 6  | Background and       | <u>#6b</u>  | Explanation for choice of comparators                               | N/A   |
| 7  | rationale: choice of |             |                                                                     |       |
| 8  | comparators          |             |                                                                     |       |
| 9  |                      |             |                                                                     |       |
| 10 |                      |             |                                                                     |       |
| 11 | Objectives           | <u>#7</u>   | Specific objectives or hypotheses                                   | 8     |
| 12 |                      |             |                                                                     |       |
| 13 |                      |             |                                                                     |       |
| 14 | Trial design         | <u>#8</u>   | Description of trial design including type of trial (eg, parallel   | 8     |
| 15 |                      |             | group, crossover, factorial, single group), allocation ratio, and   |       |
| 16 |                      |             | framework (eg, superiority, equivalence, non-inferiority,           |       |
| 17 |                      |             | exploratory)                                                        |       |
| 18 |                      |             |                                                                     |       |
| 19 |                      |             |                                                                     |       |
| 20 |                      |             |                                                                     |       |
| 21 | Study setting        | <u>#9</u>   | Description of study settings (eg, community clinic, academic       | 8     |
| 22 |                      |             | hospital) and list of countries where data will be collected.       |       |
| 23 |                      |             | Reference to where list of study sites can be obtained              |       |
| 24 |                      |             |                                                                     |       |
| 25 |                      |             |                                                                     |       |
| 26 | Eligibility criteria | <u>#10</u>  | Inclusion and exclusion criteria for participants. If applicable,   | 8,9   |
| 27 |                      |             | eligibility criteria for study centres and individuals who will     |       |
| 28 |                      |             | perform the interventions (eg, surgeons, psychotherapists)          |       |
| 29 |                      |             |                                                                     |       |
| 30 |                      |             |                                                                     |       |
| 31 | Interventions:       | <u>#11a</u> | Interventions for each group with sufficient detail to allow        | 9     |
| 32 | description          |             | replication, including how and when they will be administered       |       |
| 33 |                      |             |                                                                     |       |
| 34 |                      |             |                                                                     |       |
| 35 | Interventions:       | <u>#11b</u> | Criteria for discontinuing or modifying allocated interventions for | 16    |
| 36 | modifications        |             | a given trial participant (eg, drug dose change in response to      |       |
| 37 |                      |             | harms, participant request, or improving / worsening disease)       |       |
| 38 |                      |             |                                                                     |       |
| 39 |                      |             |                                                                     |       |
| 40 | Interventions:       | <u>#11c</u> | Strategies to improve adherence to intervention protocols, and any  | N/A   |
| 41 | adherence            |             | procedures for monitoring adherence (eg, drug tablet return;        |       |
| 42 |                      |             | laboratory tests)                                                   |       |
| 43 |                      |             |                                                                     |       |
| 44 |                      |             |                                                                     |       |
| 45 | Interventions:       | <u>#11d</u> | Relevant concomitant care and interventions that are permitted or   | N/A   |
| 46 | concomitant care     |             | prohibited during the trial                                         |       |
| 47 |                      |             |                                                                     |       |
| 48 |                      |             |                                                                     |       |
| 49 | Outcomes             | <u>#12</u>  | Primary, secondary, and other outcomes, including the specific      | 10,11 |
| 50 |                      |             | measurement variable (eg, systolic blood pressure), analysis metric |       |
| 51 |                      |             | (eg, change from baseline, final value, time to event), method of   |       |
| 52 |                      |             | aggregation (eg, median, proportion), and time point for each       |       |
| 53 |                      |             | outcome. Explanation of the clinical relevance of chosen efficacy   |       |
| 54 |                      |             | and harm outcomes is strongly recommended                           |       |
| 55 |                      |             |                                                                     |       |
| 56 |                      |             |                                                                     |       |
| 57 |                      |             |                                                                     |       |
| 58 |                      |             |                                                                     |       |
| 59 |                      |             |                                                                     |       |
| 60 |                      |             |                                                                     |       |

|    |                                          |             |                                                                                                                                                                                                                                                                                                                                                                                                              |       |
|----|------------------------------------------|-------------|--------------------------------------------------------------------------------------------------------------------------------------------------------------------------------------------------------------------------------------------------------------------------------------------------------------------------------------------------------------------------------------------------------------|-------|
| 1  | Participant timeline                     | <u>#13</u>  | Time schedule of enrolment, interventions (including any run-ins and washouts), assessments, and visits for participants. A schematic diagram is highly recommended (see Figure)                                                                                                                                                                                                                             | 12,13 |
| 2  |                                          |             |                                                                                                                                                                                                                                                                                                                                                                                                              |       |
| 3  |                                          |             |                                                                                                                                                                                                                                                                                                                                                                                                              |       |
| 4  |                                          |             |                                                                                                                                                                                                                                                                                                                                                                                                              |       |
| 5  |                                          |             |                                                                                                                                                                                                                                                                                                                                                                                                              |       |
| 6  | Sample size                              | <u>#14</u>  | Estimated number of participants needed to achieve study objectives and how it was determined, including clinical and statistical assumptions supporting any sample size calculations                                                                                                                                                                                                                        | 10    |
| 7  |                                          |             |                                                                                                                                                                                                                                                                                                                                                                                                              |       |
| 8  |                                          |             |                                                                                                                                                                                                                                                                                                                                                                                                              |       |
| 9  |                                          |             |                                                                                                                                                                                                                                                                                                                                                                                                              |       |
| 10 |                                          |             |                                                                                                                                                                                                                                                                                                                                                                                                              |       |
| 11 | Recruitment                              | <u>#15</u>  | Strategies for achieving adequate participant enrolment to reach target sample size                                                                                                                                                                                                                                                                                                                          | 10    |
| 12 |                                          |             |                                                                                                                                                                                                                                                                                                                                                                                                              |       |
| 13 |                                          |             |                                                                                                                                                                                                                                                                                                                                                                                                              |       |
| 14 |                                          |             |                                                                                                                                                                                                                                                                                                                                                                                                              |       |
| 15 | Allocation: sequence generation          | <u>#16a</u> | Method of generating the allocation sequence (eg, computer-generated random numbers), and list of any factors for stratification. To reduce predictability of a random sequence, details of any planned restriction (eg, blocking) should be provided in a separate document that is unavailable to those who enrol participants or assign interventions                                                     | N/A   |
| 16 |                                          |             |                                                                                                                                                                                                                                                                                                                                                                                                              |       |
| 17 |                                          |             |                                                                                                                                                                                                                                                                                                                                                                                                              |       |
| 18 |                                          |             |                                                                                                                                                                                                                                                                                                                                                                                                              |       |
| 19 |                                          |             |                                                                                                                                                                                                                                                                                                                                                                                                              |       |
| 20 |                                          |             |                                                                                                                                                                                                                                                                                                                                                                                                              |       |
| 21 |                                          |             |                                                                                                                                                                                                                                                                                                                                                                                                              |       |
| 22 |                                          |             |                                                                                                                                                                                                                                                                                                                                                                                                              |       |
| 23 |                                          |             |                                                                                                                                                                                                                                                                                                                                                                                                              |       |
| 24 |                                          |             |                                                                                                                                                                                                                                                                                                                                                                                                              |       |
| 25 | Allocation concealment mechanism         | <u>#16b</u> | Mechanism of implementing the allocation sequence (eg, central telephone; sequentially numbered, opaque, sealed envelopes), describing any steps to conceal the sequence until interventions are assigned                                                                                                                                                                                                    | N/A   |
| 26 |                                          |             |                                                                                                                                                                                                                                                                                                                                                                                                              |       |
| 27 |                                          |             |                                                                                                                                                                                                                                                                                                                                                                                                              |       |
| 28 |                                          |             |                                                                                                                                                                                                                                                                                                                                                                                                              |       |
| 29 |                                          |             |                                                                                                                                                                                                                                                                                                                                                                                                              |       |
| 30 |                                          |             |                                                                                                                                                                                                                                                                                                                                                                                                              |       |
| 31 |                                          |             |                                                                                                                                                                                                                                                                                                                                                                                                              |       |
| 32 | Allocation: implementation               | <u>#16c</u> | Who will generate the allocation sequence, who will enrol participants, and who will assign participants to interventions                                                                                                                                                                                                                                                                                    | N/A   |
| 33 |                                          |             |                                                                                                                                                                                                                                                                                                                                                                                                              |       |
| 34 |                                          |             |                                                                                                                                                                                                                                                                                                                                                                                                              |       |
| 35 |                                          |             |                                                                                                                                                                                                                                                                                                                                                                                                              |       |
| 36 | Blinding (masking)                       | <u>#17a</u> | Who will be blinded after assignment to interventions (eg, trial participants, care providers, outcome assessors, data analysts), and how                                                                                                                                                                                                                                                                    | N/A   |
| 37 |                                          |             |                                                                                                                                                                                                                                                                                                                                                                                                              |       |
| 38 |                                          |             |                                                                                                                                                                                                                                                                                                                                                                                                              |       |
| 39 |                                          |             |                                                                                                                                                                                                                                                                                                                                                                                                              |       |
| 40 |                                          |             |                                                                                                                                                                                                                                                                                                                                                                                                              |       |
| 41 | Blinding (masking): emergency unblinding | <u>#17b</u> | If blinded, circumstances under which unblinding is permissible, and procedure for revealing a participant's allocated intervention during the trial                                                                                                                                                                                                                                                         | N/A   |
| 42 |                                          |             |                                                                                                                                                                                                                                                                                                                                                                                                              |       |
| 43 |                                          |             |                                                                                                                                                                                                                                                                                                                                                                                                              |       |
| 44 |                                          |             |                                                                                                                                                                                                                                                                                                                                                                                                              |       |
| 45 |                                          |             |                                                                                                                                                                                                                                                                                                                                                                                                              |       |
| 46 | Data collection plan                     | <u>#18a</u> | Plans for assessment and collection of outcome, baseline, and other trial data, including any related processes to promote data quality (eg, duplicate measurements, training of assessors) and a description of study instruments (eg, questionnaires, laboratory tests) along with their reliability and validity, if known. Reference to where data collection forms can be found, if not in the protocol | 12    |
| 47 |                                          |             |                                                                                                                                                                                                                                                                                                                                                                                                              |       |
| 48 |                                          |             |                                                                                                                                                                                                                                                                                                                                                                                                              |       |
| 49 |                                          |             |                                                                                                                                                                                                                                                                                                                                                                                                              |       |
| 50 |                                          |             |                                                                                                                                                                                                                                                                                                                                                                                                              |       |
| 51 |                                          |             |                                                                                                                                                                                                                                                                                                                                                                                                              |       |
| 52 |                                          |             |                                                                                                                                                                                                                                                                                                                                                                                                              |       |
| 53 |                                          |             |                                                                                                                                                                                                                                                                                                                                                                                                              |       |
| 54 |                                          |             |                                                                                                                                                                                                                                                                                                                                                                                                              |       |
| 55 |                                          |             |                                                                                                                                                                                                                                                                                                                                                                                                              |       |
| 56 |                                          |             |                                                                                                                                                                                                                                                                                                                                                                                                              |       |
| 57 |                                          |             |                                                                                                                                                                                                                                                                                                                                                                                                              |       |
| 58 |                                          |             |                                                                                                                                                                                                                                                                                                                                                                                                              |       |
| 59 |                                          |             |                                                                                                                                                                                                                                                                                                                                                                                                              |       |
| 60 |                                          |             |                                                                                                                                                                                                                                                                                                                                                                                                              |       |

|    |                        |             |                                                                       |       |
|----|------------------------|-------------|-----------------------------------------------------------------------|-------|
| 1  | Data collection plan:  | <u>#18b</u> | Plans to promote participant retention and complete follow-up,        | N/A   |
| 2  | retention              |             | including list of any outcome data to be collected for participants   |       |
| 3  |                        |             | who discontinue or deviate from intervention protocols                |       |
| 4  |                        |             |                                                                       |       |
| 5  |                        |             |                                                                       |       |
| 6  | Data management        | <u>#19</u>  | Plans for data entry, coding, security, and storage, including any    | 16,17 |
| 7  |                        |             | related processes to promote data quality (eg, double data entry;     |       |
| 8  |                        |             | range checks for data values). Reference to where details of data     |       |
| 9  |                        |             | management procedures can be found, if not in the protocol            |       |
| 10 |                        |             |                                                                       |       |
| 11 |                        |             |                                                                       |       |
| 12 |                        |             |                                                                       |       |
| 13 | Statistics: outcomes   | <u>#20a</u> | Statistical methods for analysing primary and secondary outcomes.     | 13-15 |
| 14 |                        |             | Reference to where other details of the statistical analysis plan can |       |
| 15 |                        |             | be found, if not in the protocol                                      |       |
| 16 |                        |             |                                                                       |       |
| 17 |                        |             |                                                                       |       |
| 18 | Statistics: additional | <u>#20b</u> | Methods for any additional analyses (eg, subgroup and adjusted        | 14,15 |
| 19 | analyses               |             | analyses)                                                             |       |
| 20 |                        |             |                                                                       |       |
| 21 |                        |             |                                                                       |       |
| 22 | Statistics: analysis   | <u>#20c</u> | Definition of analysis population relating to protocol non-           | N/A   |
| 23 | population and         |             | adherence (eg, as randomised analysis), and any statistical           |       |
| 24 | missing data           |             | methods to handle missing data (eg, multiple imputation)              |       |
| 25 |                        |             |                                                                       |       |
| 26 |                        |             |                                                                       |       |
| 27 | Data monitoring:       | <u>#21a</u> | Composition of data monitoring committee (DMC); summary of            | 15    |
| 28 | formal committee       |             | its role and reporting structure; statement of whether it is          |       |
| 29 |                        |             | independent from the sponsor and competing interests; and             |       |
| 30 |                        |             | reference to where further details about its charter can be found, if |       |
| 31 |                        |             | not in the protocol. Alternatively, an explanation of why a DMC is    |       |
| 32 |                        |             | not needed                                                            |       |
| 33 |                        |             |                                                                       |       |
| 34 |                        |             |                                                                       |       |
| 35 |                        |             |                                                                       |       |
| 36 |                        |             |                                                                       |       |
| 37 | Data monitoring:       | <u>#21b</u> | Description of any interim analyses and stopping guidelines,          | 14    |
| 38 | interim analysis       |             | including who will have access to these interim results and make      |       |
| 39 |                        |             | the final decision to terminate the trial                             |       |
| 40 |                        |             |                                                                       |       |
| 41 |                        |             |                                                                       |       |
| 42 |                        |             |                                                                       |       |
| 43 | Harms                  | <u>#22</u>  | Plans for collecting, assessing, reporting, and managing solicited    | 15    |
| 44 |                        |             | and spontaneously reported adverse events and other unintended        |       |
| 45 |                        |             | effects of trial interventions or trial conduct                       |       |
| 46 |                        |             |                                                                       |       |
| 47 |                        |             |                                                                       |       |
| 48 | Auditing               | <u>#23</u>  | Frequency and procedures for auditing trial conduct, if any, and      | N/A   |
| 49 |                        |             | whether the process will be independent from investigators and the    |       |
| 50 |                        |             | sponsor                                                               |       |
| 51 |                        |             |                                                                       |       |
| 52 |                        |             |                                                                       |       |
| 53 | Research ethics        | <u>#24</u>  | Plans for seeking research ethics committee / institutional review    | 16    |
| 54 | approval               |             | board (REC / IRB) approval                                            |       |
| 55 |                        |             |                                                                       |       |
| 56 |                        |             |                                                                       |       |
| 57 | Protocol amendments    | <u>#25</u>  | Plans for communicating important protocol modifications (eg,         | N/A   |
| 58 |                        |             | changes to eligibility criteria, outcomes, analyses) to relevant      |       |
| 59 |                        |             |                                                                       |       |
| 60 |                        |             |                                                                       |       |

parties (eg, investigators, REC / IRBs, trial participants, trial registries, journals, regulators)

|    |                                             |             |                                                                                                                                                                                                                                                                                     |
|----|---------------------------------------------|-------------|-------------------------------------------------------------------------------------------------------------------------------------------------------------------------------------------------------------------------------------------------------------------------------------|
| 1  |                                             |             |                                                                                                                                                                                                                                                                                     |
| 2  |                                             |             |                                                                                                                                                                                                                                                                                     |
| 3  |                                             |             |                                                                                                                                                                                                                                                                                     |
| 4  | Consent or assent                           | <u>#26a</u> | Who will obtain informed consent or assent from potential trial participants or authorised surrogates, and how (see Item 32)                                                                                                                                                        |
| 5  |                                             |             | 12,13                                                                                                                                                                                                                                                                               |
| 6  |                                             |             |                                                                                                                                                                                                                                                                                     |
| 7  |                                             |             |                                                                                                                                                                                                                                                                                     |
| 8  | Consent or assent: ancillary studies        | <u>#26b</u> | Additional consent provisions for collection and use of participant data and biological specimens in ancillary studies, if applicable                                                                                                                                               |
| 9  |                                             |             | N/A                                                                                                                                                                                                                                                                                 |
| 10 |                                             |             |                                                                                                                                                                                                                                                                                     |
| 11 | Confidentiality                             | <u>#27</u>  | How personal information about potential and enrolled participants will be collected, shared, and maintained in order to protect confidentiality before, during, and after the trial                                                                                                |
| 12 |                                             |             | 16,17                                                                                                                                                                                                                                                                               |
| 13 |                                             |             |                                                                                                                                                                                                                                                                                     |
| 14 |                                             |             |                                                                                                                                                                                                                                                                                     |
| 15 |                                             |             |                                                                                                                                                                                                                                                                                     |
| 16 |                                             |             |                                                                                                                                                                                                                                                                                     |
| 17 | Declaration of interests                    | <u>#28</u>  | Financial and other competing interests for principal investigators for the overall trial and each study site                                                                                                                                                                       |
| 18 |                                             |             | 22                                                                                                                                                                                                                                                                                  |
| 19 |                                             |             |                                                                                                                                                                                                                                                                                     |
| 20 |                                             |             |                                                                                                                                                                                                                                                                                     |
| 21 | Data access                                 | <u>#29</u>  | Statement of who will have access to the final trial dataset, and disclosure of contractual agreements that limit such access for investigators                                                                                                                                     |
| 22 |                                             |             | N/A                                                                                                                                                                                                                                                                                 |
| 23 |                                             |             |                                                                                                                                                                                                                                                                                     |
| 24 |                                             |             |                                                                                                                                                                                                                                                                                     |
| 25 |                                             |             |                                                                                                                                                                                                                                                                                     |
| 26 | Ancillary and post trial care               | <u>#30</u>  | Provisions, if any, for ancillary and post-trial care, and for compensation to those who suffer harm from trial participation                                                                                                                                                       |
| 27 |                                             |             | 15                                                                                                                                                                                                                                                                                  |
| 28 |                                             |             |                                                                                                                                                                                                                                                                                     |
| 29 |                                             |             |                                                                                                                                                                                                                                                                                     |
| 30 | Dissemination policy: trial results         | <u>#31a</u> | Plans for investigators and sponsor to communicate trial results to participants, healthcare professionals, the public, and other relevant groups (eg, via publication, reporting in results databases, or other data sharing arrangements), including any publication restrictions |
| 31 |                                             |             | N/A                                                                                                                                                                                                                                                                                 |
| 32 |                                             |             |                                                                                                                                                                                                                                                                                     |
| 33 |                                             |             |                                                                                                                                                                                                                                                                                     |
| 34 |                                             |             |                                                                                                                                                                                                                                                                                     |
| 35 |                                             |             |                                                                                                                                                                                                                                                                                     |
| 36 |                                             |             |                                                                                                                                                                                                                                                                                     |
| 37 |                                             |             |                                                                                                                                                                                                                                                                                     |
| 38 | Dissemination policy: authorship            | <u>#31b</u> | Authorship eligibility guidelines and any intended use of professional writers                                                                                                                                                                                                      |
| 39 |                                             |             | N/A                                                                                                                                                                                                                                                                                 |
| 40 |                                             |             |                                                                                                                                                                                                                                                                                     |
| 41 |                                             |             |                                                                                                                                                                                                                                                                                     |
| 42 | Dissemination policy: reproducible research | <u>#31c</u> | Plans, if any, for granting public access to the full protocol, participant-level dataset, and statistical code                                                                                                                                                                     |
| 43 |                                             |             | N/A                                                                                                                                                                                                                                                                                 |
| 44 |                                             |             |                                                                                                                                                                                                                                                                                     |
| 45 |                                             |             |                                                                                                                                                                                                                                                                                     |
| 46 | Informed consent materials                  | <u>#32</u>  | Model consent form and other related documentation given to participants and authorised surrogates                                                                                                                                                                                  |
| 47 |                                             |             | N/A                                                                                                                                                                                                                                                                                 |
| 48 |                                             |             |                                                                                                                                                                                                                                                                                     |
| 49 |                                             |             |                                                                                                                                                                                                                                                                                     |
| 50 | Biological specimens                        | <u>#33</u>  | Plans for collection, laboratory evaluation, and storage of biological specimens for genetic or molecular analysis in the current trial and for future use in ancillary studies, if applicable                                                                                      |
| 51 |                                             |             | N/A                                                                                                                                                                                                                                                                                 |
| 52 |                                             |             |                                                                                                                                                                                                                                                                                     |
| 53 |                                             |             |                                                                                                                                                                                                                                                                                     |
| 54 |                                             |             |                                                                                                                                                                                                                                                                                     |
| 55 |                                             |             |                                                                                                                                                                                                                                                                                     |
| 56 |                                             |             |                                                                                                                                                                                                                                                                                     |
| 57 |                                             |             |                                                                                                                                                                                                                                                                                     |
| 58 |                                             |             |                                                                                                                                                                                                                                                                                     |
| 59 |                                             |             |                                                                                                                                                                                                                                                                                     |
| 60 |                                             |             |                                                                                                                                                                                                                                                                                     |



# BMJ Open

## Real-time navigation during hepatectomy using fusion indocyanine green-fluorescence imaging: protocol for a prospective cohort study

|                                 |                                                                                                                                                                                                                                                                                                                                                                                                                                                                                                                                                                                                                                                                                                                                                                                                                                   |
|---------------------------------|-----------------------------------------------------------------------------------------------------------------------------------------------------------------------------------------------------------------------------------------------------------------------------------------------------------------------------------------------------------------------------------------------------------------------------------------------------------------------------------------------------------------------------------------------------------------------------------------------------------------------------------------------------------------------------------------------------------------------------------------------------------------------------------------------------------------------------------|
| Journal:                        | <i>BMJ Open</i>                                                                                                                                                                                                                                                                                                                                                                                                                                                                                                                                                                                                                                                                                                                                                                                                                   |
| Manuscript ID                   | bmjopen-2019-030233.R1                                                                                                                                                                                                                                                                                                                                                                                                                                                                                                                                                                                                                                                                                                                                                                                                            |
| Article Type:                   | Protocol                                                                                                                                                                                                                                                                                                                                                                                                                                                                                                                                                                                                                                                                                                                                                                                                                          |
| Date Submitted by the Author:   | 06-May-2019                                                                                                                                                                                                                                                                                                                                                                                                                                                                                                                                                                                                                                                                                                                                                                                                                       |
| Complete List of Authors:       | Gon, Hidetoshi; Kobe University Graduate School of Medicine School of Medicine, Surgery;<br>Komatsu, Shohei; Kobe University Graduate School of Medicine School of Medicine<br>Murakami, Sae; Kobe University Hospital,<br>Kido, Masahiro; Kobe University Graduate School of Medicine School of Medicine<br>Tanaka, Motofumi; Kobe University Graduate School of Medicine School of Medicine<br>Kuramitsu, Kaori; Kobe University Graduate School of Medicine School of Medicine<br>Tsugawa, Daisuke; Kobe University Graduate School of Medicine School of Medicine<br>Awazu, Masahide; Kobe University Graduate School of Medicine School of Medicine<br>Toyama, Hirochika; Kobe University Graduate School of Medicine School of Medicine<br>Fukumoto, Takumi; Kobe University Graduate School of Medicine School of Medicine |
| <b>Primary Subject Heading</b>: | Gastroenterology and hepatology                                                                                                                                                                                                                                                                                                                                                                                                                                                                                                                                                                                                                                                                                                                                                                                                   |
| Secondary Subject Heading:      | Gastroenterology and hepatology                                                                                                                                                                                                                                                                                                                                                                                                                                                                                                                                                                                                                                                                                                                                                                                                   |
| Keywords:                       | indocyanine green-fluorescence imaging, liver tumour, hepatectomy                                                                                                                                                                                                                                                                                                                                                                                                                                                                                                                                                                                                                                                                                                                                                                 |
|                                 |                                                                                                                                                                                                                                                                                                                                                                                                                                                                                                                                                                                                                                                                                                                                                                                                                                   |

SCHOLARONE™  
Manuscripts

1  
2  
3  
4 **Real-time navigation during hepatectomy using fusion indocyanine green-fluorescence**  
5  
6  
7 **imaging: protocol for a prospective cohort study**  
8  
9

10  
11  
12  
13 Hidetoshi Gon, MD, PhD<sup>a\*</sup>; Shohei Komatsu, MD, PhD<sup>a\*</sup>; Sae Murakami, MD, PhD<sup>b</sup>;

14  
15  
16 Masahiro Kido, MD, PhD<sup>a</sup>; Motofumi Tanaka, MD, PhD<sup>a</sup>; Kaori Kuramitsu, MD, PhD<sup>a</sup>;

17  
18  
19 Daisuke Tsugawa, MD, PhD<sup>a</sup>; Masahide Awazu, MD, PhD<sup>a</sup>; Hirochika Toyama, MD, PhD<sup>a</sup>;

20  
21  
22 and Takumi Fukumoto, MD, PhD<sup>a</sup>  
23  
24  
25  
26  
27

28 Department of Surgery, Division of Hepato-Biliary-Pancreatic Surgery, Kobe University

29  
30 Graduate School of Medicine<sup>a</sup>, and Clinical and Translational Research Center, Kobe

31  
32  
33 University Hospital<sup>b</sup>, Kobe, Hyogo, Japan  
34  
35  
36

37 \*These authors equally contributed to this work.  
38  
39  
40  
41  
42

43 **Corresponding author:** Hidetoshi Gon, MD, PhD, Department of Surgery, Division of

44  
45  
46 Hepato-Biliary-Pancreatic Surgery, Graduate School of Medicine, Kobe University, 7-5-2

47  
48  
49 Kusunoki-cho, Chuo-ku, Kobe 650-0017, Japan  
50  
51

52 Tel: +81-78-382-6302  
53

54  
55 Fax: +81-78-382-6307  
56

57  
58 E-mail: [hidetoshi541128@gmail.com](mailto:hidetoshi541128@gmail.com)  
59  
60

1  
2  
3  
4 2566 words  
5  
6  
7  
8  
9

10 Keywords: indocyanine green-fluorescence imaging, liver tumour, hepatectomy  
11  
12  
13  
14  
15  
16  
17  
18  
19  
20  
21  
22  
23  
24  
25  
26  
27  
28  
29  
30  
31  
32  
33  
34  
35  
36  
37  
38  
39  
40  
41  
42  
43  
44  
45  
46  
47  
48  
49  
50  
51  
52  
53  
54  
55  
56  
57  
58  
59  
60

For peer review only

## ABSTRACT

**Introduction:** In vivo fluorescence imaging techniques using indocyanine green to identify liver tumours and hepatic segment boundaries have been recently developed. The purpose of this study is to evaluate the efficacy of fusion indocyanine green (ICG)-fluorescence imaging for navigation during hepatectomy.

**Methods and analysis:** This will be an exploratory single-arm clinical trial; patients with liver tumours will undergo hepatectomy using the ICG-fluorescence imaging system. In total, 110 patients with liver tumours scheduled for elective hepatectomy will be included in this study. Preoperatively, ICG will be intravenously injected at a dose of 0.5 mg/kg body weight within 2 days. Intraoperatively, to detect liver tumours, the hepatic surface will be initially observed using the ICG-fluorescence imaging system. After identifying and clamping the portal pedicle corresponding to the hepatic segments, including the liver tumours to be resected, additional ICG will be injected intravenously at a dose of 0.5 mg/kg body weight to identify the boundaries of the hepatic segments. The primary outcome measure will be the success or failure of the ICG-fluorescence imaging system in identifying hepatic segments. The secondary outcomes will be the success or failure in identifying liver tumours, liver function indicators, operative time, blood loss, rate of postoperative complications, and recurrence-free survival. The findings obtained through this study are expected to help establish the utility of ICG-fluorescence imaging systems and therefore contribute to

1  
2  
3  
4 prognostic outcome improvements in patients undergoing hepatectomy for various causes.  
5  
6

7 **Ethics and dissemination:** The protocol has been approved by the Kobe University Clinical  
8  
9  
10 Research Ethical Committee. The findings of this study will be disseminated widely through  
11  
12  
13 peer-reviewed publications and conference presentations.  
14  
15

16 **Trial registration number:** This study is registered at the UMIN Clinical Trials Registry:  
17  
18  
19 UMIN0000180139 and Japan Registry of Clinical Trials: jRCT1051180070. The Registration  
20  
21  
22 Data Set is available at <https://jrct.niph.go.jp/>.  
23  
24  
25  
26  
27  
28  
29  
30  
31  
32  
33  
34  
35  
36  
37  
38  
39  
40  
41  
42  
43  
44  
45  
46  
47  
48  
49  
50  
51  
52  
53  
54  
55  
56  
57  
58  
59  
60

## STRENGTHS AND LIMITATIONS OF THIS STUDY

- This study is expected to address the clinical utility of real-time navigation during hepatectomy using indocyanine green (ICG)-fluorescence imaging systems.
- The efficacy and safety of hepatectomy using ICG-fluorescence imaging systems is expected to be clarified through the analysis of associations between the success rate in identifying hepatic segments and clinical outcomes, including liver function indicators, operative time, blood loss, rate of postoperative complications, and recurrence-free survival.
- This is an exploratory single-arm study, the results of which will be compared against historical data from our facility.

## INTRODUCTION

Hepatectomy remains the mainstay treatment for hepatocellular carcinoma (HCC) and metastatic liver tumours and is commonly performed in patients with preserved liver function.<sup>1-3</sup> Vascular invasion is a poor prognostic factor in HCC, and anatomical resection of the cancer-bearing portal regions is a theoretically effective procedure for the treatment of HCC and metastatic liver tumours complicated by invasion of the Glisson's capsule.<sup>4</sup>

To perform anatomical resection safely and precisely, the liver's anatomical boundaries must be visually recognized. Particularly, the hepatic veins are considered to indicate the absolute boundaries of hepatic segments and can easily be identified by intraoperative ultrasonography. However, due to the three-dimensional shape of the hepatic segment, the hepatic veins are not sufficient for guiding anatomical resection. Under such conditions, intraoperative navigation in hepatectomy allows for the real-time identification of three-dimensional structures, including tumours and hepatic segment boundaries.

Several techniques for identifying hepatic segments have been reported thus far.<sup>5-9</sup> Recently, in vivo fluorescence imaging techniques for the identification of biological structures intraoperatively have been developed. Among the various fluorophores used, indocyanine green (ICG) receives a substantial amount of attention because of its well-known pharmacokinetic and safety profile, making it a potentially valuable clinical tool.<sup>10</sup> For example, it is well known that ICG rapidly and completely binds to plasma proteins - among

1  
2  
3  
4 which albumin is the principal carrier - following intravenous injection. Also, ICG is excreted  
5  
6  
7 in bile in an unconjugated form and is not cleared by extrahepatic mechanisms. Furthermore,  
8  
9  
10 single or repeated intravenous injections or infusions rarely cause unfavourable adverse  
11  
12  
13 effects. Taking advantage of these characteristics and the development of concomitant  
14  
15  
16 fluorescence imaging techniques, ICG-fluorescence imaging systems are widely used for  
17  
18  
19 detecting sentinel lymph nodes and arterial blood flow, and their effectiveness has been  
20  
21  
22 recognized.<sup>11,12</sup> Also, the potential utility of this approach to identify liver tumours and  
23  
24  
25 hepatic segment boundaries, as well as to detect the bile duct tree intraoperatively, has  
26  
27  
28 recently been demonstrated.<sup>7,13-19</sup>

31 The ICG-fluorescence imaging system was initially introduced for use during open  
32  
33  
34 hepatectomy. Similar fluorescence imaging systems have been recently developed for use  
35  
36  
37 during laparoscopic hepatobiliary surgery. Several reports have demonstrated the efficacy of  
38  
39  
40 such systems during laparoscopic cholecystectomy and hepatectomy.<sup>20</sup> However, whether the  
41  
42  
43 hepatic boundaries visualised by ICG-fluorescence imaging systems are clinically precise and  
44  
45  
46 useful has not been adequately assessed. For example, there may be minor deviations due to  
47  
48  
49 the confluence of communicating vessel branches between hepatic segments; the injected ICG  
50  
51  
52 likely passes through the hepatic segments and the tumour to be removed. Evidence regarding  
53  
54  
55 the efficacy of ICG-fluorescence imaging systems is not fully established, and further  
56  
57  
58 investigation is required.  
59  
60



1  
2  
3  
4 The purpose of this study is to evaluate the efficacy of the ICG-fluorescence imaging  
5  
6  
7 system during hepatectomy for patients with liver tumours by analysing the detection rate of  
8  
9  
10 hepatic boundaries and tumours. In addition, we assess the precision of the detected hepatic  
11  
12  
13 boundaries by evaluating the postoperative clinical data.  
14  
15  
16  
17  
18

## 19 **METHODS AND ANALYSIS**

### 21 **Study design**

22  
23  
24  
25 This prospective study is a single-arm, exploratory clinical trial. Patients with liver  
26  
27  
28 tumours will undergo hepatectomy using the ICG-fluorescence imaging system. This study  
29  
30  
31 will be performed at Kobe University.  
32  
33  
34  
35  
36

### 37 **Target population**

38  
39  
40 From 2018 to 2020, patients with liver tumours treated at Kobe University will be  
41  
42  
43 enrolled. The inclusion criteria are as follows: male or female patients with liver tumours,  
44  
45  
46 aged 20 years and older, scheduled for elective hepatectomy, preserved liver function, ability  
47  
48  
49 to understand the nature of the study procedures, and willingness to participate and give  
50  
51  
52 voluntary written consent. Liver functional reserve will be assessed by serum biochemical  
53  
54  
55 data (albumin level, total bilirubin level, and prothrombin time) and ICG retention for 15  
56  
57  
58 minutes (ICG-R15). The patients will be categorized according to the severity of liver disease  
59  
60

1  
2  
3  
4 based on Child-Pugh stages and the liver damage classification, defined by the Liver Cancer  
5  
6  
7 Study Group of Japan.<sup>21,22</sup> Preserved liver function is defined as ICG-R15 <15% and Child-  
8  
9  
10 Pugh classification A or B.

11  
12  
13 The exclusion criteria are as follows: liver or renal insufficiency, known ICG  
14  
15  
16 hypersensitivity, pregnancy or breastfeeding, and inability to understand the nature of the  
17  
18  
19 study procedure.  
20  
21  
22  
23  
24

## 25 **Intervention**

26  
27  
28 ICG is injected intravenously at a dose of 0.5 mg/kg body weight within 2 days  
29  
30  
31 preoperatively. Intraoperatively, we will initially observe the hepatic surface using a fusion  
32  
33  
34 ICG-fluorescence imaging system (PINPOINT, Stryker Japan K.K.) to detect liver tumours.  
35  
36  
37 Among several methods for identifying liver segments with fluorescence imaging, we will use  
38  
39  
40 the negative staining technique to identify the liver segments in this study.<sup>23</sup> After identifying  
41  
42  
43 and clamping the portal pedicle corresponding to the hepatic segments to be removed,  
44  
45  
46 additional ICG is injected intravenously at a dose of 0.5 mg/kg body weight to identify the  
47  
48  
49 boundaries of the hepatic segments.<sup>24</sup> Hepatectomy is performed based on the demarcation  
50  
51  
52 between fluorescing and non-fluorescing areas, which are assumed to be the boundaries of the  
53  
54  
55 hepatic segments. The demarcation will also be checked at appropriate intervals during  
56  
57  
58 parenchymal resection. Parenchymal resection will be performed using an ultrasonic surgical  
59  
60

1  
2  
3  
4 aspirator (CUSA; Cavitron Lasersonic Corp., Stamford, CT, USA), and a bipolar clamp  
5  
6  
7 coagulation system (ERBE, Tübingen, Germany). The fusion ICG-fluorescence images will  
8  
9  
10 only be used for the hepatectomy. The Pringle manoeuvre will be performed and a drainage  
11  
12  
13 tube will be routinely inserted around the cut surface of the liver parenchyma.  
14  
15  
16  
17  
18

### 19 **Sample size calculation**

20  
21  
22 The purpose of the primary analysis of this study is to estimate the success rate, which is  
23  
24 defined as the proportion hepatic segments identified by the ICG-fluorescence imaging  
25  
26  
27 system during hepatectomy. In order to judge the procedure as useful, a success rate of at least  
28  
29  
30 80% is thought to be required. When the expected success rate is 90% and the two-sided 95%  
31  
32  
33 confidence interval width is 0.12, the required number of participants is 98. To allow for an  
34  
35  
36 approximately 10% dropout, the target sample size of this study has been set to 110.  
37  
38  
39  
40  
41  
42

### 43 **Outcome measures**

#### 44 *Primary endpoint*

45  
46  
47  
48 The primary endpoint is the success and failure of identifying hepatic segments using the  
49  
50  
51 ICG-fluorescence imaging system. We will evaluate the identification of hepatic segments at  
52  
53  
54 two points: observation of the liver surface and the hepatic transection surface. We assume  
55  
56  
57 that identification is successful when fulfilling the following two criteria:  
58  
59  
60

1  
2  
3  
4 (1) Hepatic surface  
5  
6

7 Identification of hepatic segments by the ICG-fluorescence imaging system is considered  
8  
9  
10 successful when the demarcation between fluorescing and non-fluorescing areas is consistent  
11  
12  
13 with the ischemic demarcation area observed by clamping the portal pedicle.  
14  
15

16 (2) Hepatic transection surface  
17  
18

19 Hepatic parenchymal resection is performed based on the demarcation between  
20  
21  
22 fluorescing and non-fluorescing areas, which are assumed to be the boundaries of the hepatic  
23  
24  
25 segments. We divide the time taken to perform parenchymal resection into three equal  
26  
27  
28 intervals by reviewing the recorded videos after surgery, and the identification of hepatic  
29  
30  
31 segment boundaries is evaluated at each interval. Identification of hepatic segments is  
32  
33  
34 considered successful when we can identify the hepatic segments for more than 80% of the  
35  
36  
37 process during parenchymal resection at more than two intervals.  
38  
39  
40  
41  
42

43 *Secondary endpoints*  
44  
45

46 The secondary endpoints are the success and failure of identifying liver tumours by the  
47  
48  
49 ICG-fluorescence imaging system, liver function indicators (alanine transaminase, albumin,  
50  
51  
52 total bilirubin, international normalized ratio of prothrombin time, platelet count), the  
53  
54  
55 operative time, the blood loss, the rate of postoperative complications, and recurrence-free  
56  
57  
58 survival. Successful identification of liver tumours is determined when any isolated  
59  
60

1  
2  
3  
4 fluorescence signals are detected, also considering liver tumours diagnosed by other  
5  
6  
7 modalities, including preoperative imaging and IOUS, and finally confirmed by pathological  
8  
9  
10 examination. The fluorescence pattern is considered according to the preoperative diagnosis  
11  
12  
13 because liver lesions have differing fluorescence patterns on the basis of their tumour  
14  
15  
16 biology.<sup>25</sup> If we identify lesions with isolated fluorescence signal on fusion-fluorescence  
17  
18  
19 imaging that were not identified by preoperative imaging, we evaluate the lesions by  
20  
21  
22 intraoperative ultrasound sonography, and, if necessary, frozen section biopsies are performed  
23  
24  
25 to determine whether additional hepatectomy is required. The recurrence-free survival is  
26  
27  
28 analysed for each liver tumour, including primary liver cancer and liver metastases.  
29  
30  
31 Recurrence-free survival time is defined as the time from enrolment until first recurrence after  
32  
33  
34 the surgical intervention. Patients without recurrence will be censored at the date of last  
35  
36  
37 confirmation of recurrence-free status. Patients lost to follow-up without a diagnosis of  
38  
39  
40 recurrence and those who die will be censored at the date of last confirmation of recurrence-  
41  
42  
43 free status.  
44  
45  
46  
47  
48

### 49 **Data collection**

50  
51  
52 Three experienced surgeons will judge the intraoperative identification of hepatic  
53  
54  
55 segment boundaries. The entire surgical procedure, including ICG-fluorescence imaging, will  
56  
57  
58 be digitally recorded and analysed by an additional expert panel consisting of three highly  
59  
60

1  
2  
3  
4 experienced surgeons, different from those performing the surgeries, to confirm the  
5  
6  
7 identification of hepatic segment boundaries. The success rate of their identification is used as  
8  
9  
10 the end point. A flow chart of the study procedure is presented in Figure 1.  
11  
12

13 Postoperative complications will be graded according to the extended Clavien-Dindo  
14  
15  
16 classification of surgical complications, which was published by the Japan Clinical Oncology  
17  
18  
19 Group and more precisely described the original criteria of the Clavien-Dindo  
20  
21  
22 classification.<sup>26,27</sup>  
23  
24

25 Follow-up visits will be carried out at two weeks after hospital discharge, and every  
26  
27  
28 three months thereafter. Follow-up evaluation will be performed using routine blood tests,  
29  
30  
31 including liver function tests, coagulation function tests, serum tumour maker levels  
32  
33  
34 depending on the type of liver tumour, abdominal ultrasonography, and abdominal enhanced  
35  
36  
37 computed tomography.  
38  
39  
40  
41  
42

### 43 **Study timeline**

44  
45  
46 Data will be collected from February 2018 until January 2020, and analysis is expected  
47  
48  
49 to be completed around January 2022.  
50  
51

52 Participants will be informed about the study during their preoperative visit to our  
53  
54  
55 hospital, and will have ample time to consider participation. Possible complications will be  
56  
57  
58 evaluated in the year following the surgery. The schedules of enrolment, interventions, and  
59  
60

1  
2  
3  
4 assessments are shown in Table 1.  
5  
6  
7  
8  
9

### 10 **Statistical analysis**

11  
12  
13 The analysis populations will include the following three sets. Firstly, the full analysis  
14 set (FAS) will consist of all participants that completed the surgery with navigation by ICG-  
15  
16 set (FAS) will consist of all participants that completed the surgery with navigation by ICG-  
17  
18 fluorescence images and have efficacy data available, excluding those without baseline data  
19  
20 or significant protocol violations (e.g., absence of informed consent, enrolment outside the  
21  
22 contract period). Secondly, the per protocol set (PPS) will consist of the FAS participants  
23  
24 completing 1 year of follow-up, excluding those with any significant protocol violations  
25  
26 involving the study method, the inclusion criteria, the exclusion criteria, and concomitant  
27  
28 therapy. Lastly, the safety analysis set (SAS) will consist of the participants who enrolled in  
29  
30 this study and were given at least one dose of ICG.  
31  
32  
33  
34  
35  
36  
37  
38  
39

40 The analysis will be performed after the data lock following completion of study drug  
41  
42 administration to all participants. For all efficacy endpoints, the FAS will be used in the  
43  
44 primary analysis, while the PPS will be used in a reference analysis. Safety will be analysed  
45  
46 using the SAS. The baseline participant characteristics' distribution and summary statistics  
47  
48 will be calculated according to group in each analysis population.  
49  
50  
51  
52  
53

54  
55 All statistical analyses will be performed as indicated using JMP software, version  
56  
57 13.0.0 (SAS Institute, Inc., Cary, NC, USA).  
58  
59  
60

1  
2  
3  
4 Interim analyses will not be performed in this study.  
5  
6  
7  
8  
9

10 *Primary outcome*  
11  
12

13 The primary objective of this study is to estimate the success rate, which is defined as the  
14 proportion of hepatic segments identified by the ICG-fluorescence imaging system. The point  
15 estimate of the rate and the 95% confidence interval (CI) will be calculated.  
16  
17  
18  
19  
20  
21  
22  
23  
24

25 *Secondary outcomes*  
26  
27

28 The point estimate and 95% CI of the success rate of tumour detection by the ICG-  
29 fluorescence imaging system will be calculated. For analysis of other secondary outcomes, we  
30 will conduct a test using historical data collected at our facility as the control group. No  
31 multiplicity adjustment will be performed in the analysis of secondary efficacy endpoints.  
32  
33  
34  
35  
36  
37  
38  
39  
40  
41  
42

43 *Exploratory analysis*  
44  
45

46 We will perform logistic regression analysis regarding the success or failure of  
47 identifying liver segments using the ICG fluorescence imaging system. The following factors  
48 will be included in the model to evaluate the association between the proportion of successful  
49 cases of liver segment identification and clinical variables: age, sex, body mass index, viral  
50 infection, Child-Pugh classification, cirrhosis, tumour size, tumour number, tumour location,  
51  
52  
53  
54  
55  
56  
57  
58  
59  
60



1  
2  
3  
4 type of hepatectomy, liver function indicators (alanine transaminase, albumin, total bilirubin,  
5  
6  
7 international normalized ratio, prothrombin time, platelet count), operative time, blood loss,  
8  
9  
10 rate of postoperative complications, and recurrence-free time.  
11  
12  
13  
14  
15

### 16 *Safety analysis*

17  
18 The safety endpoint of this study is the frequency of adverse events. A table will be  
19  
20 prepared to summarize the endpoint. For estimation of the rates of adverse events, a two-sided  
21  
22  
23  
24  
25 95% CI will be calculated.  
26  
27  
28  
29  
30

### 31 **Data monitoring**

32  
33  
34 Monitoring will be performed in order to periodically check whether the study is being  
35  
36  
37 conducted safely in accordance with the protocol and whether the data are properly collected.  
38  
39  
40 The following items are reviewed every six months: informed consent, obtained and signed;  
41  
42  
43 participant retention; study implementation system; study safety and data; and study progress.  
44  
45  
46  
47  
48

### 49 **Patient and Public involvement**

50  
51  
52 There was no patient and/or public involvement in planning of this study.  
53  
54  
55  
56  
57

### 58 **ETHICS AND DISSEMINATION**

### **Is there scientific and clinical value in conducting this study?**

Whereas the conventional pedicle clamping method can only detect hepatic boundaries from the hepatic surface, the ICG-fluorescence imaging system can detect both the hepatic surface and transection surface during parenchymal resection. We can evaluate the efficacy and safety of hepatectomy using ICG-fluorescence imaging systems by analysing the association between the success rate of identifying hepatic segments and clinical outcomes. This study will help determine whether the boundaries detected by ICG-fluorescence imaging systems during hepatectomy are valid and useful.

The findings obtained through this study will help establish the utility of ICG-fluorescence imaging systems and therefore the study is expected to contribute to the improvement of prognostic outcomes in patients who undergo hepatectomy due to various causes.

### **Ethical approval**

This study was approved by the Kobe University Clinical Research Ethical Committee. Possible protocol amendments will be sent to the Kobe University Clinical Research Ethical Committee.

### **Consideration of participants' human rights, safety, and disadvantages**

1  
2  
3  
4 The principal investigator and sub-investigators will comply with the principals of the  
5  
6  
7 protection of participants' privacy rights. Study personnel will make the utmost of effort to  
8  
9  
10 protect the participants' personal information and privacy, and will not divulge any personal  
11  
12  
13 information learned from this study without due reasons, even outside working hours. In this  
14  
15  
16 study, a list of subject identification codes will be prepared to link the subject source data  
17  
18  
19 with the study database or study-related documents. Limited participant information, such as  
20  
21  
22 sex and date of birth, may be used to identify participants or verify the list of subject  
23  
24  
25 identification codes, within the range of all applicable laws and regulations.  
26  
27

28 All effort will be taken to ensure than participants will not be personally identifiable  
29  
30  
31 from publications arising from this study.  
32  
33  
34  
35  
36

### 37 **Foreseeable disadvantages (burdens and risks)**

38  
39

40 The administration of ICG will be the only additional invasive intervention performed in  
41  
42  
43 each patient. ICG administration rarely causes anaphylactic reactions (<1:10,000). Patients  
44  
45  
46 with terminal renal insufficiency seem to be more prone for such an anaphylactic reaction.  
47  
48

49 The estimated mortality rate due to anaphylactic reaction is reported as <1 per 330,000.<sup>28-31</sup>  
50  
51

52 To minimize the risk of adverse events and disadvantages that may occur in this study,  
53  
54  
55 the inclusion and exclusion criteria have been carefully discussed. All adverse events  
56  
57  
58 occurring in this study will be monitored to ensure that they are within the expected range. If  
59  
60

1  
2  
3  
4 any serious or unexpected adverse events occur, the event will be carefully examined and  
5  
6  
7 reviewed, and necessary countermeasures will be taken. Participation in this study may  
8  
9  
10 require increased hospital visits, test frequency, and blood sampling volume, compared to  
11  
12  
13 routine medical care. In the event of tumour progression, severe organ dysfunction, physical  
14  
15  
16 weakening, etc., during the preoperative treatment or during the waiting period for surgical  
17  
18  
19 resection, the planned surgical resection may not be possible.  
20  
21  
22  
23  
24

## 25 REFERENCES

- 26  
27  
28 1. Fong ZV, Tanabe KK. The clinical management of hepatocellular carcinoma in the  
29  
30 United  
31  
32 States, Europe, and Asia: a comprehensive and evidence-based comparison and review.  
33  
34 Cancer 2014;120:2824-38.  
35  
36  
37  
38  
39
- 40 2. Kopetz S, Chang GJ, Overman MJ, et al. Improved survival in metastatic colorectal  
41  
42 cancer is associated with adoption of hepatic resection and improved chemotherapy. Journal  
43  
44 of clinical oncology : official journal of the American Society of Clinical Oncology  
45  
46 2009;27:3677-83.  
47  
48  
49  
50
- 51 3. Watanabe T, Itabashi M, Shimada Y, et al. Japanese Society for Cancer of the Colon and  
52  
53 Rectum (JSCCR) Guidelines 2014 for treatment of colorectal cancer. International journal  
54  
55 of clinical oncology 2015;20:207-39.  
56  
57  
58  
59  
60

- 1  
2  
3  
4 4. Hasegawa K, Kokudo N, Imamura H, et al. Prognostic impact of anatomic resection for  
5  
6  
7 hepatocellular carcinoma. *Ann Surg* 2005;242:252-9.  
8  
9
- 10 5. Makuuchi M, Hasegawa H, Yamazaki S. Ultrasonically guided subsegmentectomy.  
11  
12  
13 *Surgery, gynecology & obstetrics* 1985;161:346-50.  
14  
15
- 16 6. Takasaki K. Glissonian pedicle transection method for hepatic resection: a new concept of  
17  
18  
19 liver segmentation. *Journal of hepato-biliary-pancreatic surgery* 1998;5:286-91.  
20  
21
- 22 7. Aoki T, Yasuda D, Shimizu Y, et al. Image-guided liver mapping using fluorescence  
23  
24  
25 navigation system with indocyanine green for anatomical hepatic resection. *World J Surg*  
26  
27  
28 2008;32:1763-7.  
29
- 30 8. Ahn KS, Kang KJ, Park TJ, et al. Benefit of systematic segmentectomy of the  
31  
32  
33 hepatocellular carcinoma: revisiting the dye injection method for various portal vein  
34  
35  
36 branches. *Ann Surg* 2013;258:1014-21.  
37  
38
- 39 9. Hallet J, Gayet B, Tsung A, et al. Systematic review of the use of pre-operative simulation  
40  
41  
42 and navigation for hepatectomy: current status and future perspectives. *Journal of hepato-*  
43  
44  
45 *biliary-pancreatic sciences* 2015;22:353-62.  
46  
47
- 48 10. Cherrick GR, Stein SW, Leevy CM, et al. Indocyanine green: observations on its physical  
49  
50  
51 properties, plasma decay, and hepatic extraction. *J Clin Invest* 1960;39:592-600.  
52  
53
- 54 11. Kitai T, Inomoto T, Miwa M, et al. Fluorescence navigation with indocyanine green for  
55  
56  
57 detecting sentinel lymph nodes in breast cancer. *Breast cancer (Tokyo, Japan)*  
58  
59  
60

1  
2  
3  
4 2005;12:211-5.  
5

6  
7 12. Reuthebuch O, Haussler A, Genoni M, et al. Novadaq SPY: intraoperative quality  
8  
9  
10 assessment in off-pump coronary artery bypass grafting. *Chest* 2004;125:418-24.  
11

12  
13 13. Ishizawa T, Fukushima N, Shibahara J, et al. Real-time identification of liver cancers by  
14  
15  
16 using indocyanine green fluorescent imaging. *Cancer* 2009;115:2491-504.  
17

18  
19 14. Gotoh K, Yamada T, Ishikawa O, et al. A novel image-guided surgery of hepatocellular  
20  
21  
22 carcinoma by indocyanine green fluorescence imaging navigation. *Journal of surgical*  
23  
24  
25 oncology 2009;100:75-9.  
26

27  
28 15. Ishizawa T, Bandai Y, Ijichi M, et al. Fluorescent cholangiography illuminating the biliary  
29  
30  
31 tree during laparoscopic cholecystectomy. *The British journal of surgery* 2010;97:1369-77.  
32

33  
34 16. Kaibori M, Ishizaki M, Matsui K, et al. Intraoperative indocyanine green fluorescent  
35  
36  
37 imaging for prevention of bile leakage after hepatic resection. *Surgery* 2011;150:91-8.  
38

39  
40 17. van der Vorst JR, Schaafsma BE, Hutteman M, et al. Near-infrared fluorescence-guided  
41  
42  
43 resection of colorectal liver metastases. *Cancer* 2013;119:3411-8.  
44

45  
46 18. Inoue Y, Arita J, Sakamoto T, et al. Anatomical Liver Resections Guided by 3-  
47  
48  
49 Dimensional Parenchymal Staining Using Fusion Indocyanine Green Fluorescence Imaging.  
50  
51  
52 *Ann Surg* 2015;262:105-11.  
53

54  
55 19. Miyata A, Ishizawa T, Tani K, et al. Reappraisal of a Dye-Staining Technique for  
56  
57  
58 Anatomic Hepatectomy by the Concomitant Use of Indocyanine Green Fluorescence  
59  
60

1  
2  
3  
4 Imaging. *J Am Coll Surg* 2015;221:e27-36.  
5

6  
7 20. Spinoglio G, Priora F, Bianchi PP, et al. Real-time near-infrared (NIR) fluorescent  
8  
9  
10 cholangiography in single-site robotic cholecystectomy (SSRC): a single-institutional  
11  
12  
13 prospective study. *Surg Endosc* 2013;27:2156-62.  
14

15  
16 21. Pugh RN, Murray-Lyon IM, Dawson JL, et al. *Br J Surg* 1973 Aug;60:646-9.  
17

18  
19 22. The liver Cancer Study Group of Japan. The General Rules of the Clinical and  
20  
21  
22 Pathological Study of Primary Liver Cancer. 3rd ed. Tokyo: Kanehara; 2010, 1-110  
23

24  
25 23. Kobayashi Y, Kawaguchi Y, Kobayashi K, et al. Portal vein territory identification using  
26  
27  
28 indocyanine green fluorescence imaging: Technical details and short-term outcomes. *J Surg*  
29  
30  
31 *Oncol.* 2017;116:921-31.  
32

33  
34 24. Uchiyama K, Ueno M, Ozawa S, et al. Combined intraoperative use of contrast-enhanced  
35  
36  
37 ultrasonography imaging using a sonazoid and fluorescence navigation system with  
38  
39  
40 indocyanine green during anatomical hepatectomy. *Langenbecks Arch Surg.* 2011;396:1101-  
41  
42  
43 7.  
44

45  
46 25. Abo T, Nanashima A, Tobinaga S, et al. Usefulness of intraoperative diagnosis of hepatic  
47  
48  
49 tumors located at the liver surface and hepatic segmental visualization using indocyanine  
50  
51  
52 green-photodynamic eye imaging. *Eur J Surg Oncol.* 2015;41:257-64.  
53

54  
55 26. Dindo D, Demartines N, Clavien P-A. Classification of Surgical Complications. *Annals of*  
56  
57  
58 *Surgery* 2004;240:205-13.  
59  
60

- 1  
2  
3  
4 27. Katayama H, Kurokawa Y, Nakamura K, et al. Extended Clavien-Dindo classification of  
5  
6  
7 surgical complications: Japan Clinical Oncology Group postoperative complications criteria.  
8  
9  
10 Surg Today 2016;46:668-85.  
11  
12  
13 28. Benya R, Quintana J, Brundage B. Adverse reactions to indocyanine green: a case report  
14  
15  
16 and a review of the literature. Catheterization and cardiovascular diagnosis 1989;17:231-3.  
17  
18  
19 29. Wolf S, Arend O, Schulte K, et al. Severe anaphylactic reaction after indocyanine green  
20  
21  
22 fluorescence angiography. American journal of ophthalmology 1992;114:638-9.  
23  
24  
25 30. Hope-Ross M, Yannuzzi LA, Gragoudas ES, et al. Adverse reactions due to indocyanine  
26  
27  
28 green. Ophthalmology 1994;101:529-33.  
29  
30  
31 31. van den Bos J, Schols RM, Luyer MD, et al. Near-infrared fluorescence cholangiography  
32  
33  
34 assisted laparoscopic cholecystectomy versus conventional laparoscopic cholecystectomy  
35  
36  
37 (FALCON trial): study protocol for a multicentre randomised controlled trial. BMJ open  
38  
39  
40 2016;6:e011668.  
41  
42  
43  
44  
45

#### 46 **AUTHOR STATEMENT**

47  
48  
49 H. Gon, S. Komatsu, S. Murakami, M. Kido, M. Tanaka, K. Kuramitsu, D. Tsugawa, M.  
50  
51  
52 Awazu, H. Toyama, and T. Fukumoto all made substantial contributions to the conception  
53  
54  
55 and design of the study. H. Gon, S. Komatsu, and S. Murakami drafted the manuscript. All  
56  
57  
58 authors provided critical review and final approval of the present manuscript.  
59  
60



## FUNDING STATEMENT

This research received no specific grant from any funding agency in the public, commercial, or not-for-profit sectors.

## DATA SHARING STATEMENT

This is a research protocol. That means the data for this study are being collected currently. All authors have access to these data, and these data will be published as described in the protocol, coordinated by H. Gon and S. Komatsu.

## COMPETING INTERESTS STATEMENT

None declared.

## FIGURE LEGENDS

**Figure 1.** Flowchart of the study procedures. ICG, indocyanine green.

Table 1. Schedule of enrolment, interventions, and assessments.

| STUDY PERIOD                       |                                       |                   |                |                  |                  |                                   |
|------------------------------------|---------------------------------------|-------------------|----------------|------------------|------------------|-----------------------------------|
|                                    | Within 14 days<br>before registration | Before<br>surgery | Day of surgery | After<br>surgery | Day of discharge | Every 3 months<br>after discharge |
| <b>ENROLMENT</b>                   |                                       |                   |                |                  |                  |                                   |
| Eligibility screen                 | X                                     |                   |                |                  |                  |                                   |
| Informed consent                   | X                                     |                   |                |                  |                  |                                   |
| Background<br>Blood test           | X                                     |                   |                |                  |                  |                                   |
| <b>INTERVENTIONS</b>               |                                       |                   |                |                  |                  |                                   |
| ICG-fluorescence imaging technique |                                       |                   | X              |                  |                  |                                   |
| <b>ASSESSMENTS</b>                 |                                       |                   |                |                  |                  |                                   |
| Primary outcome                    |                                       |                   | X              | X                |                  |                                   |
| Blood test                         |                                       | X                 | X              | X                | X                | X                                 |
| Postoperative complication         |                                       |                   | X              | X                | X                |                                   |
| Adverse event                      |                                       |                   | X              | X                | X                |                                   |
| Abdominal ultrasonography          |                                       |                   |                |                  |                  | X                                 |
| Abdominal enhanced CT              |                                       |                   |                |                  |                  | X                                 |

CT, computed tomography; ICG, indocyanine green.

1  
2  
3  
4  
5  
6  
7  
8  
9  
10  
11  
12  
13  
14  
15  
16  
17  
18  
19  
20  
21  
22  
23  
24  
25  
26  
27  
28  
29  
30  
31  
32  
33  
34  
35  
36  
37  
38  
39  
40  
41  
42  
43  
44  
45  
46  
47  
48  
49  
50  
51  
52  
53  
54  
55  
56  
57  
58  
59  
60

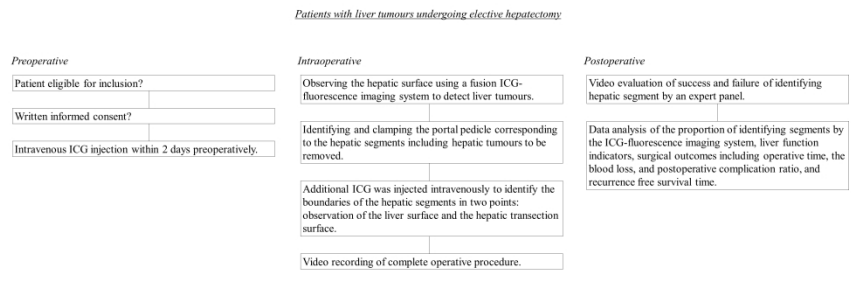

**Figure 1.** Flowchart of the study procedures.

Figure 1

1200x900mm (96 x 96 DPI)

# Reporting checklist for protocol of a clinical trial.

Based on the SPIRIT guidelines.

|                                                         |            | Reporting Item                                                                                                                                                                                                                                                                           | Page Number |
|---------------------------------------------------------|------------|------------------------------------------------------------------------------------------------------------------------------------------------------------------------------------------------------------------------------------------------------------------------------------------|-------------|
| Title                                                   | <u>#1</u>  | Descriptive title identifying the study design, population, interventions, and, if applicable, trial acronym                                                                                                                                                                             | 1           |
| Trial registration                                      | <u>#2a</u> | Trial identifier and registry name. If not yet registered, name of intended registry                                                                                                                                                                                                     | 4           |
| Trial registration: data set                            | <u>#2b</u> | All items from the World Health Organization Trial Registration Data Set                                                                                                                                                                                                                 | 4           |
| Protocol version                                        | <u>#3</u>  | Date and version identifier                                                                                                                                                                                                                                                              | 4           |
| Funding                                                 | <u>#4</u>  | Sources and types of financial, material, and other support                                                                                                                                                                                                                              | 22          |
| Roles and responsibilities: contributorship             | <u>#5a</u> | Names, affiliations, and roles of protocol contributors                                                                                                                                                                                                                                  | 21,22       |
| Roles and responsibilities: sponsor contact information | <u>#5b</u> | Name and contact information for the trial sponsor                                                                                                                                                                                                                                       | N/A         |
| Roles and responsibilities: sponsor and funder          | <u>#5c</u> | Role of study sponsor and funders, if any, in study design; collection, management, analysis, and interpretation of data; writing of the report; and the decision to submit the report for publication, including whether they will have ultimate authority over any of these activities | N/A         |
| Roles and responsibilities: committees                  | <u>#5d</u> | Composition, roles, and responsibilities of the coordinating centre, steering committee, endpoint adjudication committee, data management team, and other individuals or groups overseeing the trial, if applicable (see Item 21a for data monitoring committee)                         | N/A         |

|    |                      |             |                                                                     |       |
|----|----------------------|-------------|---------------------------------------------------------------------|-------|
| 1  | Background and       | <u>#6a</u>  | Description of research question and justification for undertaking  | 6-8   |
| 2  | rationale            |             | the trial, including summary of relevant studies (published and     |       |
| 3  |                      |             | unpublished) examining benefits and harms for each intervention     |       |
| 4  |                      |             |                                                                     |       |
| 5  |                      |             |                                                                     |       |
| 6  | Background and       | <u>#6b</u>  | Explanation for choice of comparators                               | N/A   |
| 7  | rationale: choice of |             |                                                                     |       |
| 8  | comparators          |             |                                                                     |       |
| 9  |                      |             |                                                                     |       |
| 10 |                      |             |                                                                     |       |
| 11 | Objectives           | <u>#7</u>   | Specific objectives or hypotheses                                   | 8     |
| 12 |                      |             |                                                                     |       |
| 13 |                      |             |                                                                     |       |
| 14 | Trial design         | <u>#8</u>   | Description of trial design including type of trial (eg, parallel   | 8     |
| 15 |                      |             | group, crossover, factorial, single group), allocation ratio, and   |       |
| 16 |                      |             | framework (eg, superiority, equivalence, non-inferiority,           |       |
| 17 |                      |             | exploratory)                                                        |       |
| 18 |                      |             |                                                                     |       |
| 19 |                      |             |                                                                     |       |
| 20 |                      |             |                                                                     |       |
| 21 | Study setting        | <u>#9</u>   | Description of study settings (eg, community clinic, academic       | 8     |
| 22 |                      |             | hospital) and list of countries where data will be collected.       |       |
| 23 |                      |             | Reference to where list of study sites can be obtained              |       |
| 24 |                      |             |                                                                     |       |
| 25 |                      |             |                                                                     |       |
| 26 | Eligibility criteria | <u>#10</u>  | Inclusion and exclusion criteria for participants. If applicable,   | 8,9   |
| 27 |                      |             | eligibility criteria for study centres and individuals who will     |       |
| 28 |                      |             | perform the interventions (eg, surgeons, psychotherapists)          |       |
| 29 |                      |             |                                                                     |       |
| 30 |                      |             |                                                                     |       |
| 31 | Interventions:       | <u>#11a</u> | Interventions for each group with sufficient detail to allow        | 9     |
| 32 | description          |             | replication, including how and when they will be administered       |       |
| 33 |                      |             |                                                                     |       |
| 34 |                      |             |                                                                     |       |
| 35 | Interventions:       | <u>#11b</u> | Criteria for discontinuing or modifying allocated interventions for | 16    |
| 36 | modifications        |             | a given trial participant (eg, drug dose change in response to      |       |
| 37 |                      |             | harms, participant request, or improving / worsening disease)       |       |
| 38 |                      |             |                                                                     |       |
| 39 |                      |             |                                                                     |       |
| 40 | Interventions:       | <u>#11c</u> | Strategies to improve adherence to intervention protocols, and any  | N/A   |
| 41 | adherence            |             | procedures for monitoring adherence (eg, drug tablet return;        |       |
| 42 |                      |             | laboratory tests)                                                   |       |
| 43 |                      |             |                                                                     |       |
| 44 |                      |             |                                                                     |       |
| 45 | Interventions:       | <u>#11d</u> | Relevant concomitant care and interventions that are permitted or   | N/A   |
| 46 | concomitant care     |             | prohibited during the trial                                         |       |
| 47 |                      |             |                                                                     |       |
| 48 |                      |             |                                                                     |       |
| 49 | Outcomes             | <u>#12</u>  | Primary, secondary, and other outcomes, including the specific      | 10,11 |
| 50 |                      |             | measurement variable (eg, systolic blood pressure), analysis metric |       |
| 51 |                      |             | (eg, change from baseline, final value, time to event), method of   |       |
| 52 |                      |             | aggregation (eg, median, proportion), and time point for each       |       |
| 53 |                      |             | outcome. Explanation of the clinical relevance of chosen efficacy   |       |
| 54 |                      |             | and harm outcomes is strongly recommended                           |       |
| 55 |                      |             |                                                                     |       |
| 56 |                      |             |                                                                     |       |
| 57 |                      |             |                                                                     |       |
| 58 |                      |             |                                                                     |       |
| 59 |                      |             |                                                                     |       |
| 60 |                      |             |                                                                     |       |

|    |                                          |             |                                                                                                                                                                                                                                                                                                                                                                                                              |       |
|----|------------------------------------------|-------------|--------------------------------------------------------------------------------------------------------------------------------------------------------------------------------------------------------------------------------------------------------------------------------------------------------------------------------------------------------------------------------------------------------------|-------|
| 1  | Participant timeline                     | <u>#13</u>  | Time schedule of enrolment, interventions (including any run-ins and washouts), assessments, and visits for participants. A schematic diagram is highly recommended (see Figure)                                                                                                                                                                                                                             | 12,13 |
| 2  |                                          |             |                                                                                                                                                                                                                                                                                                                                                                                                              |       |
| 3  |                                          |             |                                                                                                                                                                                                                                                                                                                                                                                                              |       |
| 4  |                                          |             |                                                                                                                                                                                                                                                                                                                                                                                                              |       |
| 5  |                                          |             |                                                                                                                                                                                                                                                                                                                                                                                                              |       |
| 6  | Sample size                              | <u>#14</u>  | Estimated number of participants needed to achieve study objectives and how it was determined, including clinical and statistical assumptions supporting any sample size calculations                                                                                                                                                                                                                        | 10    |
| 7  |                                          |             |                                                                                                                                                                                                                                                                                                                                                                                                              |       |
| 8  |                                          |             |                                                                                                                                                                                                                                                                                                                                                                                                              |       |
| 9  |                                          |             |                                                                                                                                                                                                                                                                                                                                                                                                              |       |
| 10 |                                          |             |                                                                                                                                                                                                                                                                                                                                                                                                              |       |
| 11 | Recruitment                              | <u>#15</u>  | Strategies for achieving adequate participant enrolment to reach target sample size                                                                                                                                                                                                                                                                                                                          | 10    |
| 12 |                                          |             |                                                                                                                                                                                                                                                                                                                                                                                                              |       |
| 13 |                                          |             |                                                                                                                                                                                                                                                                                                                                                                                                              |       |
| 14 |                                          |             |                                                                                                                                                                                                                                                                                                                                                                                                              |       |
| 15 | Allocation: sequence generation          | <u>#16a</u> | Method of generating the allocation sequence (eg, computer-generated random numbers), and list of any factors for stratification. To reduce predictability of a random sequence, details of any planned restriction (eg, blocking) should be provided in a separate document that is unavailable to those who enrol participants or assign interventions                                                     | N/A   |
| 16 |                                          |             |                                                                                                                                                                                                                                                                                                                                                                                                              |       |
| 17 |                                          |             |                                                                                                                                                                                                                                                                                                                                                                                                              |       |
| 18 |                                          |             |                                                                                                                                                                                                                                                                                                                                                                                                              |       |
| 19 |                                          |             |                                                                                                                                                                                                                                                                                                                                                                                                              |       |
| 20 |                                          |             |                                                                                                                                                                                                                                                                                                                                                                                                              |       |
| 21 |                                          |             |                                                                                                                                                                                                                                                                                                                                                                                                              |       |
| 22 |                                          |             |                                                                                                                                                                                                                                                                                                                                                                                                              |       |
| 23 |                                          |             |                                                                                                                                                                                                                                                                                                                                                                                                              |       |
| 24 |                                          |             |                                                                                                                                                                                                                                                                                                                                                                                                              |       |
| 25 | Allocation concealment mechanism         | <u>#16b</u> | Mechanism of implementing the allocation sequence (eg, central telephone; sequentially numbered, opaque, sealed envelopes), describing any steps to conceal the sequence until interventions are assigned                                                                                                                                                                                                    | N/A   |
| 26 |                                          |             |                                                                                                                                                                                                                                                                                                                                                                                                              |       |
| 27 |                                          |             |                                                                                                                                                                                                                                                                                                                                                                                                              |       |
| 28 |                                          |             |                                                                                                                                                                                                                                                                                                                                                                                                              |       |
| 29 |                                          |             |                                                                                                                                                                                                                                                                                                                                                                                                              |       |
| 30 |                                          |             |                                                                                                                                                                                                                                                                                                                                                                                                              |       |
| 31 |                                          |             |                                                                                                                                                                                                                                                                                                                                                                                                              |       |
| 32 | Allocation: implementation               | <u>#16c</u> | Who will generate the allocation sequence, who will enrol participants, and who will assign participants to interventions                                                                                                                                                                                                                                                                                    | N/A   |
| 33 |                                          |             |                                                                                                                                                                                                                                                                                                                                                                                                              |       |
| 34 |                                          |             |                                                                                                                                                                                                                                                                                                                                                                                                              |       |
| 35 |                                          |             |                                                                                                                                                                                                                                                                                                                                                                                                              |       |
| 36 | Blinding (masking)                       | <u>#17a</u> | Who will be blinded after assignment to interventions (eg, trial participants, care providers, outcome assessors, data analysts), and how                                                                                                                                                                                                                                                                    | N/A   |
| 37 |                                          |             |                                                                                                                                                                                                                                                                                                                                                                                                              |       |
| 38 |                                          |             |                                                                                                                                                                                                                                                                                                                                                                                                              |       |
| 39 |                                          |             |                                                                                                                                                                                                                                                                                                                                                                                                              |       |
| 40 |                                          |             |                                                                                                                                                                                                                                                                                                                                                                                                              |       |
| 41 | Blinding (masking): emergency unblinding | <u>#17b</u> | If blinded, circumstances under which unblinding is permissible, and procedure for revealing a participant's allocated intervention during the trial                                                                                                                                                                                                                                                         | N/A   |
| 42 |                                          |             |                                                                                                                                                                                                                                                                                                                                                                                                              |       |
| 43 |                                          |             |                                                                                                                                                                                                                                                                                                                                                                                                              |       |
| 44 |                                          |             |                                                                                                                                                                                                                                                                                                                                                                                                              |       |
| 45 |                                          |             |                                                                                                                                                                                                                                                                                                                                                                                                              |       |
| 46 | Data collection plan                     | <u>#18a</u> | Plans for assessment and collection of outcome, baseline, and other trial data, including any related processes to promote data quality (eg, duplicate measurements, training of assessors) and a description of study instruments (eg, questionnaires, laboratory tests) along with their reliability and validity, if known. Reference to where data collection forms can be found, if not in the protocol | 12    |
| 47 |                                          |             |                                                                                                                                                                                                                                                                                                                                                                                                              |       |
| 48 |                                          |             |                                                                                                                                                                                                                                                                                                                                                                                                              |       |
| 49 |                                          |             |                                                                                                                                                                                                                                                                                                                                                                                                              |       |
| 50 |                                          |             |                                                                                                                                                                                                                                                                                                                                                                                                              |       |
| 51 |                                          |             |                                                                                                                                                                                                                                                                                                                                                                                                              |       |
| 52 |                                          |             |                                                                                                                                                                                                                                                                                                                                                                                                              |       |
| 53 |                                          |             |                                                                                                                                                                                                                                                                                                                                                                                                              |       |
| 54 |                                          |             |                                                                                                                                                                                                                                                                                                                                                                                                              |       |
| 55 |                                          |             |                                                                                                                                                                                                                                                                                                                                                                                                              |       |
| 56 |                                          |             |                                                                                                                                                                                                                                                                                                                                                                                                              |       |
| 57 |                                          |             |                                                                                                                                                                                                                                                                                                                                                                                                              |       |
| 58 |                                          |             |                                                                                                                                                                                                                                                                                                                                                                                                              |       |
| 59 |                                          |             |                                                                                                                                                                                                                                                                                                                                                                                                              |       |
| 60 |                                          |             |                                                                                                                                                                                                                                                                                                                                                                                                              |       |

|    |                        |             |                                                                       |       |
|----|------------------------|-------------|-----------------------------------------------------------------------|-------|
| 1  | Data collection plan:  | <u>#18b</u> | Plans to promote participant retention and complete follow-up,        | N/A   |
| 2  | retention              |             | including list of any outcome data to be collected for participants   |       |
| 3  |                        |             | who discontinue or deviate from intervention protocols                |       |
| 4  |                        |             |                                                                       |       |
| 5  |                        |             |                                                                       |       |
| 6  | Data management        | <u>#19</u>  | Plans for data entry, coding, security, and storage, including any    | 16,17 |
| 7  |                        |             | related processes to promote data quality (eg, double data entry;     |       |
| 8  |                        |             | range checks for data values). Reference to where details of data     |       |
| 9  |                        |             | management procedures can be found, if not in the protocol            |       |
| 10 |                        |             |                                                                       |       |
| 11 |                        |             |                                                                       |       |
| 12 |                        |             |                                                                       |       |
| 13 | Statistics: outcomes   | <u>#20a</u> | Statistical methods for analysing primary and secondary outcomes.     | 13-15 |
| 14 |                        |             | Reference to where other details of the statistical analysis plan can |       |
| 15 |                        |             | be found, if not in the protocol                                      |       |
| 16 |                        |             |                                                                       |       |
| 17 |                        |             |                                                                       |       |
| 18 | Statistics: additional | <u>#20b</u> | Methods for any additional analyses (eg, subgroup and adjusted        | 14,15 |
| 19 | analyses               |             | analyses)                                                             |       |
| 20 |                        |             |                                                                       |       |
| 21 |                        |             |                                                                       |       |
| 22 | Statistics: analysis   | <u>#20c</u> | Definition of analysis population relating to protocol non-           | N/A   |
| 23 | population and         |             | adherence (eg, as randomised analysis), and any statistical           |       |
| 24 | missing data           |             | methods to handle missing data (eg, multiple imputation)              |       |
| 25 |                        |             |                                                                       |       |
| 26 |                        |             |                                                                       |       |
| 27 | Data monitoring:       | <u>#21a</u> | Composition of data monitoring committee (DMC); summary of            | 15    |
| 28 | formal committee       |             | its role and reporting structure; statement of whether it is          |       |
| 29 |                        |             | independent from the sponsor and competing interests; and             |       |
| 30 |                        |             | reference to where further details about its charter can be found, if |       |
| 31 |                        |             | not in the protocol. Alternatively, an explanation of why a DMC is    |       |
| 32 |                        |             | not needed                                                            |       |
| 33 |                        |             |                                                                       |       |
| 34 |                        |             |                                                                       |       |
| 35 |                        |             |                                                                       |       |
| 36 |                        |             |                                                                       |       |
| 37 | Data monitoring:       | <u>#21b</u> | Description of any interim analyses and stopping guidelines,          | 14    |
| 38 | interim analysis       |             | including who will have access to these interim results and make      |       |
| 39 |                        |             | the final decision to terminate the trial                             |       |
| 40 |                        |             |                                                                       |       |
| 41 |                        |             |                                                                       |       |
| 42 |                        |             |                                                                       |       |
| 43 | Harms                  | <u>#22</u>  | Plans for collecting, assessing, reporting, and managing solicited    | 15    |
| 44 |                        |             | and spontaneously reported adverse events and other unintended        |       |
| 45 |                        |             | effects of trial interventions or trial conduct                       |       |
| 46 |                        |             |                                                                       |       |
| 47 |                        |             |                                                                       |       |
| 48 | Auditing               | <u>#23</u>  | Frequency and procedures for auditing trial conduct, if any, and      | N/A   |
| 49 |                        |             | whether the process will be independent from investigators and the    |       |
| 50 |                        |             | sponsor                                                               |       |
| 51 |                        |             |                                                                       |       |
| 52 |                        |             |                                                                       |       |
| 53 | Research ethics        | <u>#24</u>  | Plans for seeking research ethics committee / institutional review    | 16    |
| 54 | approval               |             | board (REC / IRB) approval                                            |       |
| 55 |                        |             |                                                                       |       |
| 56 |                        |             |                                                                       |       |
| 57 | Protocol amendments    | <u>#25</u>  | Plans for communicating important protocol modifications (eg,         | N/A   |
| 58 |                        |             | changes to eligibility criteria, outcomes, analyses) to relevant      |       |
| 59 |                        |             |                                                                       |       |
| 60 |                        |             |                                                                       |       |

|    |                                             |                                                                                                                                                                                                                                                                                                 |       |
|----|---------------------------------------------|-------------------------------------------------------------------------------------------------------------------------------------------------------------------------------------------------------------------------------------------------------------------------------------------------|-------|
| 1  |                                             | parties (eg, investigators, REC / IRBs, trial participants, trial registries, journals, regulators)                                                                                                                                                                                             |       |
| 2  |                                             |                                                                                                                                                                                                                                                                                                 |       |
| 3  |                                             |                                                                                                                                                                                                                                                                                                 |       |
| 4  | Consent or assent                           | <u>#26a</u> Who will obtain informed consent or assent from potential trial participants or authorised surrogates, and how (see Item 32)                                                                                                                                                        | 12,13 |
| 5  |                                             |                                                                                                                                                                                                                                                                                                 |       |
| 6  |                                             |                                                                                                                                                                                                                                                                                                 |       |
| 7  |                                             |                                                                                                                                                                                                                                                                                                 |       |
| 8  | Consent or assent: ancillary studies        | <u>#26b</u> Additional consent provisions for collection and use of participant data and biological specimens in ancillary studies, if applicable                                                                                                                                               | N/A   |
| 9  |                                             |                                                                                                                                                                                                                                                                                                 |       |
| 10 |                                             |                                                                                                                                                                                                                                                                                                 |       |
| 11 | Confidentiality                             | <u>#27</u> How personal information about potential and enrolled participants will be collected, shared, and maintained in order to protect confidentiality before, during, and after the trial                                                                                                 | 16,17 |
| 12 |                                             |                                                                                                                                                                                                                                                                                                 |       |
| 13 |                                             |                                                                                                                                                                                                                                                                                                 |       |
| 14 |                                             |                                                                                                                                                                                                                                                                                                 |       |
| 15 |                                             |                                                                                                                                                                                                                                                                                                 |       |
| 16 |                                             |                                                                                                                                                                                                                                                                                                 |       |
| 17 | Declaration of interests                    | <u>#28</u> Financial and other competing interests for principal investigators for the overall trial and each study site                                                                                                                                                                        | 22    |
| 18 |                                             |                                                                                                                                                                                                                                                                                                 |       |
| 19 |                                             |                                                                                                                                                                                                                                                                                                 |       |
| 20 |                                             |                                                                                                                                                                                                                                                                                                 |       |
| 21 | Data access                                 | <u>#29</u> Statement of who will have access to the final trial dataset, and disclosure of contractual agreements that limit such access for investigators                                                                                                                                      | N/A   |
| 22 |                                             |                                                                                                                                                                                                                                                                                                 |       |
| 23 |                                             |                                                                                                                                                                                                                                                                                                 |       |
| 24 |                                             |                                                                                                                                                                                                                                                                                                 |       |
| 25 |                                             |                                                                                                                                                                                                                                                                                                 |       |
| 26 | Ancillary and post trial care               | <u>#30</u> Provisions, if any, for ancillary and post-trial care, and for compensation to those who suffer harm from trial participation                                                                                                                                                        | 15    |
| 27 |                                             |                                                                                                                                                                                                                                                                                                 |       |
| 28 |                                             |                                                                                                                                                                                                                                                                                                 |       |
| 29 |                                             |                                                                                                                                                                                                                                                                                                 |       |
| 30 | Dissemination policy: trial results         | <u>#31a</u> Plans for investigators and sponsor to communicate trial results to participants, healthcare professionals, the public, and other relevant groups (eg, via publication, reporting in results databases, or other data sharing arrangements), including any publication restrictions | N/A   |
| 31 |                                             |                                                                                                                                                                                                                                                                                                 |       |
| 32 |                                             |                                                                                                                                                                                                                                                                                                 |       |
| 33 |                                             |                                                                                                                                                                                                                                                                                                 |       |
| 34 |                                             |                                                                                                                                                                                                                                                                                                 |       |
| 35 |                                             |                                                                                                                                                                                                                                                                                                 |       |
| 36 |                                             |                                                                                                                                                                                                                                                                                                 |       |
| 37 |                                             |                                                                                                                                                                                                                                                                                                 |       |
| 38 | Dissemination policy: authorship            | <u>#31b</u> Authorship eligibility guidelines and any intended use of professional writers                                                                                                                                                                                                      | N/A   |
| 39 |                                             |                                                                                                                                                                                                                                                                                                 |       |
| 40 |                                             |                                                                                                                                                                                                                                                                                                 |       |
| 41 |                                             |                                                                                                                                                                                                                                                                                                 |       |
| 42 | Dissemination policy: reproducible research | <u>#31c</u> Plans, if any, for granting public access to the full protocol, participant-level dataset, and statistical code                                                                                                                                                                     | N/A   |
| 43 |                                             |                                                                                                                                                                                                                                                                                                 |       |
| 44 |                                             |                                                                                                                                                                                                                                                                                                 |       |
| 45 |                                             |                                                                                                                                                                                                                                                                                                 |       |
| 46 | Informed consent materials                  | <u>#32</u> Model consent form and other related documentation given to participants and authorised surrogates                                                                                                                                                                                   | N/A   |
| 47 |                                             |                                                                                                                                                                                                                                                                                                 |       |
| 48 |                                             |                                                                                                                                                                                                                                                                                                 |       |
| 49 |                                             |                                                                                                                                                                                                                                                                                                 |       |
| 50 | Biological specimens                        | <u>#33</u> Plans for collection, laboratory evaluation, and storage of biological specimens for genetic or molecular analysis in the current trial and for future use in ancillary studies, if applicable                                                                                       | N/A   |
| 51 |                                             |                                                                                                                                                                                                                                                                                                 |       |
| 52 |                                             |                                                                                                                                                                                                                                                                                                 |       |
| 53 |                                             |                                                                                                                                                                                                                                                                                                 |       |
| 54 |                                             |                                                                                                                                                                                                                                                                                                 |       |
| 55 |                                             |                                                                                                                                                                                                                                                                                                 |       |
| 56 |                                             |                                                                                                                                                                                                                                                                                                 |       |
| 57 |                                             |                                                                                                                                                                                                                                                                                                 |       |
| 58 |                                             |                                                                                                                                                                                                                                                                                                 |       |
| 59 |                                             |                                                                                                                                                                                                                                                                                                 |       |
| 60 |                                             |                                                                                                                                                                                                                                                                                                 |       |



# BMJ Open

## Real-time navigation during hepatectomy using fusion indocyanine green-fluorescence imaging: protocol for a prospective cohort study

|                                 |                                                                                                                                                                                                                                                                                                                                                                                                                                                                                                                                                                                                                                                                                                                                                                                                                                   |
|---------------------------------|-----------------------------------------------------------------------------------------------------------------------------------------------------------------------------------------------------------------------------------------------------------------------------------------------------------------------------------------------------------------------------------------------------------------------------------------------------------------------------------------------------------------------------------------------------------------------------------------------------------------------------------------------------------------------------------------------------------------------------------------------------------------------------------------------------------------------------------|
| Journal:                        | <i>BMJ Open</i>                                                                                                                                                                                                                                                                                                                                                                                                                                                                                                                                                                                                                                                                                                                                                                                                                   |
| Manuscript ID                   | bmjopen-2019-030233.R2                                                                                                                                                                                                                                                                                                                                                                                                                                                                                                                                                                                                                                                                                                                                                                                                            |
| Article Type:                   | Protocol                                                                                                                                                                                                                                                                                                                                                                                                                                                                                                                                                                                                                                                                                                                                                                                                                          |
| Date Submitted by the Author:   | 05-Jul-2019                                                                                                                                                                                                                                                                                                                                                                                                                                                                                                                                                                                                                                                                                                                                                                                                                       |
| Complete List of Authors:       | Gon, Hidetoshi; Kobe University Graduate School of Medicine School of Medicine, Surgery;<br>Komatsu, Shohei; Kobe University Graduate School of Medicine School of Medicine<br>Murakami, Sae; Kobe University Hospital,<br>Kido, Masahiro; Kobe University Graduate School of Medicine School of Medicine<br>Tanaka, Motofumi; Kobe University Graduate School of Medicine School of Medicine<br>Kuramitsu, Kaori; Kobe University Graduate School of Medicine School of Medicine<br>Tsugawa, Daisuke; Kobe University Graduate School of Medicine School of Medicine<br>Awazu, Masahide; Kobe University Graduate School of Medicine School of Medicine<br>Toyama, Hirochika; Kobe University Graduate School of Medicine School of Medicine<br>Fukumoto, Takumi; Kobe University Graduate School of Medicine School of Medicine |
| <b>Primary Subject Heading</b>: | Gastroenterology and hepatology                                                                                                                                                                                                                                                                                                                                                                                                                                                                                                                                                                                                                                                                                                                                                                                                   |
| Secondary Subject Heading:      | Gastroenterology and hepatology                                                                                                                                                                                                                                                                                                                                                                                                                                                                                                                                                                                                                                                                                                                                                                                                   |
| Keywords:                       | indocyanine green-fluorescence imaging, liver tumour, hepatectomy                                                                                                                                                                                                                                                                                                                                                                                                                                                                                                                                                                                                                                                                                                                                                                 |
|                                 |                                                                                                                                                                                                                                                                                                                                                                                                                                                                                                                                                                                                                                                                                                                                                                                                                                   |

SCHOLARONE™  
Manuscripts

1  
2  
3  
4 **Real-time navigation during hepatectomy using fusion indocyanine green-fluorescence**  
5  
6  
7 **imaging: protocol for a prospective cohort study**  
8  
9

10  
11  
12  
13 Hidetoshi Gon, MD, PhD<sup>a\*</sup>; Shohei Komatsu, MD, PhD<sup>a\*</sup>; Sae Murakami, MD, PhD<sup>b</sup>;

14  
15  
16 Masahiro Kido, MD, PhD<sup>a</sup>; Motofumi Tanaka, MD, PhD<sup>a</sup>; Kaori Kuramitsu, MD, PhD<sup>a</sup>;

17  
18  
19 Daisuke Tsugawa, MD, PhD<sup>a</sup>; Masahide Awazu, MD, PhD<sup>a</sup>; Hirochika Toyama, MD, PhD<sup>a</sup>;

20  
21  
22 and Takumi Fukumoto, MD, PhD<sup>a</sup>  
23  
24  
25  
26  
27

28 Department of Surgery, Division of Hepato-Biliary-Pancreatic Surgery, Kobe University

29  
30 Graduate School of Medicine<sup>a</sup>, and Clinical and Translational Research Center, Kobe

31  
32  
33 University Hospital<sup>b</sup>, Kobe, Hyogo, Japan  
34  
35  
36

37 \*These authors equally contributed to this work.  
38  
39  
40  
41  
42

43 **Corresponding author:** Hidetoshi Gon, MD, PhD, Department of Surgery, Division of

44  
45  
46 Hepato-Biliary-Pancreatic Surgery, Graduate School of Medicine, Kobe University, 7-5-2

47  
48  
49 Kusunoki-cho, Chuo-ku, Kobe 650-0017, Japan  
50  
51

52 Tel: +81-78-382-6302  
53

54 Fax: +81-78-382-6307  
55

56  
57  
58 E-mail: [hidetoshi541128@gmail.com](mailto:hidetoshi541128@gmail.com)  
59  
60

1  
2  
3  
4 2577 words  
5  
6  
7  
8  
9

10 Keywords: indocyanine green-fluorescence imaging, liver tumour, hepatectomy  
11  
12  
13  
14  
15  
16  
17  
18  
19  
20  
21  
22  
23  
24  
25  
26  
27  
28  
29  
30  
31  
32  
33  
34  
35  
36  
37  
38  
39  
40  
41  
42  
43  
44  
45  
46  
47  
48  
49  
50  
51  
52  
53  
54  
55  
56  
57  
58  
59  
60

For peer review only

## ABSTRACT

**Introduction:** In vivo fluorescence imaging techniques using indocyanine green to identify liver tumours and hepatic segment boundaries have been recently developed. The purpose of this study is to evaluate the efficacy of fusion indocyanine green (ICG)-fluorescence imaging for navigation during hepatectomy.

**Methods and analysis:** This will be an exploratory single-arm clinical trial; patients with liver tumours will undergo hepatectomy using the ICG-fluorescence imaging system. In total, 110 patients with liver tumours scheduled for elective hepatectomy will be included in this study. Preoperatively, ICG will be intravenously injected at a dose of 0.5 mg/kg body weight within 2 days. To detect liver tumours intraoperatively, the hepatic surface will be initially observed using the ICG-fluorescence imaging system. After identifying and clamping the portal pedicle corresponding to the hepatic segments, including the liver tumours to be resected, additional ICG will be injected intravenously at a dose of 0.5 mg/kg body weight to identify the boundaries of the hepatic segments. The primary outcome measure will be the success or failure of the ICG-fluorescence imaging system in identifying hepatic segments. The secondary outcomes will be the success or failure in identifying liver tumours, liver function indicators, operative time, blood loss, rate of postoperative complications, and recurrence-free survival. The findings obtained through this study are expected to help establish the utility of ICG-fluorescence imaging systems and therefore contribute to

1  
2  
3  
4 prognostic outcome improvements in patients undergoing hepatectomy for various causes.  
5  
6

7 **Ethics and dissemination:** The protocol has been approved by the Kobe University Clinical  
8  
9  
10 Research Ethical Committee. The findings of this study will be disseminated widely through  
11  
12  
13 peer-reviewed publications and conference presentations.  
14  
15

16 **Trial registration number:** This study is registered at the UMIN Clinical Trials Registry:  
17  
18 UMIN000031054 and Japan Registry of Clinical Trials: jRCT1051180070. The Registration  
19  
20  
21  
22 Data Set is available at <https://jrct.niph.go.jp/>.  
23  
24  
25  
26  
27  
28  
29  
30  
31  
32  
33  
34  
35  
36  
37  
38  
39  
40  
41  
42  
43  
44  
45  
46  
47  
48  
49  
50  
51  
52  
53  
54  
55  
56  
57  
58  
59  
60

## STRENGTHS AND LIMITATIONS OF THIS STUDY

- This study is expected to address the clinical utility of real-time navigation during hepatectomy using indocyanine green (ICG)-fluorescence imaging systems.
- The efficacy and safety of hepatectomy using ICG-fluorescence imaging systems are expected to be clarified through the analysis of associations between the success rate in identifying hepatic segments and clinical outcomes, including liver function indicators, operative time, blood loss, rate of postoperative complications, and recurrence-free survival.
- This is an exploratory single-arm study, the results of which will be compared against historical data from our facility.

## INTRODUCTION

Hepatectomy remains the mainstay of treatment for hepatocellular carcinoma (HCC) and metastatic liver tumours and is commonly performed in patients with preserved liver function.[1-3] Vascular invasion is a poor prognostic factor in HCC, and anatomical resection of the cancer-bearing portal regions is a theoretically effective procedure for the treatment of HCC and metastatic liver tumours complicated by invasion of the Glisson's capsule.[4]

To perform anatomical resection safely and precisely, the liver's anatomical boundaries must be visually recognized. Particularly, the hepatic veins are considered to indicate the absolute boundaries of hepatic segments and can easily be identified by intraoperative ultrasonography. However, due to the three-dimensional shape of the hepatic segment, the hepatic veins are not sufficient for guiding anatomical resection. Under such conditions, intraoperative navigation in hepatectomy allows for the real-time identification of three-dimensional structures, including tumours and hepatic segment boundaries.

Several techniques for identifying hepatic segments have been reported thus far.[5-9] Recently, in vivo fluorescence imaging techniques for the identification of biological structures intraoperatively have been developed. Among the various fluorophores used, indocyanine green (ICG) receives a substantial amount of attention because of its well-known pharmacokinetic and safety profile, making it a potentially valuable clinical tool.[10] For example, it is well known that ICG rapidly and completely binds to plasma proteins - among

1  
2  
3  
4 which albumin is the principal carrier - following intravenous injection. Also, ICG is excreted  
5  
6  
7 in bile in an unconjugated form and is not cleared by extrahepatic mechanisms. Furthermore,  
8  
9  
10 single or repeated intravenous injections or infusions rarely cause unfavourable adverse  
11  
12  
13 effects. Taking advantage of these characteristics and the development of concomitant  
14  
15  
16 fluorescence imaging techniques, ICG-fluorescence imaging systems are widely used for  
17  
18  
19 detecting sentinel lymph nodes and arterial blood flow, and their effectiveness has been  
20  
21  
22 recognized.[11, 12] Moreover, the potential utility of this approach to identify liver tumours  
23  
24  
25 and hepatic segment boundaries, as well as to detect the bile duct tree intraoperatively, has  
26  
27  
28 recently been demonstrated.[7, 13-19]

31 The ICG-fluorescence imaging system was initially introduced for use during open  
32  
33  
34 hepatectomy. Similar fluorescence imaging systems have been recently developed for use  
35  
36  
37 during laparoscopic hepatobiliary surgery. Several reports have demonstrated the efficacy of  
38  
39  
40 such systems during laparoscopic cholecystectomy and hepatectomy.[20] However, whether  
41  
42  
43 the hepatic boundaries visualised by ICG-fluorescence imaging systems are clinically precise  
44  
45  
46 and useful has not been adequately assessed. For example, there may be minor deviations due  
47  
48  
49 to the confluence of communicating vessel branches between hepatic segments; the injected  
50  
51  
52 ICG likely passes through the hepatic segments and the tumour to be removed. Evidence  
53  
54  
55 regarding the efficacy of ICG-fluorescence imaging systems is not fully established, and  
56  
57  
58 further investigation is required.  
59  
60



1  
2  
3  
4 The purpose of this study is to evaluate the efficacy of the ICG-fluorescence imaging  
5  
6  
7 system during hepatectomy for patients with liver tumours by analysing the rate of detection  
8  
9  
10 of hepatic boundaries and tumours. In addition, we assess the precision of the detected hepatic  
11  
12  
13 boundaries by evaluating the postoperative clinical data.  
14  
15  
16  
17  
18

## 19 **METHODS AND ANALYSIS**

### 21 **Study design**

22  
23  
24  
25 This prospective study is a single-arm, exploratory clinical trial. Patients with liver  
26  
27  
28 tumours will undergo hepatectomy using the ICG-fluorescence imaging system. This study  
29  
30  
31 will be performed at Kobe University.  
32  
33  
34  
35  
36

### 37 **Target population**

38  
39  
40 From 2018 to 2020, patients with liver tumours treated at Kobe University will be  
41  
42  
43 enrolled. The inclusion criteria are as follows: male or female patients with liver tumours,  
44  
45  
46 aged 20 years and older, scheduled for elective hepatectomy, have preserved liver function,  
47  
48  
49 able to understand the nature of the study procedures, and willing to participate and give  
50  
51  
52 voluntary written consent. Liver functional reserve will be assessed by serum biochemical  
53  
54  
55 data (albumin level, total bilirubin level, and prothrombin time) and ICG retention for 15  
56  
57  
58 minutes (ICG-R15). The patients will be categorized according to the severity of liver disease  
59  
60

1  
2  
3  
4 based on Child-Pugh stages and the liver damage classification, defined by the Liver Cancer  
5  
6  
7 Study Group of Japan.[21, 22] Preserved liver function is defined as ICG-R15 <15% and a  
8  
9  
10 Child-Pugh classification of A or B.

11  
12  
13 The exclusion criteria are as follows: has liver or renal insufficiency, or known ICG  
14  
15  
16 hypersensitivity, pregnant or breastfeeding, or unable to understand the nature of the study  
17  
18  
19 procedure.

## 20 21 22 23 24 25 **Intervention**

26  
27  
28 ICG is injected intravenously at a dose of 0.5 mg/kg body weight within 2 days  
29  
30  
31 preoperatively. Intraoperatively, we will initially observe the hepatic surface using a fusion  
32  
33  
34 ICG-fluorescence imaging system (PINPOINT; Stryker, Kalamazoo, MI, US) to detect liver  
35  
36  
37 tumours. Among several methods for identifying liver segments with fluorescence imaging,  
38  
39  
40 we will use the negative staining technique to identify the liver segments in this study.[23]

41  
42  
43 After identifying and clamping the portal pedicle corresponding to the hepatic segments to be  
44  
45  
46 removed, additional ICG is injected intravenously at a dose of 0.5 mg/kg body weight to  
47  
48  
49 identify the boundaries of the hepatic segments.[24] Hepatectomy is performed based on the  
50  
51  
52 demarcation between fluorescing and non-fluorescing areas, which are assumed to be the  
53  
54  
55 boundaries of the hepatic segments. The demarcation will also be checked as continuously as  
56  
57  
58 possible during parenchymal resection. Parenchymal resection will be performed using an  
59  
60

1  
2  
3  
4 ultrasonic surgical aspirator (CUSA; Cavitron Lasersonic Corp., Stamford, CT, USA), and a  
5  
6  
7 bipolar clamp coagulation system (ERBE, Tübingen, Germany). The fusion ICG-fluorescence  
8  
9  
10 images will only be used for the hepatectomy. The Pringle manoeuvre will be performed and  
11  
12  
13 a drainage tube will be routinely inserted around the cut surface of the liver parenchyma.  
14  
15  
16  
17  
18

### 19 **Sample size calculation**

20  
21  
22 The purpose of the primary analysis of this study is to estimate the success rate, which is  
23  
24 defined as the proportion of hepatic segments identified by the ICG-fluorescence imaging  
25  
26 system during hepatectomy. In order to judge the procedure as useful, a success rate of at least  
27  
28 80% is thought to be required. When the expected success rate is 90% and the two-sided 95%  
29  
30 confidence interval width is 0.12, the required number of participants is 98. To allow for an  
31  
32 approximately 10% dropout, the target sample size of this study has been set to 110.  
33  
34  
35  
36  
37  
38  
39  
40  
41  
42

### 43 **Outcome measures**

#### 44 *Primary endpoint*

45  
46  
47  
48 The primary endpoint is the success and failure of identifying hepatic segments using the  
49  
50 ICG-fluorescence imaging system. We will evaluate the identification of hepatic segments at  
51  
52 two points: observation of the liver surface and the hepatic transection surface. We assume  
53  
54 that identification is successful when fulfilling the following two criteria:  
55  
56  
57  
58  
59  
60

1  
2  
3  
4 (1) Hepatic surface  
5  
6

7 Identification of hepatic segments by the ICG-fluorescence imaging system is considered  
8  
9  
10 successful when the demarcation between fluorescing and non-fluorescing areas is consistent  
11  
12  
13 with the ischemic demarcation area observed by clamping the portal pedicle.  
14  
15

16 (2) Hepatic transection surface  
17  
18

19 Hepatic parenchymal resection is performed based on the demarcation between  
20  
21  
22 fluorescing and non-fluorescing areas, which are assumed to be the boundaries of the hepatic  
23  
24  
25 segments. We divide the time taken to perform parenchymal resection into three equal  
26  
27  
28 intervals by reviewing the recorded videos after surgery, and the identification of hepatic  
29  
30  
31 segment boundaries is evaluated at each interval. Identification of hepatic segments is  
32  
33  
34 considered successful when we can identify the hepatic segments in more than 80% of the  
35  
36  
37 transected area during parenchymal resection at more than two intervals.  
38  
39  
40  
41  
42

43 *Secondary endpoints*  
44  
45

46 The secondary endpoints are the success and failure of identifying liver tumours by the  
47  
48  
49 ICG-fluorescence imaging system, liver function indicators (alanine transaminase, albumin,  
50  
51  
52 total bilirubin, international normalized ratio of prothrombin time, platelet count), the  
53  
54  
55 operative time, the blood loss, the rate of postoperative complications, and recurrence-free  
56  
57  
58 survival. Successful identification of liver tumours is determined when any isolated  
59  
60

1  
2  
3  
4 fluorescence signals are detected, also considering liver tumours diagnosed by other  
5  
6  
7 modalities, including preoperative imaging and IOUS, and finally confirmed by pathological  
8  
9  
10 examination. The fluorescence pattern is considered according to the preoperative diagnosis  
11  
12  
13 because liver lesions have differing fluorescence patterns on the basis of their tumour  
14  
15  
16 biology.[25] If we identify lesions with isolated fluorescence signal on fusion-fluorescence  
17  
18  
19 imaging that were not identified by preoperative imaging, we evaluate the lesions by  
20  
21  
22 intraoperative ultrasound sonography, and, if necessary, frozen section biopsies are performed  
23  
24  
25 to determine whether additional hepatectomy is required. The recurrence-free survival is  
26  
27  
28 analysed for each case of liver tumour, including primary liver cancer and liver metastases.  
29  
30  
31 Recurrence-free survival time is defined as the time from enrolment until first recurrence after  
32  
33  
34 the surgical intervention. Patients without recurrence will be censored at the date of last  
35  
36  
37 confirmation of recurrence-free status. Patients lost to follow-up without a diagnosis of  
38  
39  
40 recurrence and those who die will be censored at the date of last confirmation of recurrence-  
41  
42  
43 free status.  
44  
45  
46  
47  
48

### 49 **Data collection**

50  
51  
52 Three experienced surgeons will judge the intraoperative identification of hepatic  
53  
54  
55 segment boundaries. The entire surgical procedure, including ICG-fluorescence imaging, will  
56  
57  
58 be digitally recorded and analysed by an additional expert panel consisting of three highly  
59  
60

1  
2  
3  
4 experienced surgeons, different from those performing the surgeries, to confirm the  
5  
6  
7 identification of hepatic segment boundaries. The success rate of their identification is used as  
8  
9  
10 the end point. A flow chart of the study procedure is presented in Figure 1.  
11  
12

13 Postoperative complications will be graded according to the extended Clavien-Dindo  
14  
15  
16 classification of surgical complications, which was published by the Japan Clinical Oncology  
17  
18  
19 Group and more precisely described in the original criteria of the Clavien-Dindo  
20  
21  
22 classification.[26, 27]  
23  
24

25 Follow-up visits will be carried out at two weeks after hospital discharge, and every  
26  
27  
28 three months thereafter. Follow-up evaluation will be performed using routine blood tests,  
29  
30  
31 including liver function tests, coagulation function tests, serum tumour maker levels  
32  
33  
34 depending on the type of liver tumour, abdominal ultrasonography, and abdominal enhanced  
35  
36  
37 computed tomography.  
38  
39  
40  
41  
42

### 43 **Study timeline**

44

45  
46 Data will be collected from February 2018 to January 2020, and analysis is estimated to  
47  
48  
49 be completed by January 2022.  
50  
51

52 Participants will be informed about the study during their preoperative visit to our  
53  
54  
55 hospital, and will have ample time to consider participation. Possible complications will be  
56  
57  
58 evaluated in the year following the surgery. The schedules of enrolment, interventions, and  
59  
60

1  
2  
3  
4 assessments are shown in Table 1.  
5  
6  
7  
8  
9

### 10 **Statistical analysis**

11  
12  
13 The analysis populations will include the following three sets. Firstly, the full analysis  
14  
15  
16 set (FAS) will consist of all participants who completed the surgery with navigation by ICG-  
17  
18  
19 fluorescence images and have efficacy data available, excluding those who have missing  
20  
21  
22 baseline data or have had significant protocol violations (e.g., absence of informed consent,  
23  
24  
25 enrolment outside the contract period). Secondly, the per protocol set (PPS) will consist of  
26  
27  
28 the FAS participants completing 1 year of follow-up, excluding those with any significant  
29  
30  
31 protocol violations involving the study method, the inclusion criteria, the exclusion criteria,  
32  
33  
34 and concomitant therapy. Lastly, the safety analysis set (SAS) will consist of the participants  
35  
36  
37 who enrolled in this study and were given at least one dose of ICG.  
38  
39

40 The analysis will be performed after the data lock following completion of study drug  
41  
42  
43 administration to all participants. For all efficacy endpoints, the FAS will be used in the  
44  
45  
46 primary analysis, while the PPS will be used in a reference analysis. Safety will be analysed  
47  
48  
49 using the SAS. The baseline distribution of participant characteristics and summary statistics  
50  
51  
52 will be calculated according to group in each analysis population.  
53  
54

55 All statistical analyses will be performed as indicated using JMP software, version  
56  
57  
58 13.0.0 (SAS Institute, Inc., Cary, NC, USA).  
59  
60

1  
2  
3  
4 Interim analyses will not be performed in this study.  
5  
6  
7  
8  
9

10 *Primary outcome*  
11  
12

13 The primary objective of this study is to estimate the success rate, which is defined as the  
14  
15 proportion of hepatic segments identified by the ICG-fluorescence imaging system. The point  
16  
17 estimate of the rate and the 95% confidence interval (CI) will be calculated.  
18  
19  
20  
21  
22  
23  
24

25 *Secondary outcomes*  
26  
27

28 The point estimate and 95% CI of the success rate of tumour detection by the ICG-  
29  
30 fluorescence imaging system will be calculated. For analysis of other secondary outcomes, we  
31  
32 will conduct a test using historical data collected at our facility as the control group. No  
33  
34 multiplicity adjustment will be performed in the analysis of secondary efficacy endpoints. We  
35  
36 will estimate the recurrence-free survival by the Kaplan Meier method. The recurrence-free  
37  
38 survival will also be analysed by univariate COX proportional hazard model for each clinical  
39  
40 variable. Multivariate Cox proportional hazard models will be adopted to analyse the risk  
41  
42 factors of recurrence-free survival. The following variables will be included in the  
43  
44 multivariate model: the success or failure of identifying liver segments using the ICG  
45  
46 fluorescence imaging system and other variables for which the p-value is under 0.05 in the  
47  
48 univariate analysis.  
49  
50  
51  
52  
53  
54  
55  
56  
57  
58  
59  
60



### *Safety analysis*

The safety endpoint of this study is the frequency of adverse events. A table will be prepared to summarize the endpoint. For estimation of the rates of adverse events, a two-sided 95% CI will be calculated.

### **Data monitoring**

Monitoring will be performed in order to periodically check whether the study is being conducted safely in accordance with the protocol and whether the data are properly collected. The following items are reviewed every six months: informed consent, obtained and signed; participant retention; study implementation system; study safety and data; and study progress.

### **Patient and Public involvement**

There was no patient and/or public involvement in planning of this study.

## **ETHICS AND DISSEMINATION**

### **Is there scientific and clinical value in conducting this study?**

Whereas the conventional pedicle clamping method can only detect hepatic boundaries from the hepatic surface, the ICG-fluorescence imaging system can detect both the hepatic

1  
2  
3  
4 surface and transection surface during parenchymal resection. We can evaluate the efficacy  
5  
6  
7 and safety of hepatectomy using ICG-fluorescence imaging systems by analysing the  
8  
9  
10 association between the success rate of identifying hepatic segments and clinical outcomes.  
11  
12  
13 This study will help to determine whether the boundaries detected by ICG-fluorescence  
14  
15  
16 imaging systems during hepatectomy are valid and useful.  
17  
18

19 The findings obtained through this study will help to establish the utility of ICG-  
20  
21  
22 fluorescence imaging systems and therefore the study is expected to contribute to the  
23  
24  
25 improvement of prognostic outcomes in patients who undergo hepatectomy due to various  
26  
27  
28 causes.  
29  
30  
31  
32  
33

### 34 **Ethical approval**

35  
36  
37 This study was approved by the Kobe University Clinical Research Ethical Committee.  
38  
39  
40 Possible protocol amendments will be sent to the Kobe University Clinical Research Ethical  
41  
42  
43 Committee.  
44  
45  
46  
47  
48  
49

### 50 **Consideration of participants' human rights, safety, and disadvantages**

51  
52 The principal investigator and sub-investigators will comply with the principals of the  
53  
54  
55 protection of participants' privacy rights. Study personnel will make the utmost effort to  
56  
57  
58 protect the participants' personal information and privacy, and will not divulge any personal  
59  
60

1  
2  
3  
4 information learned from this study without due reasons, even outside working hours. In this  
5  
6  
7 study, a list of subject identification codes will be prepared to link the subject source data  
8  
9  
10 with the study database or study-related documents. Limited participant information, such as  
11  
12  
13 sex and date of birth, may be used to identify participants or verify the list of subject  
14  
15  
16 identification codes, within the range of all applicable laws and regulations.

17  
18  
19 All effort will be taken to ensure that participants will not be personally identifiable from  
20  
21  
22 publications arising from this study.  
23  
24  
25  
26  
27

### 28 **Foreseeable disadvantages (burdens and risks)**

29  
30  
31 The administration of ICG will be the only additional invasive intervention performed in  
32  
33  
34 each patient. ICG administration rarely causes anaphylactic reactions (<1:10,000). Patients  
35  
36  
37 with terminal renal insufficiency seem to be more prone to such an anaphylactic reaction. The  
38  
39  
40 estimated mortality rate due to anaphylactic reaction is reported as <1 per 330,000.[28-31]  
41  
42

43 To minimize the risk of adverse events and disadvantages that may occur in this study,  
44  
45  
46 the inclusion and exclusion criteria have been carefully discussed. All adverse events  
47  
48  
49 occurring in this study will be monitored to ensure that they are within the expected range. If  
50  
51  
52 any serious or unexpected adverse events occur, the event will be carefully examined and  
53  
54  
55 reviewed, and necessary countermeasures will be taken. Participation in this study may  
56  
57  
58 require increased hospital visits, test frequency, and blood sampling volume, compared to  
59  
60

1  
2  
3  
4 routine medical care. In the event of tumour progression, severe organ dysfunction, physical  
5  
6  
7 weakening, etc., during the preoperative treatment or during the waiting period for surgical  
8  
9  
10 resection, the planned surgical resection may not be possible.  
11  
12  
13  
14  
15

## 16 REFERENCES

- 17  
18  
19 1. Fong ZV, Tanabe KK. The clinical management of hepatocellular carcinoma in the  
20  
21 United  
22  
23 States, Europe, and Asia: a comprehensive and evidence-based comparison and review.  
24  
25 Cancer 2014;120:2824-38.  
26  
27  
28  
29  
30 2. Kopetz S, Chang GJ, Overman MJ, et al. Improved survival in metastatic colorectal  
31  
32 cancer is associated with adoption of hepatic resection and improved chemotherapy. Journal  
33  
34 of clinical oncology : official journal of the American Society of Clinical Oncology  
35  
36  
37 2009;27:3677-83.  
38  
39  
40  
41  
42 3. Watanabe T, Itabashi M, Shimada Y, et al. Japanese Society for Cancer of the Colon and  
43  
44 Rectum (JSCCR) Guidelines 2014 for treatment of colorectal cancer. International journal  
45  
46 of clinical oncology 2015;20:207-39.  
47  
48  
49  
50  
51 4. Hasegawa K, Kokudo N, Imamura H, et al. Prognostic impact of anatomic resection for  
52  
53 hepatocellular carcinoma. Ann Surg 2005;242:252-9.  
54  
55  
56  
57 5. Makuuchi M, Hasegawa H, Yamazaki S. Ultrasonically guided subsegmentectomy.  
58  
59  
60

1  
2  
3  
4 Surgery, gynecology & obstetrics 1985;161:346-50.  
5

6  
7 6. Takasaki K. Glissonean pedicle transection method for hepatic resection: a new concept of  
8  
9  
10 liver segmentation. Journal of hepato-biliary-pancreatic surgery 1998;5:286-91.  
11

12  
13 7. Aoki T, Yasuda D, Shimizu Y, et al. Image-guided liver mapping using fluorescence  
14  
15  
16 navigation system with indocyanine green for anatomical hepatic resection. World J Surg  
17  
18  
19 2008;32:1763-7.  
20

21  
22 8. Ahn KS, Kang KJ, Park TJ, et al. Benefit of systematic segmentectomy of the  
23  
24  
25 hepatocellular carcinoma: revisiting the dye injection method for various portal vein  
26  
27  
28 branches. Ann Surg 2013;258:1014-21.  
29

30  
31 9. Hallet J, Gayet B, Tsung A, et al. Systematic review of the use of pre-operative simulation  
32  
33  
34 and navigation for hepatectomy: current status and future perspectives. Journal of hepato-  
35  
36  
37 biliary-pancreatic sciences 2015;22:353-62.  
38

39  
40 10. Cherrick GR, Stein SW, Leevy CM, et al. Indocyanine green: observations on its physical  
41  
42  
43 properties, plasma decay, and hepatic extraction. J Clin Invest 1960;39:592-600.  
44

45  
46 11. Kitai T, Inomoto T, Miwa M, et al. Fluorescence navigation with indocyanine green for  
47  
48  
49 detecting sentinel lymph nodes in breast cancer. Breast cancer (Tokyo, Japan)  
50  
51  
52 2005;12:211-5.  
53

54  
55 12. Reuthebuch O, Haussler A, Genoni M, et al. Novadaq SPY: intraoperative quality  
56  
57  
58 assessment in off-pump coronary artery bypass grafting. Chest 2004;125:418-24.  
59  
60

- 1  
2  
3  
4 13. Ishizawa T, Fukushima N, Shibahara J, et al. Real-time identification of liver cancers by  
5  
6  
7 using indocyanine green fluorescent imaging. *Cancer* 2009;115:2491-504.  
8  
9  
10 14. Gotoh K, Yamada T, Ishikawa O, et al. A novel image-guided surgery of hepatocellular  
11  
12  
13 carcinoma by indocyanine green fluorescence imaging navigation. *Journal of surgical*  
14  
15  
16 oncology 2009;100:75-9.  
17  
18  
19 15. Ishizawa T, Bandai Y, Ijichi M, et al. Fluorescent cholangiography illuminating the biliary  
20  
21  
22 tree during laparoscopic cholecystectomy. *The British journal of surgery* 2010;97:1369-77.  
23  
24  
25 16. Kaibori M, Ishizaki M, Matsui K, et al. Intraoperative indocyanine green fluorescent  
26  
27  
28 imaging for prevention of bile leakage after hepatic resection. *Surgery* 2011;150:91-8.  
29  
30  
31 17. van der Vorst JR, Schaafsma BE, Hutteman M, et al. Near-infrared fluorescence-guided  
32  
33  
34 resection of colorectal liver metastases. *Cancer* 2013;119:3411-8.  
35  
36  
37 18. Inoue Y, Arita J, Sakamoto T, et al. Anatomical Liver Resections Guided by 3-  
38  
39  
40 Dimensional Parenchymal Staining Using Fusion Indocyanine Green Fluorescence Imaging.  
41  
42  
43 *Ann Surg* 2015;262:105-11.  
44  
45  
46 19. Miyata A, Ishizawa T, Tani K, et al. Reappraisal of a Dye-Staining Technique for  
47  
48  
49 Anatomic Hepatectomy by the Concomitant Use of Indocyanine Green Fluorescence  
50  
51  
52 Imaging. *J Am Coll Surg* 2015;221:e27-36.  
53  
54  
55 20. Spinoglio G, Priora F, Bianchi PP, et al. Real-time near-infrared (NIR) fluorescent  
56  
57  
58 cholangiography in single-site robotic cholecystectomy (SSRC): a single-institutional  
59  
60

1  
2  
3  
4 prospective study. *Surg Endosc* 2013;27:2156-62.  
5  
6

7 21. Pugh RN, Murray-Lyon IM, Dawson JL, et al. *Br J Surg* 1973 Aug;60:646-9.  
8  
9

10 22. The liver Cancer Study Group of Japan. *The General Rules of the Clinical and*  
11  
12  
13 *Pathological Study of Primary Liver Cancer*. 3rd ed. Tokyo: Kanehara; 2010, 1-110  
14  
15

16 23. Kobayashi Y, Kawaguchi Y, Kobayashi K, et al. Portal vein territory identification using  
17  
18  
19 indocyanine green fluorescence imaging: Technical details and short-term outcomes. *J Surg*  
20  
21  
22 *Oncol*. 2017;116:921-31.  
23  
24

25 24. Uchiyama K, Ueno M, Ozawa S, et al. Combined intraoperative use of contrast-enhanced  
26  
27  
28 ultrasonography imaging using a sonazoid and fluorescence navigation system with  
29  
30  
31 indocyanine green during anatomical hepatectomy. *Langenbecks Arch Surg*. 2011;396:1101-  
32  
33  
34 7.  
35  
36

37 25. Abo T, Nanashima A, Tobinaga S, et al. Usefulness of intraoperative diagnosis of hepatic  
38  
39  
40 tumors located at the liver surface and hepatic segmental visualization using indocyanine  
41  
42  
43 green-photodynamic eye imaging. *Eur J Surg Oncol*. 2015;41:257-64.  
44  
45

46 26. Dindo D, Demartines N, Clavien P-A. Classification of Surgical Complications. *Annals of*  
47  
48  
49 *Surgery* 2004;240:205-13.  
50  
51

52 27. Katayama H, Kurokawa Y, Nakamura K, et al. Extended Clavien-Dindo classification of  
53  
54  
55 surgical complications: Japan Clinical Oncology Group postoperative complications criteria.  
56  
57  
58 *Surg Today* 2016;46:668-85.  
59  
60

1  
2  
3  
4 28. Benya R, Quintana J, Brundage B. Adverse reactions to indocyanine green: a case report  
5  
6  
7 and a review of the literature. *Catheterization and cardiovascular diagnosis* 1989;17:231-3.  
8

9  
10 29. Wolf S, Arend O, Schulte K, et al. Severe anaphylactic reaction after indocyanine green  
11  
12  
13 fluorescence angiography. *American journal of ophthalmology* 1992;114:638-9.  
14

15  
16 30. Hope-Ross M, Yannuzzi LA, Gragoudas ES, et al. Adverse reactions due to indocyanine  
17  
18  
19 green. *Ophthalmology* 1994;101:529-33.  
20

21  
22 31. van den Bos J, Schols RM, Luyer MD, et al. Near-infrared fluorescence cholangiography  
23  
24  
25 assisted laparoscopic cholecystectomy versus conventional laparoscopic cholecystectomy  
26  
27  
28 (FALCON trial): study protocol for a multicentre randomised controlled trial. *BMJ open*  
29  
30  
31 2016;6:e011668.  
32

### 33 34 35 36 37 **AUTHOR STATEMENT**

38  
39  
40 H. Gon, S. Komatsu, S. Murakami, M. Kido, M. Tanaka, K. Kuramitsu, D. Tsugawa, M.  
41  
42  
43 Awazu, H. Toyama, and T. Fukumoto all made substantial contributions to the conception  
44  
45  
46 and design of the study. H. Gon, S. Komatsu, and S. Murakami drafted the manuscript. All  
47  
48  
49 authors provided critical review and final approval of the present manuscript.  
50

### 51 52 53 54 55 **FUNDING STATEMENT**

56  
57  
58 This research received no specific grant from any funding agency in the public,  
59  
60



1  
2  
3  
4 commercial, or not-for-profit sectors.  
5  
6  
7  
8  
9

#### 10 **DATA SHARING STATEMENT**

11  
12

13 This is a research protocol. That means the data for this study are being collected  
14  
15 currently. All authors have access to these data, and these data will be published as described  
16  
17 in the protocol, coordinated by H. Gon and S. Komatsu.  
18  
19  
20  
21  
22  
23  
24

#### 25 **COMPETING INTERESTS STATEMENT**

26  
27

28 None declared.  
29  
30  
31  
32  
33

#### 34 **FIGURE LEGENDS**

35  
36

37 **Figure 1.** Flowchart of the study procedures. ICG, indocyanine green.  
38  
39  
40  
41  
42  
43  
44  
45  
46  
47  
48  
49  
50  
51  
52  
53  
54  
55  
56  
57  
58  
59  
60

Table 1. Schedule of enrolment, interventions, and assessments.

| <b>STUDY PERIOD</b>                |                                    |                |                |               |                  |                                |
|------------------------------------|------------------------------------|----------------|----------------|---------------|------------------|--------------------------------|
|                                    | Within 14 days before registration | Before surgery | Day of surgery | After surgery | Day of discharge | Every 3 months after discharge |
| <b>ENROLMENT</b>                   |                                    |                |                |               |                  |                                |
| Eligibility screen                 | X                                  |                |                |               |                  |                                |
| Informed consent                   | X                                  |                |                |               |                  |                                |
| Background Blood test              | X                                  |                |                |               |                  |                                |
| <b>INTERVENTIONS</b>               |                                    |                |                |               |                  |                                |
| ICG-fluorescence imaging technique |                                    |                | X              |               |                  |                                |
| <b>ASSESSMENTS</b>                 |                                    |                |                |               |                  |                                |
| Primary outcome                    |                                    |                | X              | X             |                  |                                |
| Blood test                         |                                    | X              | X              | X             | X                | X                              |
| Postoperative complication         |                                    |                | X              | X             | X                |                                |
| Adverse event                      |                                    |                | X              | X             | X                |                                |
| Abdominal ultrasonography          |                                    |                |                |               |                  | X                              |
| Abdominal enhanced CT              |                                    |                |                |               |                  | X                              |

CT, computed tomography; ICG, indocyanine green.

1  
2  
3  
4  
5  
6  
7  
8  
9  
10  
11  
12  
13  
14  
15  
16  
17  
18  
19  
20  
21  
22  
23  
24  
25  
26  
27  
28  
29  
30  
31  
32  
33  
34  
35  
36  
37  
38  
39  
40  
41  
42  
43  
44  
45  
46  
47  
48  
49  
50  
51  
52  
53  
54  
55  
56  
57  
58  
59  
60



**Figure 1.** Flowchart of the study procedures.

Figure 1

1200x900mm (96 x 96 DPI)

# Reporting checklist for protocol of a clinical trial.

Based on the SPIRIT guidelines.

|                                                         |            | Reporting Item                                                                                                                                                                                                                                                                           | Page Number |
|---------------------------------------------------------|------------|------------------------------------------------------------------------------------------------------------------------------------------------------------------------------------------------------------------------------------------------------------------------------------------|-------------|
| Title                                                   | <u>#1</u>  | Descriptive title identifying the study design, population, interventions, and, if applicable, trial acronym                                                                                                                                                                             | 1           |
| Trial registration                                      | <u>#2a</u> | Trial identifier and registry name. If not yet registered, name of intended registry                                                                                                                                                                                                     | 4           |
| Trial registration: data set                            | <u>#2b</u> | All items from the World Health Organization Trial Registration Data Set                                                                                                                                                                                                                 | 4           |
| Protocol version                                        | <u>#3</u>  | Date and version identifier                                                                                                                                                                                                                                                              | 4           |
| Funding                                                 | <u>#4</u>  | Sources and types of financial, material, and other support                                                                                                                                                                                                                              | 22          |
| Roles and responsibilities: contributorship             | <u>#5a</u> | Names, affiliations, and roles of protocol contributors                                                                                                                                                                                                                                  | 21,22       |
| Roles and responsibilities: sponsor contact information | <u>#5b</u> | Name and contact information for the trial sponsor                                                                                                                                                                                                                                       | N/A         |
| Roles and responsibilities: sponsor and funder          | <u>#5c</u> | Role of study sponsor and funders, if any, in study design; collection, management, analysis, and interpretation of data; writing of the report; and the decision to submit the report for publication, including whether they will have ultimate authority over any of these activities | N/A         |
| Roles and responsibilities: committees                  | <u>#5d</u> | Composition, roles, and responsibilities of the coordinating centre, steering committee, endpoint adjudication committee, data management team, and other individuals or groups overseeing the trial, if applicable (see Item 21a for data monitoring committee)                         | N/A         |

|    |                      |             |                                                                     |       |
|----|----------------------|-------------|---------------------------------------------------------------------|-------|
| 1  | Background and       | <u>#6a</u>  | Description of research question and justification for undertaking  | 6-8   |
| 2  | rationale            |             | the trial, including summary of relevant studies (published and     |       |
| 3  |                      |             | unpublished) examining benefits and harms for each intervention     |       |
| 4  |                      |             |                                                                     |       |
| 5  |                      |             |                                                                     |       |
| 6  | Background and       | <u>#6b</u>  | Explanation for choice of comparators                               | N/A   |
| 7  | rationale: choice of |             |                                                                     |       |
| 8  | comparators          |             |                                                                     |       |
| 9  |                      |             |                                                                     |       |
| 10 |                      |             |                                                                     |       |
| 11 | Objectives           | <u>#7</u>   | Specific objectives or hypotheses                                   | 8     |
| 12 |                      |             |                                                                     |       |
| 13 |                      |             |                                                                     |       |
| 14 | Trial design         | <u>#8</u>   | Description of trial design including type of trial (eg, parallel   | 8     |
| 15 |                      |             | group, crossover, factorial, single group), allocation ratio, and   |       |
| 16 |                      |             | framework (eg, superiority, equivalence, non-inferiority,           |       |
| 17 |                      |             | exploratory)                                                        |       |
| 18 |                      |             |                                                                     |       |
| 19 |                      |             |                                                                     |       |
| 20 |                      |             |                                                                     |       |
| 21 | Study setting        | <u>#9</u>   | Description of study settings (eg, community clinic, academic       | 8     |
| 22 |                      |             | hospital) and list of countries where data will be collected.       |       |
| 23 |                      |             | Reference to where list of study sites can be obtained              |       |
| 24 |                      |             |                                                                     |       |
| 25 |                      |             |                                                                     |       |
| 26 | Eligibility criteria | <u>#10</u>  | Inclusion and exclusion criteria for participants. If applicable,   | 8,9   |
| 27 |                      |             | eligibility criteria for study centres and individuals who will     |       |
| 28 |                      |             | perform the interventions (eg, surgeons, psychotherapists)          |       |
| 29 |                      |             |                                                                     |       |
| 30 |                      |             |                                                                     |       |
| 31 | Interventions:       | <u>#11a</u> | Interventions for each group with sufficient detail to allow        | 9     |
| 32 | description          |             | replication, including how and when they will be administered       |       |
| 33 |                      |             |                                                                     |       |
| 34 |                      |             |                                                                     |       |
| 35 | Interventions:       | <u>#11b</u> | Criteria for discontinuing or modifying allocated interventions for | 16    |
| 36 | modifications        |             | a given trial participant (eg, drug dose change in response to      |       |
| 37 |                      |             | harms, participant request, or improving / worsening disease)       |       |
| 38 |                      |             |                                                                     |       |
| 39 |                      |             |                                                                     |       |
| 40 | Interventions:       | <u>#11c</u> | Strategies to improve adherence to intervention protocols, and any  | N/A   |
| 41 | adherence            |             | procedures for monitoring adherence (eg, drug tablet return;        |       |
| 42 |                      |             | laboratory tests)                                                   |       |
| 43 |                      |             |                                                                     |       |
| 44 |                      |             |                                                                     |       |
| 45 | Interventions:       | <u>#11d</u> | Relevant concomitant care and interventions that are permitted or   | N/A   |
| 46 | concomitant care     |             | prohibited during the trial                                         |       |
| 47 |                      |             |                                                                     |       |
| 48 |                      |             |                                                                     |       |
| 49 | Outcomes             | <u>#12</u>  | Primary, secondary, and other outcomes, including the specific      | 10,11 |
| 50 |                      |             | measurement variable (eg, systolic blood pressure), analysis metric |       |
| 51 |                      |             | (eg, change from baseline, final value, time to event), method of   |       |
| 52 |                      |             | aggregation (eg, median, proportion), and time point for each       |       |
| 53 |                      |             | outcome. Explanation of the clinical relevance of chosen efficacy   |       |
| 54 |                      |             | and harm outcomes is strongly recommended                           |       |
| 55 |                      |             |                                                                     |       |
| 56 |                      |             |                                                                     |       |
| 57 |                      |             |                                                                     |       |
| 58 |                      |             |                                                                     |       |
| 59 |                      |             |                                                                     |       |
| 60 |                      |             |                                                                     |       |

|    |                                          |             |                                                                                                                                                                                                                                                                                                                                                                                                              |       |
|----|------------------------------------------|-------------|--------------------------------------------------------------------------------------------------------------------------------------------------------------------------------------------------------------------------------------------------------------------------------------------------------------------------------------------------------------------------------------------------------------|-------|
| 1  | Participant timeline                     | <u>#13</u>  | Time schedule of enrolment, interventions (including any run-ins and washouts), assessments, and visits for participants. A schematic diagram is highly recommended (see Figure)                                                                                                                                                                                                                             | 12,13 |
| 2  |                                          |             |                                                                                                                                                                                                                                                                                                                                                                                                              |       |
| 3  |                                          |             |                                                                                                                                                                                                                                                                                                                                                                                                              |       |
| 4  |                                          |             |                                                                                                                                                                                                                                                                                                                                                                                                              |       |
| 5  |                                          |             |                                                                                                                                                                                                                                                                                                                                                                                                              |       |
| 6  | Sample size                              | <u>#14</u>  | Estimated number of participants needed to achieve study objectives and how it was determined, including clinical and statistical assumptions supporting any sample size calculations                                                                                                                                                                                                                        | 10    |
| 7  |                                          |             |                                                                                                                                                                                                                                                                                                                                                                                                              |       |
| 8  |                                          |             |                                                                                                                                                                                                                                                                                                                                                                                                              |       |
| 9  |                                          |             |                                                                                                                                                                                                                                                                                                                                                                                                              |       |
| 10 |                                          |             |                                                                                                                                                                                                                                                                                                                                                                                                              |       |
| 11 | Recruitment                              | <u>#15</u>  | Strategies for achieving adequate participant enrolment to reach target sample size                                                                                                                                                                                                                                                                                                                          | 10    |
| 12 |                                          |             |                                                                                                                                                                                                                                                                                                                                                                                                              |       |
| 13 |                                          |             |                                                                                                                                                                                                                                                                                                                                                                                                              |       |
| 14 |                                          |             |                                                                                                                                                                                                                                                                                                                                                                                                              |       |
| 15 | Allocation: sequence generation          | <u>#16a</u> | Method of generating the allocation sequence (eg, computer-generated random numbers), and list of any factors for stratification. To reduce predictability of a random sequence, details of any planned restriction (eg, blocking) should be provided in a separate document that is unavailable to those who enrol participants or assign interventions                                                     | N/A   |
| 16 |                                          |             |                                                                                                                                                                                                                                                                                                                                                                                                              |       |
| 17 |                                          |             |                                                                                                                                                                                                                                                                                                                                                                                                              |       |
| 18 |                                          |             |                                                                                                                                                                                                                                                                                                                                                                                                              |       |
| 19 |                                          |             |                                                                                                                                                                                                                                                                                                                                                                                                              |       |
| 20 |                                          |             |                                                                                                                                                                                                                                                                                                                                                                                                              |       |
| 21 |                                          |             |                                                                                                                                                                                                                                                                                                                                                                                                              |       |
| 22 |                                          |             |                                                                                                                                                                                                                                                                                                                                                                                                              |       |
| 23 |                                          |             |                                                                                                                                                                                                                                                                                                                                                                                                              |       |
| 24 |                                          |             |                                                                                                                                                                                                                                                                                                                                                                                                              |       |
| 25 | Allocation concealment mechanism         | <u>#16b</u> | Mechanism of implementing the allocation sequence (eg, central telephone; sequentially numbered, opaque, sealed envelopes), describing any steps to conceal the sequence until interventions are assigned                                                                                                                                                                                                    | N/A   |
| 26 |                                          |             |                                                                                                                                                                                                                                                                                                                                                                                                              |       |
| 27 |                                          |             |                                                                                                                                                                                                                                                                                                                                                                                                              |       |
| 28 |                                          |             |                                                                                                                                                                                                                                                                                                                                                                                                              |       |
| 29 |                                          |             |                                                                                                                                                                                                                                                                                                                                                                                                              |       |
| 30 |                                          |             |                                                                                                                                                                                                                                                                                                                                                                                                              |       |
| 31 |                                          |             |                                                                                                                                                                                                                                                                                                                                                                                                              |       |
| 32 | Allocation: implementation               | <u>#16c</u> | Who will generate the allocation sequence, who will enrol participants, and who will assign participants to interventions                                                                                                                                                                                                                                                                                    | N/A   |
| 33 |                                          |             |                                                                                                                                                                                                                                                                                                                                                                                                              |       |
| 34 |                                          |             |                                                                                                                                                                                                                                                                                                                                                                                                              |       |
| 35 |                                          |             |                                                                                                                                                                                                                                                                                                                                                                                                              |       |
| 36 | Blinding (masking)                       | <u>#17a</u> | Who will be blinded after assignment to interventions (eg, trial participants, care providers, outcome assessors, data analysts), and how                                                                                                                                                                                                                                                                    | N/A   |
| 37 |                                          |             |                                                                                                                                                                                                                                                                                                                                                                                                              |       |
| 38 |                                          |             |                                                                                                                                                                                                                                                                                                                                                                                                              |       |
| 39 |                                          |             |                                                                                                                                                                                                                                                                                                                                                                                                              |       |
| 40 |                                          |             |                                                                                                                                                                                                                                                                                                                                                                                                              |       |
| 41 | Blinding (masking): emergency unblinding | <u>#17b</u> | If blinded, circumstances under which unblinding is permissible, and procedure for revealing a participant's allocated intervention during the trial                                                                                                                                                                                                                                                         | N/A   |
| 42 |                                          |             |                                                                                                                                                                                                                                                                                                                                                                                                              |       |
| 43 |                                          |             |                                                                                                                                                                                                                                                                                                                                                                                                              |       |
| 44 |                                          |             |                                                                                                                                                                                                                                                                                                                                                                                                              |       |
| 45 |                                          |             |                                                                                                                                                                                                                                                                                                                                                                                                              |       |
| 46 | Data collection plan                     | <u>#18a</u> | Plans for assessment and collection of outcome, baseline, and other trial data, including any related processes to promote data quality (eg, duplicate measurements, training of assessors) and a description of study instruments (eg, questionnaires, laboratory tests) along with their reliability and validity, if known. Reference to where data collection forms can be found, if not in the protocol | 12    |
| 47 |                                          |             |                                                                                                                                                                                                                                                                                                                                                                                                              |       |
| 48 |                                          |             |                                                                                                                                                                                                                                                                                                                                                                                                              |       |
| 49 |                                          |             |                                                                                                                                                                                                                                                                                                                                                                                                              |       |
| 50 |                                          |             |                                                                                                                                                                                                                                                                                                                                                                                                              |       |
| 51 |                                          |             |                                                                                                                                                                                                                                                                                                                                                                                                              |       |
| 52 |                                          |             |                                                                                                                                                                                                                                                                                                                                                                                                              |       |
| 53 |                                          |             |                                                                                                                                                                                                                                                                                                                                                                                                              |       |
| 54 |                                          |             |                                                                                                                                                                                                                                                                                                                                                                                                              |       |
| 55 |                                          |             |                                                                                                                                                                                                                                                                                                                                                                                                              |       |
| 56 |                                          |             |                                                                                                                                                                                                                                                                                                                                                                                                              |       |
| 57 |                                          |             |                                                                                                                                                                                                                                                                                                                                                                                                              |       |
| 58 |                                          |             |                                                                                                                                                                                                                                                                                                                                                                                                              |       |
| 59 |                                          |             |                                                                                                                                                                                                                                                                                                                                                                                                              |       |
| 60 |                                          |             |                                                                                                                                                                                                                                                                                                                                                                                                              |       |

|    |                        |             |                                                                       |       |
|----|------------------------|-------------|-----------------------------------------------------------------------|-------|
| 1  | Data collection plan:  | <u>#18b</u> | Plans to promote participant retention and complete follow-up,        | N/A   |
| 2  | retention              |             | including list of any outcome data to be collected for participants   |       |
| 3  |                        |             | who discontinue or deviate from intervention protocols                |       |
| 4  |                        |             |                                                                       |       |
| 5  |                        |             |                                                                       |       |
| 6  | Data management        | <u>#19</u>  | Plans for data entry, coding, security, and storage, including any    | 16,17 |
| 7  |                        |             | related processes to promote data quality (eg, double data entry;     |       |
| 8  |                        |             | range checks for data values). Reference to where details of data     |       |
| 9  |                        |             | management procedures can be found, if not in the protocol            |       |
| 10 |                        |             |                                                                       |       |
| 11 |                        |             |                                                                       |       |
| 12 |                        |             |                                                                       |       |
| 13 | Statistics: outcomes   | <u>#20a</u> | Statistical methods for analysing primary and secondary outcomes.     | 13-15 |
| 14 |                        |             | Reference to where other details of the statistical analysis plan can |       |
| 15 |                        |             | be found, if not in the protocol                                      |       |
| 16 |                        |             |                                                                       |       |
| 17 |                        |             |                                                                       |       |
| 18 | Statistics: additional | <u>#20b</u> | Methods for any additional analyses (eg, subgroup and adjusted        | 14,15 |
| 19 | analyses               |             | analyses)                                                             |       |
| 20 |                        |             |                                                                       |       |
| 21 |                        |             |                                                                       |       |
| 22 | Statistics: analysis   | <u>#20c</u> | Definition of analysis population relating to protocol non-           | N/A   |
| 23 | population and         |             | adherence (eg, as randomised analysis), and any statistical           |       |
| 24 | missing data           |             | methods to handle missing data (eg, multiple imputation)              |       |
| 25 |                        |             |                                                                       |       |
| 26 |                        |             |                                                                       |       |
| 27 | Data monitoring:       | <u>#21a</u> | Composition of data monitoring committee (DMC); summary of            | 15    |
| 28 | formal committee       |             | its role and reporting structure; statement of whether it is          |       |
| 29 |                        |             | independent from the sponsor and competing interests; and             |       |
| 30 |                        |             | reference to where further details about its charter can be found, if |       |
| 31 |                        |             | not in the protocol. Alternatively, an explanation of why a DMC is    |       |
| 32 |                        |             | not needed                                                            |       |
| 33 |                        |             |                                                                       |       |
| 34 |                        |             |                                                                       |       |
| 35 |                        |             |                                                                       |       |
| 36 |                        |             |                                                                       |       |
| 37 | Data monitoring:       | <u>#21b</u> | Description of any interim analyses and stopping guidelines,          | 14    |
| 38 | interim analysis       |             | including who will have access to these interim results and make      |       |
| 39 |                        |             | the final decision to terminate the trial                             |       |
| 40 |                        |             |                                                                       |       |
| 41 |                        |             |                                                                       |       |
| 42 |                        |             |                                                                       |       |
| 43 | Harms                  | <u>#22</u>  | Plans for collecting, assessing, reporting, and managing solicited    | 15    |
| 44 |                        |             | and spontaneously reported adverse events and other unintended        |       |
| 45 |                        |             | effects of trial interventions or trial conduct                       |       |
| 46 |                        |             |                                                                       |       |
| 47 |                        |             |                                                                       |       |
| 48 | Auditing               | <u>#23</u>  | Frequency and procedures for auditing trial conduct, if any, and      | N/A   |
| 49 |                        |             | whether the process will be independent from investigators and the    |       |
| 50 |                        |             | sponsor                                                               |       |
| 51 |                        |             |                                                                       |       |
| 52 |                        |             |                                                                       |       |
| 53 | Research ethics        | <u>#24</u>  | Plans for seeking research ethics committee / institutional review    | 16    |
| 54 | approval               |             | board (REC / IRB) approval                                            |       |
| 55 |                        |             |                                                                       |       |
| 56 |                        |             |                                                                       |       |
| 57 | Protocol amendments    | <u>#25</u>  | Plans for communicating important protocol modifications (eg,         | N/A   |
| 58 |                        |             | changes to eligibility criteria, outcomes, analyses) to relevant      |       |
| 59 |                        |             |                                                                       |       |
| 60 |                        |             |                                                                       |       |

|    |                                             |                                                                                                                                                                                                                                                                                                 |       |
|----|---------------------------------------------|-------------------------------------------------------------------------------------------------------------------------------------------------------------------------------------------------------------------------------------------------------------------------------------------------|-------|
| 1  |                                             | parties (eg, investigators, REC / IRBs, trial participants, trial registries, journals, regulators)                                                                                                                                                                                             |       |
| 2  |                                             |                                                                                                                                                                                                                                                                                                 |       |
| 3  |                                             |                                                                                                                                                                                                                                                                                                 |       |
| 4  | Consent or assent                           | <u>#26a</u> Who will obtain informed consent or assent from potential trial participants or authorised surrogates, and how (see Item 32)                                                                                                                                                        | 12,13 |
| 5  |                                             |                                                                                                                                                                                                                                                                                                 |       |
| 6  |                                             |                                                                                                                                                                                                                                                                                                 |       |
| 7  |                                             |                                                                                                                                                                                                                                                                                                 |       |
| 8  | Consent or assent: ancillary studies        | <u>#26b</u> Additional consent provisions for collection and use of participant data and biological specimens in ancillary studies, if applicable                                                                                                                                               | N/A   |
| 9  |                                             |                                                                                                                                                                                                                                                                                                 |       |
| 10 |                                             |                                                                                                                                                                                                                                                                                                 |       |
| 11 | Confidentiality                             | <u>#27</u> How personal information about potential and enrolled participants will be collected, shared, and maintained in order to protect confidentiality before, during, and after the trial                                                                                                 | 16,17 |
| 12 |                                             |                                                                                                                                                                                                                                                                                                 |       |
| 13 |                                             |                                                                                                                                                                                                                                                                                                 |       |
| 14 |                                             |                                                                                                                                                                                                                                                                                                 |       |
| 15 |                                             |                                                                                                                                                                                                                                                                                                 |       |
| 16 |                                             |                                                                                                                                                                                                                                                                                                 |       |
| 17 | Declaration of interests                    | <u>#28</u> Financial and other competing interests for principal investigators for the overall trial and each study site                                                                                                                                                                        | 22    |
| 18 |                                             |                                                                                                                                                                                                                                                                                                 |       |
| 19 |                                             |                                                                                                                                                                                                                                                                                                 |       |
| 20 |                                             |                                                                                                                                                                                                                                                                                                 |       |
| 21 | Data access                                 | <u>#29</u> Statement of who will have access to the final trial dataset, and disclosure of contractual agreements that limit such access for investigators                                                                                                                                      | N/A   |
| 22 |                                             |                                                                                                                                                                                                                                                                                                 |       |
| 23 |                                             |                                                                                                                                                                                                                                                                                                 |       |
| 24 |                                             |                                                                                                                                                                                                                                                                                                 |       |
| 25 |                                             |                                                                                                                                                                                                                                                                                                 |       |
| 26 | Ancillary and post trial care               | <u>#30</u> Provisions, if any, for ancillary and post-trial care, and for compensation to those who suffer harm from trial participation                                                                                                                                                        | 15    |
| 27 |                                             |                                                                                                                                                                                                                                                                                                 |       |
| 28 |                                             |                                                                                                                                                                                                                                                                                                 |       |
| 29 |                                             |                                                                                                                                                                                                                                                                                                 |       |
| 30 | Dissemination policy: trial results         | <u>#31a</u> Plans for investigators and sponsor to communicate trial results to participants, healthcare professionals, the public, and other relevant groups (eg, via publication, reporting in results databases, or other data sharing arrangements), including any publication restrictions | N/A   |
| 31 |                                             |                                                                                                                                                                                                                                                                                                 |       |
| 32 |                                             |                                                                                                                                                                                                                                                                                                 |       |
| 33 |                                             |                                                                                                                                                                                                                                                                                                 |       |
| 34 |                                             |                                                                                                                                                                                                                                                                                                 |       |
| 35 |                                             |                                                                                                                                                                                                                                                                                                 |       |
| 36 |                                             |                                                                                                                                                                                                                                                                                                 |       |
| 37 |                                             |                                                                                                                                                                                                                                                                                                 |       |
| 38 | Dissemination policy: authorship            | <u>#31b</u> Authorship eligibility guidelines and any intended use of professional writers                                                                                                                                                                                                      | N/A   |
| 39 |                                             |                                                                                                                                                                                                                                                                                                 |       |
| 40 |                                             |                                                                                                                                                                                                                                                                                                 |       |
| 41 |                                             |                                                                                                                                                                                                                                                                                                 |       |
| 42 | Dissemination policy: reproducible research | <u>#31c</u> Plans, if any, for granting public access to the full protocol, participant-level dataset, and statistical code                                                                                                                                                                     | N/A   |
| 43 |                                             |                                                                                                                                                                                                                                                                                                 |       |
| 44 |                                             |                                                                                                                                                                                                                                                                                                 |       |
| 45 |                                             |                                                                                                                                                                                                                                                                                                 |       |
| 46 | Informed consent materials                  | <u>#32</u> Model consent form and other related documentation given to participants and authorised surrogates                                                                                                                                                                                   | N/A   |
| 47 |                                             |                                                                                                                                                                                                                                                                                                 |       |
| 48 |                                             |                                                                                                                                                                                                                                                                                                 |       |
| 49 |                                             |                                                                                                                                                                                                                                                                                                 |       |
| 50 | Biological specimens                        | <u>#33</u> Plans for collection, laboratory evaluation, and storage of biological specimens for genetic or molecular analysis in the current trial and for future use in ancillary studies, if applicable                                                                                       | N/A   |
| 51 |                                             |                                                                                                                                                                                                                                                                                                 |       |
| 52 |                                             |                                                                                                                                                                                                                                                                                                 |       |
| 53 |                                             |                                                                                                                                                                                                                                                                                                 |       |
| 54 |                                             |                                                                                                                                                                                                                                                                                                 |       |
| 55 |                                             |                                                                                                                                                                                                                                                                                                 |       |
| 56 |                                             |                                                                                                                                                                                                                                                                                                 |       |
| 57 |                                             |                                                                                                                                                                                                                                                                                                 |       |
| 58 |                                             |                                                                                                                                                                                                                                                                                                 |       |
| 59 |                                             |                                                                                                                                                                                                                                                                                                 |       |
| 60 |                                             |                                                                                                                                                                                                                                                                                                 |       |



# BMJ Open

## Real-time navigation during hepatectomy using fusion indocyanine green-fluorescence imaging: protocol for a prospective cohort study

|                                 |                                                                                                                                                                                                                                                                                                                                                                                                                                                                                                                                                                                                                                                                                                                                                                                                                                   |
|---------------------------------|-----------------------------------------------------------------------------------------------------------------------------------------------------------------------------------------------------------------------------------------------------------------------------------------------------------------------------------------------------------------------------------------------------------------------------------------------------------------------------------------------------------------------------------------------------------------------------------------------------------------------------------------------------------------------------------------------------------------------------------------------------------------------------------------------------------------------------------|
| Journal:                        | <i>BMJ Open</i>                                                                                                                                                                                                                                                                                                                                                                                                                                                                                                                                                                                                                                                                                                                                                                                                                   |
| Manuscript ID                   | bmjopen-2019-030233.R3                                                                                                                                                                                                                                                                                                                                                                                                                                                                                                                                                                                                                                                                                                                                                                                                            |
| Article Type:                   | Protocol                                                                                                                                                                                                                                                                                                                                                                                                                                                                                                                                                                                                                                                                                                                                                                                                                          |
| Date Submitted by the Author:   | 11-Jul-2019                                                                                                                                                                                                                                                                                                                                                                                                                                                                                                                                                                                                                                                                                                                                                                                                                       |
| Complete List of Authors:       | Gon, Hidetoshi; Kobe University Graduate School of Medicine School of Medicine, Surgery;<br>Komatsu, Shohei; Kobe University Graduate School of Medicine School of Medicine<br>Murakami, Sae; Kobe University Hospital,<br>Kido, Masahiro; Kobe University Graduate School of Medicine School of Medicine<br>Tanaka, Motofumi; Kobe University Graduate School of Medicine School of Medicine<br>Kuramitsu, Kaori; Kobe University Graduate School of Medicine School of Medicine<br>Tsugawa, Daisuke; Kobe University Graduate School of Medicine School of Medicine<br>Awazu, Masahide; Kobe University Graduate School of Medicine School of Medicine<br>Toyama, Hirochika; Kobe University Graduate School of Medicine School of Medicine<br>Fukumoto, Takumi; Kobe University Graduate School of Medicine School of Medicine |
| <b>Primary Subject Heading</b>: | Gastroenterology and hepatology                                                                                                                                                                                                                                                                                                                                                                                                                                                                                                                                                                                                                                                                                                                                                                                                   |
| Secondary Subject Heading:      | Gastroenterology and hepatology                                                                                                                                                                                                                                                                                                                                                                                                                                                                                                                                                                                                                                                                                                                                                                                                   |
| Keywords:                       | indocyanine green-fluorescence imaging, liver tumour, hepatectomy                                                                                                                                                                                                                                                                                                                                                                                                                                                                                                                                                                                                                                                                                                                                                                 |
|                                 |                                                                                                                                                                                                                                                                                                                                                                                                                                                                                                                                                                                                                                                                                                                                                                                                                                   |

SCHOLARONE™  
Manuscripts

1  
2  
3  
4 **Real-time navigation during hepatectomy using fusion indocyanine green-fluorescence**  
5  
6  
7 **imaging: protocol for a prospective cohort study**  
8  
9

10  
11  
12  
13 Hidetoshi Gon, MD, PhD<sup>a\*</sup>; Shohei Komatsu, MD, PhD<sup>a\*</sup>; Sae Murakami, MD, PhD<sup>b</sup>;

14  
15  
16 Masahiro Kido, MD, PhD<sup>a</sup>; Motofumi Tanaka, MD, PhD<sup>a</sup>; Kaori Kuramitsu, MD, PhD<sup>a</sup>;

17  
18  
19 Daisuke Tsugawa, MD, PhD<sup>a</sup>; Masahide Awazu, MD, PhD<sup>a</sup>; Hirochika Toyama, MD, PhD<sup>a</sup>;

20  
21  
22 and Takumi Fukumoto, MD, PhD<sup>a</sup>  
23  
24  
25  
26  
27

28 Department of Surgery, Division of Hepato-Biliary-Pancreatic Surgery, Kobe University

29  
30 Graduate School of Medicine<sup>a</sup>, and Clinical and Translational Research Center, Kobe

31  
32  
33 University Hospital<sup>b</sup>, Kobe, Hyogo, Japan  
34  
35  
36

37 \*These authors equally contributed to this work.  
38  
39  
40  
41  
42

43 **Corresponding author:** Hidetoshi Gon, MD, PhD, Department of Surgery, Division of

44  
45  
46 Hepato-Biliary-Pancreatic Surgery, Graduate School of Medicine, Kobe University, 7-5-2

47  
48  
49 Kusunoki-cho, Chuo-ku, Kobe 650-0017, Japan  
50  
51

52 Tel: +81-78-382-6302  
53

54  
55 Fax: +81-78-382-6307  
56

57  
58 E-mail: [hidetoshi541128@gmail.com](mailto:hidetoshi541128@gmail.com)  
59  
60

1  
2  
3  
4 2616 words  
5  
6  
7  
8  
9

10 Keywords: indocyanine green-fluorescence imaging, liver tumour, hepatectomy  
11  
12  
13  
14  
15  
16  
17  
18  
19  
20  
21  
22  
23  
24  
25  
26  
27  
28  
29  
30  
31  
32  
33  
34  
35  
36  
37  
38  
39  
40  
41  
42  
43  
44  
45  
46  
47  
48  
49  
50  
51  
52  
53  
54  
55  
56  
57  
58  
59  
60

For peer review only

## ABSTRACT

**Introduction:** In vivo fluorescence imaging techniques using indocyanine green to identify liver tumours and hepatic segment boundaries have been recently developed. The purpose of this study is to evaluate the efficacy of fusion indocyanine green (ICG)-fluorescence imaging for navigation during hepatectomy.

**Methods and analysis:** This will be an exploratory single-arm clinical trial; patients with liver tumours will undergo hepatectomy using the ICG-fluorescence imaging system. In total, 110 patients with liver tumours scheduled for elective hepatectomy will be included in this study. Preoperatively, ICG will be intravenously injected at a dose of 0.5 mg/kg body weight within 2 days. To detect liver tumours intraoperatively, the hepatic surface will be initially observed using the ICG-fluorescence imaging system. After identifying and clamping the portal pedicle corresponding to the hepatic segments, including the liver tumours to be resected, additional ICG will be injected intravenously at a dose of 0.5 mg/kg body weight to identify the boundaries of the hepatic segments. The primary outcome measure will be the success or failure of the ICG-fluorescence imaging system in identifying hepatic segments. The secondary outcomes will be the success or failure in identifying liver tumours, liver function indicators, operative time, blood loss, rate of postoperative complications, and recurrence-free survival. The findings obtained through this study are expected to help establish the utility of ICG-fluorescence imaging systems and therefore contribute to

1  
2  
3  
4 prognostic outcome improvements in patients undergoing hepatectomy for various causes.  
5  
6

7 **Ethics and dissemination:** The protocol has been approved by the Kobe University Clinical  
8  
9  
10 Research Ethical Committee. The findings of this study will be disseminated widely through  
11  
12  
13 peer-reviewed publications and conference presentations.  
14  
15

16 **Trial registration number:** This study is registered at the UMIN Clinical Trials Registry:  
17  
18 UMIN000031054 and Japan Registry of Clinical Trials: jRCT1051180070. The Registration  
19  
20  
21  
22 Data Set is available at <https://jrct.niph.go.jp/>.  
23  
24  
25  
26  
27  
28  
29  
30  
31  
32  
33  
34  
35  
36  
37  
38  
39  
40  
41  
42  
43  
44  
45  
46  
47  
48  
49  
50  
51  
52  
53  
54  
55  
56  
57  
58  
59  
60

## STRENGTHS AND LIMITATIONS OF THIS STUDY

- This study is expected to address the clinical utility of real-time navigation during hepatectomy using indocyanine green (ICG)-fluorescence imaging systems.
- The efficacy and safety of hepatectomy using ICG-fluorescence imaging systems are expected to be clarified through the analysis of associations between the success rate in identifying hepatic segments and clinical outcomes, including liver function indicators, operative time, blood loss, rate of postoperative complications, and recurrence-free survival.
- This is an exploratory single-arm study, the results of which will be compared against historical data from our facility.

## INTRODUCTION

Hepatectomy remains the mainstay of treatment for hepatocellular carcinoma (HCC) and metastatic liver tumours and is commonly performed in patients with preserved liver function.[1-3] Vascular invasion is a poor prognostic factor in HCC, and anatomical resection of the cancer-bearing portal regions is a theoretically effective procedure for the treatment of HCC and metastatic liver tumours complicated by invasion of the Glisson's capsule.[4]

To perform anatomical resection safely and precisely, the liver's anatomical boundaries must be visually recognized. Particularly, the hepatic veins are considered to indicate the absolute boundaries of hepatic segments and can easily be identified by intraoperative ultrasonography. However, due to the three-dimensional shape of the hepatic segment, the hepatic veins are not sufficient for guiding anatomical resection. Under such conditions, intraoperative navigation in hepatectomy allows for the real-time identification of three-dimensional structures, including tumours and hepatic segment boundaries.

Several techniques for identifying hepatic segments have been reported thus far.[5-9] Recently, in vivo fluorescence imaging techniques for the identification of biological structures intraoperatively have been developed. Among the various fluorophores used, indocyanine green (ICG) receives a substantial amount of attention because of its well-known pharmacokinetic and safety profile, making it a potentially valuable clinical tool.[10] For example, it is well known that ICG rapidly and completely binds to plasma proteins - among

1  
2  
3  
4 which albumin is the principal carrier - following intravenous injection. Also, ICG is excreted  
5  
6  
7 in bile in an unconjugated form and is not cleared by extrahepatic mechanisms. Furthermore,  
8  
9  
10 single or repeated intravenous injections or infusions rarely cause unfavourable adverse  
11  
12  
13 effects. Taking advantage of these characteristics and the development of concomitant  
14  
15  
16 fluorescence imaging techniques, ICG-fluorescence imaging systems are widely used for  
17  
18  
19 detecting sentinel lymph nodes and arterial blood flow, and their effectiveness has been  
20  
21  
22 recognized.[11, 12] Moreover, the potential utility of this approach to identify liver tumours  
23  
24  
25 and hepatic segment boundaries, as well as to detect the bile duct tree intraoperatively, has  
26  
27  
28 recently been demonstrated.[7, 13-19]

31 The ICG-fluorescence imaging system was initially introduced for use during open  
32  
33  
34 hepatectomy. Similar fluorescence imaging systems have been recently developed for use  
35  
36  
37 during laparoscopic hepatobiliary surgery. Several reports have demonstrated the efficacy of  
38  
39  
40 such systems during laparoscopic cholecystectomy and hepatectomy.[20] However, whether  
41  
42  
43 the hepatic boundaries visualised by ICG-fluorescence imaging systems are clinically precise  
44  
45  
46 and useful has not been adequately assessed. For example, there may be minor deviations due  
47  
48  
49 to the confluence of communicating vessel branches between hepatic segments; the injected  
50  
51  
52 ICG likely passes through the hepatic segments and the tumour to be removed. Evidence  
53  
54  
55 regarding the efficacy of ICG-fluorescence imaging systems is not fully established, and  
56  
57  
58 further investigation is required.  
59  
60



1  
2  
3  
4 The purpose of this study is to evaluate the efficacy of the ICG-fluorescence imaging  
5  
6  
7 system during hepatectomy for patients with liver tumours by analysing the rate of detection  
8  
9  
10 of hepatic boundaries and tumours. In addition, we assess the precision of the detected hepatic  
11  
12  
13 boundaries by evaluating the postoperative clinical data.  
14  
15  
16  
17  
18

## 19 **METHODS AND ANALYSIS**

### 21 **Study design**

22  
23  
24  
25 This prospective study is a single-arm, exploratory clinical trial. Patients with liver  
26  
27  
28 tumours will undergo hepatectomy using the ICG-fluorescence imaging system. This study  
29  
30  
31 will be performed at Kobe University.  
32  
33  
34  
35  
36

### 37 **Target population**

38  
39  
40 From 2018 to 2020, patients with liver tumours treated at Kobe University will be  
41  
42  
43 enrolled. The inclusion criteria are as follows: male or female patients with liver tumours,  
44  
45  
46 aged 20 years and older, scheduled for elective hepatectomy, have preserved liver function,  
47  
48  
49 able to understand the nature of the study procedures, and willing to participate and give  
50  
51  
52 voluntary written consent. Liver functional reserve will be assessed by serum biochemical  
53  
54  
55 data (albumin level, total bilirubin level, and prothrombin time) and ICG retention for 15  
56  
57  
58 minutes (ICG-R15). The patients will be categorized according to the severity of liver disease  
59  
60

1  
2  
3  
4 based on Child-Pugh stages and the liver damage classification, defined by the Liver Cancer  
5  
6  
7 Study Group of Japan.[21, 22] Preserved liver function is defined as ICG-R15 <15% and a  
8  
9  
10 Child-Pugh classification of A or B.

11  
12  
13 The exclusion criteria are as follows: has liver or renal insufficiency, or known ICG  
14  
15  
16 hypersensitivity, pregnant or breastfeeding, or unable to understand the nature of the study  
17  
18  
19 procedure.

## 20 21 22 23 24 25 **Intervention**

26  
27  
28 ICG is injected intravenously at a dose of 0.5 mg/kg body weight within 2 days  
29  
30  
31 preoperatively. Intraoperatively, we will initially observe the hepatic surface using a fusion  
32  
33  
34 ICG-fluorescence imaging system (PINPOINT; Stryker, Kalamazoo, MI, US) to detect liver  
35  
36  
37 tumours. Among several methods for identifying liver segments with fluorescence imaging,  
38  
39  
40 we will use the negative staining technique to identify the liver segments in this study.[23]

41  
42  
43 After identifying and clamping the portal pedicle corresponding to the hepatic segments to be  
44  
45  
46 removed, additional ICG is injected intravenously at a dose of 0.5 mg/kg body weight to  
47  
48  
49 identify the boundaries of the hepatic segments.[24] Hepatectomy is performed based on the  
50  
51  
52 demarcation between fluorescing and non-fluorescing areas, which are assumed to be the  
53  
54  
55 boundaries of the hepatic segments. The demarcation will also be checked as continuously as  
56  
57  
58 possible during parenchymal resection. Parenchymal resection will be performed using an  
59  
60

1  
2  
3  
4 ultrasonic surgical aspirator (CUSA; Cavitron Lasersonic Corp., Stamford, CT, USA), and a  
5  
6  
7 bipolar clamp coagulation system (ERBE, Tübingen, Germany). The fusion ICG-fluorescence  
8  
9  
10 images will only be used for the hepatectomy. The Pringle manoeuvre will be performed and  
11  
12  
13 a drainage tube will be routinely inserted around the cut surface of the liver parenchyma.  
14  
15  
16  
17  
18

### 19 **Sample size calculation**

20  
21  
22 The purpose of the primary analysis of this study is to estimate the success rate, which is  
23  
24 defined as the proportion of hepatic segments identified by the ICG-fluorescence imaging  
25  
26 system during hepatectomy. In order to judge the procedure as useful, a success rate of at least  
27  
28 80% is thought to be required. When the expected success rate is 90% and the two-sided 95%  
29  
30 confidence interval width is 0.12, the required number of participants is 98. To allow for an  
31  
32 approximately 10% dropout, the target sample size of this study has been set to 110.  
33  
34  
35  
36  
37  
38  
39  
40  
41  
42

### 43 **Outcome measures**

#### 44 *Primary endpoint*

45  
46  
47  
48 The primary endpoint is the success and failure of identifying hepatic segments using the  
49  
50 ICG-fluorescence imaging system. We will evaluate the identification of hepatic segments at  
51  
52 two points: observation of the liver surface and the hepatic transection surface. We assume  
53  
54 that identification is successful when fulfilling the following two criteria:  
55  
56  
57  
58  
59  
60

1  
2  
3  
4 (1) Hepatic surface  
5  
6

7 Identification of hepatic segments by the ICG-fluorescence imaging system is considered  
8  
9  
10 successful when the demarcation between fluorescing and non-fluorescing areas is consistent  
11  
12  
13 with the ischemic demarcation area observed by clamping the portal pedicle.  
14  
15

16 (2) Hepatic transection surface  
17  
18

19 Hepatic parenchymal resection is performed based on the demarcation between  
20  
21  
22 fluorescing and non-fluorescing areas, which are assumed to be the boundaries of the hepatic  
23  
24  
25 segments. We divide the time taken to perform parenchymal resection into three equal  
26  
27  
28 intervals by reviewing the recorded videos after surgery, and the identification of hepatic  
29  
30  
31 segment boundaries is evaluated at each interval. Identification of hepatic segments is  
32  
33  
34 considered successful when we can identify the hepatic segments in more than 80% of the  
35  
36  
37 transected area during parenchymal resection at more than two intervals.  
38  
39  
40  
41  
42

43 *Secondary endpoints*  
44  
45

46 The secondary endpoints are the success and failure of identifying liver tumours by the  
47  
48  
49 ICG-fluorescence imaging system, liver function indicators (alanine transaminase, albumin,  
50  
51  
52 total bilirubin, international normalized ratio of prothrombin time, platelet count), the  
53  
54  
55 operative time, the blood loss, the rate of postoperative complications, and recurrence-free  
56  
57  
58 survival. Successful identification of liver tumours is determined when any isolated  
59  
60

1  
2  
3  
4 fluorescence signals are detected, also considering liver tumours diagnosed by other  
5  
6  
7 modalities, including preoperative imaging and IOUS, and finally confirmed by pathological  
8  
9  
10 examination. The fluorescence pattern is considered according to the preoperative diagnosis  
11  
12  
13 because liver lesions have differing fluorescence patterns on the basis of their tumour  
14  
15  
16 biology.[25] If we identify lesions with isolated fluorescence signal on fusion-fluorescence  
17  
18  
19 imaging that were not identified by preoperative imaging, we evaluate the lesions by  
20  
21  
22 intraoperative ultrasound sonography, and, if necessary, frozen section biopsies are performed  
23  
24  
25 to determine whether additional hepatectomy is required. The recurrence-free survival is  
26  
27  
28 analysed for each case of liver tumour, including primary liver cancer and liver metastases.  
29  
30  
31 Recurrence-free survival time is defined as the time from enrolment until first recurrence after  
32  
33  
34 the surgical intervention. Patients without recurrence will be censored at the date of last  
35  
36  
37 confirmation of recurrence-free status. Patients lost to follow-up without a diagnosis of  
38  
39  
40 recurrence and those who die will be censored at the date of last confirmation of recurrence-  
41  
42  
43 free status.  
44  
45  
46  
47  
48

### 49 **Data collection**

50  
51  
52 Three experienced surgeons will judge the intraoperative identification of hepatic  
53  
54  
55 segment boundaries. The entire surgical procedure, including ICG-fluorescence imaging, will  
56  
57  
58 be digitally recorded and analysed by an additional expert panel consisting of three highly  
59  
60

1  
2  
3  
4 experienced surgeons, different from those performing the surgeries, to confirm the  
5  
6  
7 identification of hepatic segment boundaries. When we perform an open hepatectomy, the  
8  
9  
10 video will be captured by another surgeon using the scope of a fusion ICG-fluorescence  
11  
12  
13 imaging system. When we perform a laparoscopic hepatectomy, the ICG-fluorescence images  
14  
15  
16 can be accessed through the laparoscope. The success rate of their identification is used as the  
17  
18  
19 end point. A flow chart of the study procedure is presented in Figure 1.  
20  
21

22 Postoperative complications will be graded according to the extended Clavien-Dindo  
23  
24  
25 classification of surgical complications, which was published by the Japan Clinical Oncology  
26  
27  
28 Group and more precisely described in the original criteria of the Clavien-Dindo  
29  
30  
31 classification.[26, 27]  
32  
33

34 Follow-up visits will be carried out at two weeks after hospital discharge, and every  
35  
36  
37 three months thereafter. Follow-up evaluation will be performed using routine blood tests,  
38  
39  
40 including liver function tests, coagulation function tests, serum tumour maker levels  
41  
42  
43 depending on the type of liver tumour, abdominal ultrasonography, and abdominal enhanced  
44  
45  
46 computed tomography.  
47  
48  
49  
50  
51

## 52 **Study timeline**

53

54 Data will be collected from February 2018 to January 2020, and analysis is estimated to  
55  
56  
57 be completed by January 2022.  
58  
59  
60

1  
2  
3  
4 Participants will be informed about the study during their preoperative visit to our  
5  
6  
7 hospital, and will have ample time to consider participation. Possible complications will be  
8  
9  
10 evaluated in the year following the surgery. The schedules of enrolment, interventions, and  
11  
12  
13 assessments are shown in Table 1.  
14  
15  
16  
17  
18

### 19 **Statistical analysis**

20  
21  
22 The analysis populations will include the following three sets. Firstly, the full analysis  
23  
24  
25 set (FAS) will consist of all participants who completed the surgery with navigation by ICG-  
26  
27  
28 fluorescence images and have efficacy data available, excluding those who have missing  
29  
30  
31 baseline data or have had significant protocol violations (e.g., absence of informed consent,  
32  
33  
34 enrolment outside the contract period). Secondly, the per protocol set (PPS) will consist of  
35  
36  
37 the FAS participants completing 1 year of follow-up, excluding those with any significant  
38  
39  
40 protocol violations involving the study method, the inclusion criteria, the exclusion criteria,  
41  
42  
43 and concomitant therapy. Lastly, the safety analysis set (SAS) will consist of the participants  
44  
45  
46 who enrolled in this study and were given at least one dose of ICG.  
47  
48

49 The analysis will be performed after the data lock following completion of study drug  
50  
51  
52 administration to all participants. For all efficacy endpoints, the FAS will be used in the  
53  
54  
55 primary analysis, while the PPS will be used in a reference analysis. Safety will be analysed  
56  
57  
58 using the SAS. The baseline distribution of participant characteristics and summary statistics  
59  
60

1  
2  
3  
4 will be calculated according to group in each analysis population.  
5  
6

7 All statistical analyses will be performed as indicated using JMP software, version  
8  
9  
10 13.0.0 (SAS Institute, Inc., Cary, NC, USA).  
11  
12

13 Interim analyses will not be performed in this study.  
14  
15  
16  
17  
18

19 *Primary outcome*  
20  
21

22 The primary objective of this study is to estimate the success rate, which is defined as the  
23  
24 proportion of hepatic segments identified by the ICG-fluorescence imaging system. The point  
25  
26 estimate of the rate and the 95% confidence interval (CI) will be calculated.  
27  
28  
29  
30  
31  
32  
33

34 *Secondary outcomes*  
35  
36

37 The point estimate and 95% CI of the success rate of tumour detection by the ICG-  
38  
39 fluorescence imaging system will be calculated. For analysis of other secondary outcomes, we  
40  
41 will conduct a test using historical data collected at our facility as the control group. No  
42  
43 multiplicity adjustment will be performed in the analysis of secondary efficacy endpoints. We  
44  
45 will estimate the recurrence-free survival by the Kaplan Meier method. The recurrence-free  
46  
47 survival will also be analysed by univariate COX proportional hazard model for each clinical  
48  
49 variable. Multivariate Cox proportional hazard models will be adopted to analyse the risk  
50  
51 factors of recurrence-free survival. The following variables will be included in the  
52  
53  
54  
55  
56  
57  
58  
59  
60



1  
2  
3  
4 multivariate model: the success or failure of identifying liver segments using the ICG  
5  
6  
7 fluorescence imaging system and other variables for which the p-value is under 0.05 in the  
8  
9  
10 univariate analysis.  
11  
12  
13  
14  
15

### 16 *Safety analysis*

17  
18 The safety endpoint of this study is the frequency of adverse events. A table will be  
19  
20 prepared to summarize the endpoint. For estimation of the rates of adverse events, a two-sided  
21  
22  
23  
24  
25 95% CI will be calculated.  
26  
27  
28  
29  
30

### 31 **Data monitoring**

32  
33  
34 Monitoring will be performed in order to periodically check whether the study is being  
35  
36  
37 conducted safely in accordance with the protocol and whether the data are properly collected.  
38  
39  
40 The following items are reviewed every six months: informed consent, obtained and signed;  
41  
42  
43 participant retention; study implementation system; study safety and data; and study progress.  
44  
45  
46  
47  
48

### 49 **Patient and Public involvement**

50  
51  
52 There was no patient and/or public involvement in planning of this study.  
53  
54  
55  
56  
57

### 58 **ETHICS AND DISSEMINATION**

### **Is there scientific and clinical value in conducting this study?**

Whereas the conventional pedicle clamping method can only detect hepatic boundaries from the hepatic surface, the ICG-fluorescence imaging system can detect both the hepatic surface and transection surface during parenchymal resection. We can evaluate the efficacy and safety of hepatectomy using ICG-fluorescence imaging systems by analysing the association between the success rate of identifying hepatic segments and clinical outcomes. This study will help to determine whether the boundaries detected by ICG-fluorescence imaging systems during hepatectomy are valid and useful.

The findings obtained through this study will help to establish the utility of ICG-fluorescence imaging systems and therefore the study is expected to contribute to the improvement of prognostic outcomes in patients who undergo hepatectomy due to various causes.

### **Ethical approval**

This study was approved by the Kobe University Clinical Research Ethical Committee. Possible protocol amendments will be sent to the Kobe University Clinical Research Ethical Committee.

### **Consideration of participants' human rights, safety, and disadvantages**

1  
2  
3  
4 The principal investigator and sub-investigators will comply with the principals of the  
5  
6  
7 protection of participants' privacy rights. Study personnel will make the utmost effort to  
8  
9  
10 protect the participants' personal information and privacy, and will not divulge any personal  
11  
12  
13 information learned from this study without due reasons, even outside working hours. In this  
14  
15  
16 study, a list of subject identification codes will be prepared to link the subject source data  
17  
18  
19 with the study database or study-related documents. Limited participant information, such as  
20  
21  
22 sex and date of birth, may be used to identify participants or verify the list of subject  
23  
24  
25 identification codes, within the range of all applicable laws and regulations.  
26  
27

28 All effort will be taken to ensure that participants will not be personally identifiable from  
29  
30  
31 publications arising from this study.  
32  
33  
34  
35  
36

### 37 **Foreseeable disadvantages (burdens and risks)**

38  
39

40 The administration of ICG will be the only additional invasive intervention performed in  
41  
42  
43 each patient. ICG administration rarely causes anaphylactic reactions (<1:10,000). Patients  
44  
45  
46 with terminal renal insufficiency seem to be more prone to such an anaphylactic reaction. The  
47  
48  
49 estimated mortality rate due to anaphylactic reaction is reported as <1 per 330,000.[28-31]  
50  
51

52 To minimize the risk of adverse events and disadvantages that may occur in this study,  
53  
54  
55 the inclusion and exclusion criteria have been carefully discussed. All adverse events  
56  
57  
58 occurring in this study will be monitored to ensure that they are within the expected range. If  
59  
60

1  
2  
3  
4 any serious or unexpected adverse events occur, the event will be carefully examined and  
5  
6  
7 reviewed, and necessary countermeasures will be taken. Participation in this study may  
8  
9  
10 require increased hospital visits, test frequency, and blood sampling volume, compared to  
11  
12  
13 routine medical care. In the event of tumour progression, severe organ dysfunction, physical  
14  
15  
16 weakening, etc., during the preoperative treatment or during the waiting period for surgical  
17  
18  
19 resection, the planned surgical resection may not be possible.  
20  
21  
22  
23  
24

## 25 REFERENCES

- 26  
27  
28 1. Fong ZV, Tanabe KK. The clinical management of hepatocellular carcinoma in the  
29  
30 United  
31  
32 States, Europe, and Asia: a comprehensive and evidence-based comparison and review.  
33  
34 Cancer 2014;120:2824-38.  
35  
36  
37  
38  
39
- 40 2. Kopetz S, Chang GJ, Overman MJ, et al. Improved survival in metastatic colorectal  
41  
42 cancer is associated with adoption of hepatic resection and improved chemotherapy. Journal  
43  
44 of clinical oncology : official journal of the American Society of Clinical Oncology  
45  
46 2009;27:3677-83.  
47  
48  
49  
50
- 51 3. Watanabe T, Itabashi M, Shimada Y, et al. Japanese Society for Cancer of the Colon and  
52  
53 Rectum (JSCCR) Guidelines 2014 for treatment of colorectal cancer. International journal  
54  
55 of clinical oncology 2015;20:207-39.  
56  
57  
58  
59  
60

- 1  
2  
3  
4 4. Hasegawa K, Kokudo N, Imamura H, et al. Prognostic impact of anatomic resection for  
5  
6  
7 hepatocellular carcinoma. *Ann Surg* 2005;242:252-9.  
8  
9
- 10 5. Makuuchi M, Hasegawa H, Yamazaki S. Ultrasonically guided subsegmentectomy.  
11  
12  
13 *Surgery, gynecology & obstetrics* 1985;161:346-50.  
14  
15
- 16 6. Takasaki K. Glissonian pedicle transection method for hepatic resection: a new concept of  
17  
18  
19 liver segmentation. *Journal of hepato-biliary-pancreatic surgery* 1998;5:286-91.  
20  
21
- 22 7. Aoki T, Yasuda D, Shimizu Y, et al. Image-guided liver mapping using fluorescence  
23  
24  
25 navigation system with indocyanine green for anatomical hepatic resection. *World J Surg*  
26  
27  
28 2008;32:1763-7.  
29
- 30 8. Ahn KS, Kang KJ, Park TJ, et al. Benefit of systematic segmentectomy of the  
31  
32  
33 hepatocellular carcinoma: revisiting the dye injection method for various portal vein  
34  
35  
36 branches. *Ann Surg* 2013;258:1014-21.  
37  
38
- 39 9. Hallet J, Gayet B, Tsung A, et al. Systematic review of the use of pre-operative simulation  
40  
41  
42 and navigation for hepatectomy: current status and future perspectives. *Journal of hepato-*  
43  
44  
45 *biliary-pancreatic sciences* 2015;22:353-62.  
46  
47
- 48 10. Cherrick GR, Stein SW, Leevy CM, et al. Indocyanine green: observations on its physical  
49  
50  
51 properties, plasma decay, and hepatic extraction. *J Clin Invest* 1960;39:592-600.  
52  
53
- 54 11. Kitai T, Inomoto T, Miwa M, et al. Fluorescence navigation with indocyanine green for  
55  
56  
57 detecting sentinel lymph nodes in breast cancer. *Breast cancer (Tokyo, Japan)*  
58  
59  
60

1  
2  
3  
4 2005;12:211-5.  
5

6  
7 12. Reuthebuch O, Haussler A, Genoni M, et al. Novadaq SPY: intraoperative quality  
8  
9  
10 assessment in off-pump coronary artery bypass grafting. *Chest* 2004;125:418-24.  
11

12  
13 13. Ishizawa T, Fukushima N, Shibahara J, et al. Real-time identification of liver cancers by  
14  
15  
16 using indocyanine green fluorescent imaging. *Cancer* 2009;115:2491-504.  
17

18  
19 14. Gotoh K, Yamada T, Ishikawa O, et al. A novel image-guided surgery of hepatocellular  
20  
21  
22 carcinoma by indocyanine green fluorescence imaging navigation. *Journal of surgical*  
23  
24  
25 oncology 2009;100:75-9.  
26

27  
28 15. Ishizawa T, Bandai Y, Ijichi M, et al. Fluorescent cholangiography illuminating the biliary  
29  
30  
31 tree during laparoscopic cholecystectomy. *The British journal of surgery* 2010;97:1369-77.  
32

33  
34 16. Kaibori M, Ishizaki M, Matsui K, et al. Intraoperative indocyanine green fluorescent  
35  
36  
37 imaging for prevention of bile leakage after hepatic resection. *Surgery* 2011;150:91-8.  
38

39  
40 17. van der Vorst JR, Schaafsma BE, Hutteman M, et al. Near-infrared fluorescence-guided  
41  
42  
43 resection of colorectal liver metastases. *Cancer* 2013;119:3411-8.  
44

45  
46 18. Inoue Y, Arita J, Sakamoto T, et al. Anatomical Liver Resections Guided by 3-  
47  
48  
49 Dimensional Parenchymal Staining Using Fusion Indocyanine Green Fluorescence Imaging.  
50  
51  
52 *Ann Surg* 2015;262:105-11.  
53

54  
55 19. Miyata A, Ishizawa T, Tani K, et al. Reappraisal of a Dye-Staining Technique for  
56  
57  
58 Anatomic Hepatectomy by the Concomitant Use of Indocyanine Green Fluorescence  
59  
60

1  
2  
3  
4 Imaging. *J Am Coll Surg* 2015;221:e27-36.  
5

6  
7 20. Spinoglio G, Priora F, Bianchi PP, et al. Real-time near-infrared (NIR) fluorescent  
8  
9  
10 cholangiography in single-site robotic cholecystectomy (SSRC): a single-institutional  
11  
12  
13 prospective study. *Surg Endosc* 2013;27:2156-62.  
14

15  
16 21. Pugh RN, Murray-Lyon IM, Dawson JL, et al. *Br J Surg* 1973 Aug;60:646-9.  
17

18  
19 22. The liver Cancer Study Group of Japan. The General Rules of the Clinical and  
20  
21  
22 Pathological Study of Primary Liver Cancer. 3rd ed. Tokyo: Kanehara; 2010, 1-110  
23

24  
25 23. Kobayashi Y, Kawaguchi Y, Kobayashi K, et al. Portal vein territory identification using  
26  
27  
28 indocyanine green fluorescence imaging: Technical details and short-term outcomes. *J Surg*  
29  
30  
31 *Oncol.* 2017;116:921-31.  
32

33  
34 24. Uchiyama K, Ueno M, Ozawa S, et al. Combined intraoperative use of contrast-enhanced  
35  
36  
37 ultrasonography imaging using a sonazoid and fluorescence navigation system with  
38  
39  
40 indocyanine green during anatomical hepatectomy. *Langenbecks Arch Surg.* 2011;396:1101-  
41  
42  
43 7.  
44

45  
46 25. Abo T, Nanashima A, Tobinaga S, et al. Usefulness of intraoperative diagnosis of hepatic  
47  
48  
49 tumors located at the liver surface and hepatic segmental visualization using indocyanine  
50  
51  
52 green-photodynamic eye imaging. *Eur J Surg Oncol.* 2015;41:257-64.  
53

54  
55 26. Dindo D, Demartines N, Clavien P-A. Classification of Surgical Complications. *Annals of*  
56  
57  
58 *Surgery* 2004;240:205-13.  
59  
60

- 1  
2  
3  
4 27. Katayama H, Kurokawa Y, Nakamura K, et al. Extended Clavien-Dindo classification of  
5  
6  
7 surgical complications: Japan Clinical Oncology Group postoperative complications criteria.  
8  
9  
10 Surg Today 2016;46:668-85.  
11  
12  
13 28. Benya R, Quintana J, Brundage B. Adverse reactions to indocyanine green: a case report  
14  
15  
16 and a review of the literature. Catheterization and cardiovascular diagnosis 1989;17:231-3.  
17  
18  
19 29. Wolf S, Arend O, Schulte K, et al. Severe anaphylactic reaction after indocyanine green  
20  
21  
22 fluorescence angiography. American journal of ophthalmology 1992;114:638-9.  
23  
24  
25 30. Hope-Ross M, Yannuzzi LA, Gragoudas ES, et al. Adverse reactions due to indocyanine  
26  
27  
28 green. Ophthalmology 1994;101:529-33.  
29  
30  
31 31. van den Bos J, Schols RM, Luyer MD, et al. Near-infrared fluorescence cholangiography  
32  
33  
34 assisted laparoscopic cholecystectomy versus conventional laparoscopic cholecystectomy  
35  
36  
37 (FALCON trial): study protocol for a multicentre randomised controlled trial. BMJ open  
38  
39  
40 2016;6:e011668.  
41  
42  
43  
44  
45

#### 46 **AUTHOR STATEMENT**

47  
48  
49 H. Gon, S. Komatsu, S. Murakami, M. Kido, M. Tanaka, K. Kuramitsu, D. Tsugawa, M.  
50  
51  
52 Awazu, H. Toyama, and T. Fukumoto all made substantial contributions to the conception  
53  
54  
55 and design of the study. H. Gon, S. Komatsu, and S. Murakami drafted the manuscript. All  
56  
57  
58 authors provided critical review and final approval of the present manuscript.  
59  
60



## FUNDING STATEMENT

This research received no specific grant from any funding agency in the public, commercial, or not-for-profit sectors.

## DATA SHARING STATEMENT

This is a research protocol. That means the data for this study are being collected currently. All authors have access to these data, and these data will be published as described in the protocol, coordinated by H. Gon and S. Komatsu.

## COMPETING INTERESTS STATEMENT

None declared.

## FIGURE LEGENDS

**Figure 1.** Flowchart of the study procedures. ICG, indocyanine green.

Table 1. Schedule of enrolment, interventions, and assessments.

| <b>STUDY PERIOD</b>                |                                    |                |                |               |                  |                                |
|------------------------------------|------------------------------------|----------------|----------------|---------------|------------------|--------------------------------|
|                                    | Within 14 days before registration | Before surgery | Day of surgery | After surgery | Day of discharge | Every 3 months after discharge |
| <b>ENROLMENT</b>                   |                                    |                |                |               |                  |                                |
| Eligibility screen                 | X                                  |                |                |               |                  |                                |
| Informed consent                   | X                                  |                |                |               |                  |                                |
| Background Blood test              | X                                  |                |                |               |                  |                                |
| <b>INTERVENTIONS</b>               |                                    |                |                |               |                  |                                |
| ICG-fluorescence imaging technique |                                    |                | X              |               |                  |                                |
| <b>ASSESSMENTS</b>                 |                                    |                |                |               |                  |                                |
| Primary outcome                    |                                    |                | X              | X             |                  |                                |
| Blood test                         |                                    | X              | X              | X             | X                | X                              |
| Postoperative complication         |                                    |                | X              | X             | X                |                                |
| Adverse event                      |                                    |                | X              | X             | X                |                                |
| Abdominal ultrasonography          |                                    |                |                |               |                  | X                              |
| Abdominal enhanced CT              |                                    |                |                |               |                  | X                              |

CT, computed tomography; ICG, indocyanine green.

1  
2  
3  
4  
5  
6  
7  
8  
9  
10  
11  
12  
13  
14  
15  
16  
17  
18  
19  
20  
21  
22  
23  
24  
25  
26  
27  
28  
29  
30  
31  
32  
33  
34  
35  
36  
37  
38  
39  
40  
41  
42  
43  
44  
45  
46  
47  
48  
49  
50  
51  
52  
53  
54  
55  
56  
57  
58  
59  
60



**Figure 1.** Flowchart of the study procedures.

Figure 1

1200x900mm (96 x 96 DPI)

# Reporting checklist for protocol of a clinical trial.

Based on the SPIRIT guidelines.

|                                                         |            | Reporting Item                                                                                                                                                                                                                                                                           | Page Number |
|---------------------------------------------------------|------------|------------------------------------------------------------------------------------------------------------------------------------------------------------------------------------------------------------------------------------------------------------------------------------------|-------------|
| Title                                                   | <u>#1</u>  | Descriptive title identifying the study design, population, interventions, and, if applicable, trial acronym                                                                                                                                                                             | 1           |
| Trial registration                                      | <u>#2a</u> | Trial identifier and registry name. If not yet registered, name of intended registry                                                                                                                                                                                                     | 4           |
| Trial registration: data set                            | <u>#2b</u> | All items from the World Health Organization Trial Registration Data Set                                                                                                                                                                                                                 | 4           |
| Protocol version                                        | <u>#3</u>  | Date and version identifier                                                                                                                                                                                                                                                              | 4           |
| Funding                                                 | <u>#4</u>  | Sources and types of financial, material, and other support                                                                                                                                                                                                                              | 22          |
| Roles and responsibilities: contributorship             | <u>#5a</u> | Names, affiliations, and roles of protocol contributors                                                                                                                                                                                                                                  | 21,22       |
| Roles and responsibilities: sponsor contact information | <u>#5b</u> | Name and contact information for the trial sponsor                                                                                                                                                                                                                                       | N/A         |
| Roles and responsibilities: sponsor and funder          | <u>#5c</u> | Role of study sponsor and funders, if any, in study design; collection, management, analysis, and interpretation of data; writing of the report; and the decision to submit the report for publication, including whether they will have ultimate authority over any of these activities | N/A         |
| Roles and responsibilities: committees                  | <u>#5d</u> | Composition, roles, and responsibilities of the coordinating centre, steering committee, endpoint adjudication committee, data management team, and other individuals or groups overseeing the trial, if applicable (see Item 21a for data monitoring committee)                         | N/A         |

|    |                      |             |                                                                     |       |
|----|----------------------|-------------|---------------------------------------------------------------------|-------|
| 1  | Background and       | <u>#6a</u>  | Description of research question and justification for undertaking  | 6-8   |
| 2  | rationale            |             | the trial, including summary of relevant studies (published and     |       |
| 3  |                      |             | unpublished) examining benefits and harms for each intervention     |       |
| 4  |                      |             |                                                                     |       |
| 5  |                      |             |                                                                     |       |
| 6  | Background and       | <u>#6b</u>  | Explanation for choice of comparators                               | N/A   |
| 7  | rationale: choice of |             |                                                                     |       |
| 8  | comparators          |             |                                                                     |       |
| 9  |                      |             |                                                                     |       |
| 10 |                      |             |                                                                     |       |
| 11 | Objectives           | <u>#7</u>   | Specific objectives or hypotheses                                   | 8     |
| 12 |                      |             |                                                                     |       |
| 13 |                      |             |                                                                     |       |
| 14 | Trial design         | <u>#8</u>   | Description of trial design including type of trial (eg, parallel   | 8     |
| 15 |                      |             | group, crossover, factorial, single group), allocation ratio, and   |       |
| 16 |                      |             | framework (eg, superiority, equivalence, non-inferiority,           |       |
| 17 |                      |             | exploratory)                                                        |       |
| 18 |                      |             |                                                                     |       |
| 19 |                      |             |                                                                     |       |
| 20 |                      |             |                                                                     |       |
| 21 | Study setting        | <u>#9</u>   | Description of study settings (eg, community clinic, academic       | 8     |
| 22 |                      |             | hospital) and list of countries where data will be collected.       |       |
| 23 |                      |             | Reference to where list of study sites can be obtained              |       |
| 24 |                      |             |                                                                     |       |
| 25 |                      |             |                                                                     |       |
| 26 | Eligibility criteria | <u>#10</u>  | Inclusion and exclusion criteria for participants. If applicable,   | 8,9   |
| 27 |                      |             | eligibility criteria for study centres and individuals who will     |       |
| 28 |                      |             | perform the interventions (eg, surgeons, psychotherapists)          |       |
| 29 |                      |             |                                                                     |       |
| 30 |                      |             |                                                                     |       |
| 31 | Interventions:       | <u>#11a</u> | Interventions for each group with sufficient detail to allow        | 9     |
| 32 | description          |             | replication, including how and when they will be administered       |       |
| 33 |                      |             |                                                                     |       |
| 34 |                      |             |                                                                     |       |
| 35 | Interventions:       | <u>#11b</u> | Criteria for discontinuing or modifying allocated interventions for | 16    |
| 36 | modifications        |             | a given trial participant (eg, drug dose change in response to      |       |
| 37 |                      |             | harms, participant request, or improving / worsening disease)       |       |
| 38 |                      |             |                                                                     |       |
| 39 |                      |             |                                                                     |       |
| 40 | Interventions:       | <u>#11c</u> | Strategies to improve adherence to intervention protocols, and any  | N/A   |
| 41 | adherence            |             | procedures for monitoring adherence (eg, drug tablet return;        |       |
| 42 |                      |             | laboratory tests)                                                   |       |
| 43 |                      |             |                                                                     |       |
| 44 |                      |             |                                                                     |       |
| 45 | Interventions:       | <u>#11d</u> | Relevant concomitant care and interventions that are permitted or   | N/A   |
| 46 | concomitant care     |             | prohibited during the trial                                         |       |
| 47 |                      |             |                                                                     |       |
| 48 |                      |             |                                                                     |       |
| 49 | Outcomes             | <u>#12</u>  | Primary, secondary, and other outcomes, including the specific      | 10,11 |
| 50 |                      |             | measurement variable (eg, systolic blood pressure), analysis metric |       |
| 51 |                      |             | (eg, change from baseline, final value, time to event), method of   |       |
| 52 |                      |             | aggregation (eg, median, proportion), and time point for each       |       |
| 53 |                      |             | outcome. Explanation of the clinical relevance of chosen efficacy   |       |
| 54 |                      |             | and harm outcomes is strongly recommended                           |       |
| 55 |                      |             |                                                                     |       |
| 56 |                      |             |                                                                     |       |
| 57 |                      |             |                                                                     |       |
| 58 |                      |             |                                                                     |       |
| 59 |                      |             |                                                                     |       |
| 60 |                      |             |                                                                     |       |

|    |                                          |             |                                                                                                                                                                                                                                                                                                                                                                                                              |       |
|----|------------------------------------------|-------------|--------------------------------------------------------------------------------------------------------------------------------------------------------------------------------------------------------------------------------------------------------------------------------------------------------------------------------------------------------------------------------------------------------------|-------|
| 1  | Participant timeline                     | <u>#13</u>  | Time schedule of enrolment, interventions (including any run-ins and washouts), assessments, and visits for participants. A schematic diagram is highly recommended (see Figure)                                                                                                                                                                                                                             | 12,13 |
| 2  |                                          |             |                                                                                                                                                                                                                                                                                                                                                                                                              |       |
| 3  |                                          |             |                                                                                                                                                                                                                                                                                                                                                                                                              |       |
| 4  |                                          |             |                                                                                                                                                                                                                                                                                                                                                                                                              |       |
| 5  |                                          |             |                                                                                                                                                                                                                                                                                                                                                                                                              |       |
| 6  | Sample size                              | <u>#14</u>  | Estimated number of participants needed to achieve study objectives and how it was determined, including clinical and statistical assumptions supporting any sample size calculations                                                                                                                                                                                                                        | 10    |
| 7  |                                          |             |                                                                                                                                                                                                                                                                                                                                                                                                              |       |
| 8  |                                          |             |                                                                                                                                                                                                                                                                                                                                                                                                              |       |
| 9  |                                          |             |                                                                                                                                                                                                                                                                                                                                                                                                              |       |
| 10 |                                          |             |                                                                                                                                                                                                                                                                                                                                                                                                              |       |
| 11 | Recruitment                              | <u>#15</u>  | Strategies for achieving adequate participant enrolment to reach target sample size                                                                                                                                                                                                                                                                                                                          | 10    |
| 12 |                                          |             |                                                                                                                                                                                                                                                                                                                                                                                                              |       |
| 13 |                                          |             |                                                                                                                                                                                                                                                                                                                                                                                                              |       |
| 14 |                                          |             |                                                                                                                                                                                                                                                                                                                                                                                                              |       |
| 15 | Allocation: sequence generation          | <u>#16a</u> | Method of generating the allocation sequence (eg, computer-generated random numbers), and list of any factors for stratification. To reduce predictability of a random sequence, details of any planned restriction (eg, blocking) should be provided in a separate document that is unavailable to those who enrol participants or assign interventions                                                     | N/A   |
| 16 |                                          |             |                                                                                                                                                                                                                                                                                                                                                                                                              |       |
| 17 |                                          |             |                                                                                                                                                                                                                                                                                                                                                                                                              |       |
| 18 |                                          |             |                                                                                                                                                                                                                                                                                                                                                                                                              |       |
| 19 |                                          |             |                                                                                                                                                                                                                                                                                                                                                                                                              |       |
| 20 |                                          |             |                                                                                                                                                                                                                                                                                                                                                                                                              |       |
| 21 |                                          |             |                                                                                                                                                                                                                                                                                                                                                                                                              |       |
| 22 |                                          |             |                                                                                                                                                                                                                                                                                                                                                                                                              |       |
| 23 |                                          |             |                                                                                                                                                                                                                                                                                                                                                                                                              |       |
| 24 |                                          |             |                                                                                                                                                                                                                                                                                                                                                                                                              |       |
| 25 | Allocation concealment mechanism         | <u>#16b</u> | Mechanism of implementing the allocation sequence (eg, central telephone; sequentially numbered, opaque, sealed envelopes), describing any steps to conceal the sequence until interventions are assigned                                                                                                                                                                                                    | N/A   |
| 26 |                                          |             |                                                                                                                                                                                                                                                                                                                                                                                                              |       |
| 27 |                                          |             |                                                                                                                                                                                                                                                                                                                                                                                                              |       |
| 28 |                                          |             |                                                                                                                                                                                                                                                                                                                                                                                                              |       |
| 29 |                                          |             |                                                                                                                                                                                                                                                                                                                                                                                                              |       |
| 30 |                                          |             |                                                                                                                                                                                                                                                                                                                                                                                                              |       |
| 31 |                                          |             |                                                                                                                                                                                                                                                                                                                                                                                                              |       |
| 32 | Allocation: implementation               | <u>#16c</u> | Who will generate the allocation sequence, who will enrol participants, and who will assign participants to interventions                                                                                                                                                                                                                                                                                    | N/A   |
| 33 |                                          |             |                                                                                                                                                                                                                                                                                                                                                                                                              |       |
| 34 |                                          |             |                                                                                                                                                                                                                                                                                                                                                                                                              |       |
| 35 |                                          |             |                                                                                                                                                                                                                                                                                                                                                                                                              |       |
| 36 | Blinding (masking)                       | <u>#17a</u> | Who will be blinded after assignment to interventions (eg, trial participants, care providers, outcome assessors, data analysts), and how                                                                                                                                                                                                                                                                    | N/A   |
| 37 |                                          |             |                                                                                                                                                                                                                                                                                                                                                                                                              |       |
| 38 |                                          |             |                                                                                                                                                                                                                                                                                                                                                                                                              |       |
| 39 |                                          |             |                                                                                                                                                                                                                                                                                                                                                                                                              |       |
| 40 |                                          |             |                                                                                                                                                                                                                                                                                                                                                                                                              |       |
| 41 | Blinding (masking): emergency unblinding | <u>#17b</u> | If blinded, circumstances under which unblinding is permissible, and procedure for revealing a participant's allocated intervention during the trial                                                                                                                                                                                                                                                         | N/A   |
| 42 |                                          |             |                                                                                                                                                                                                                                                                                                                                                                                                              |       |
| 43 |                                          |             |                                                                                                                                                                                                                                                                                                                                                                                                              |       |
| 44 |                                          |             |                                                                                                                                                                                                                                                                                                                                                                                                              |       |
| 45 |                                          |             |                                                                                                                                                                                                                                                                                                                                                                                                              |       |
| 46 | Data collection plan                     | <u>#18a</u> | Plans for assessment and collection of outcome, baseline, and other trial data, including any related processes to promote data quality (eg, duplicate measurements, training of assessors) and a description of study instruments (eg, questionnaires, laboratory tests) along with their reliability and validity, if known. Reference to where data collection forms can be found, if not in the protocol | 12    |
| 47 |                                          |             |                                                                                                                                                                                                                                                                                                                                                                                                              |       |
| 48 |                                          |             |                                                                                                                                                                                                                                                                                                                                                                                                              |       |
| 49 |                                          |             |                                                                                                                                                                                                                                                                                                                                                                                                              |       |
| 50 |                                          |             |                                                                                                                                                                                                                                                                                                                                                                                                              |       |
| 51 |                                          |             |                                                                                                                                                                                                                                                                                                                                                                                                              |       |
| 52 |                                          |             |                                                                                                                                                                                                                                                                                                                                                                                                              |       |
| 53 |                                          |             |                                                                                                                                                                                                                                                                                                                                                                                                              |       |
| 54 |                                          |             |                                                                                                                                                                                                                                                                                                                                                                                                              |       |
| 55 |                                          |             |                                                                                                                                                                                                                                                                                                                                                                                                              |       |
| 56 |                                          |             |                                                                                                                                                                                                                                                                                                                                                                                                              |       |
| 57 |                                          |             |                                                                                                                                                                                                                                                                                                                                                                                                              |       |
| 58 |                                          |             |                                                                                                                                                                                                                                                                                                                                                                                                              |       |
| 59 |                                          |             |                                                                                                                                                                                                                                                                                                                                                                                                              |       |
| 60 |                                          |             |                                                                                                                                                                                                                                                                                                                                                                                                              |       |

|    |                        |             |                                                                       |       |
|----|------------------------|-------------|-----------------------------------------------------------------------|-------|
| 1  | Data collection plan:  | <u>#18b</u> | Plans to promote participant retention and complete follow-up,        | N/A   |
| 2  | retention              |             | including list of any outcome data to be collected for participants   |       |
| 3  |                        |             | who discontinue or deviate from intervention protocols                |       |
| 4  |                        |             |                                                                       |       |
| 5  |                        |             |                                                                       |       |
| 6  | Data management        | <u>#19</u>  | Plans for data entry, coding, security, and storage, including any    | 16,17 |
| 7  |                        |             | related processes to promote data quality (eg, double data entry;     |       |
| 8  |                        |             | range checks for data values). Reference to where details of data     |       |
| 9  |                        |             | management procedures can be found, if not in the protocol            |       |
| 10 |                        |             |                                                                       |       |
| 11 |                        |             |                                                                       |       |
| 12 |                        |             |                                                                       |       |
| 13 | Statistics: outcomes   | <u>#20a</u> | Statistical methods for analysing primary and secondary outcomes.     | 13-15 |
| 14 |                        |             | Reference to where other details of the statistical analysis plan can |       |
| 15 |                        |             | be found, if not in the protocol                                      |       |
| 16 |                        |             |                                                                       |       |
| 17 |                        |             |                                                                       |       |
| 18 | Statistics: additional | <u>#20b</u> | Methods for any additional analyses (eg, subgroup and adjusted        | 14,15 |
| 19 | analyses               |             | analyses)                                                             |       |
| 20 |                        |             |                                                                       |       |
| 21 |                        |             |                                                                       |       |
| 22 | Statistics: analysis   | <u>#20c</u> | Definition of analysis population relating to protocol non-           | N/A   |
| 23 | population and         |             | adherence (eg, as randomised analysis), and any statistical           |       |
| 24 | missing data           |             | methods to handle missing data (eg, multiple imputation)              |       |
| 25 |                        |             |                                                                       |       |
| 26 |                        |             |                                                                       |       |
| 27 | Data monitoring:       | <u>#21a</u> | Composition of data monitoring committee (DMC); summary of            | 15    |
| 28 | formal committee       |             | its role and reporting structure; statement of whether it is          |       |
| 29 |                        |             | independent from the sponsor and competing interests; and             |       |
| 30 |                        |             | reference to where further details about its charter can be found, if |       |
| 31 |                        |             | not in the protocol. Alternatively, an explanation of why a DMC is    |       |
| 32 |                        |             | not needed                                                            |       |
| 33 |                        |             |                                                                       |       |
| 34 |                        |             |                                                                       |       |
| 35 |                        |             |                                                                       |       |
| 36 |                        |             |                                                                       |       |
| 37 | Data monitoring:       | <u>#21b</u> | Description of any interim analyses and stopping guidelines,          | 14    |
| 38 | interim analysis       |             | including who will have access to these interim results and make      |       |
| 39 |                        |             | the final decision to terminate the trial                             |       |
| 40 |                        |             |                                                                       |       |
| 41 |                        |             |                                                                       |       |
| 42 |                        |             |                                                                       |       |
| 43 | Harms                  | <u>#22</u>  | Plans for collecting, assessing, reporting, and managing solicited    | 15    |
| 44 |                        |             | and spontaneously reported adverse events and other unintended        |       |
| 45 |                        |             | effects of trial interventions or trial conduct                       |       |
| 46 |                        |             |                                                                       |       |
| 47 |                        |             |                                                                       |       |
| 48 | Auditing               | <u>#23</u>  | Frequency and procedures for auditing trial conduct, if any, and      | N/A   |
| 49 |                        |             | whether the process will be independent from investigators and the    |       |
| 50 |                        |             | sponsor                                                               |       |
| 51 |                        |             |                                                                       |       |
| 52 |                        |             |                                                                       |       |
| 53 | Research ethics        | <u>#24</u>  | Plans for seeking research ethics committee / institutional review    | 16    |
| 54 | approval               |             | board (REC / IRB) approval                                            |       |
| 55 |                        |             |                                                                       |       |
| 56 |                        |             |                                                                       |       |
| 57 | Protocol amendments    | <u>#25</u>  | Plans for communicating important protocol modifications (eg,         | N/A   |
| 58 |                        |             | changes to eligibility criteria, outcomes, analyses) to relevant      |       |
| 59 |                        |             |                                                                       |       |
| 60 |                        |             |                                                                       |       |

|    |                                             |                                                                                                                                                                                                                                                                                                 |       |
|----|---------------------------------------------|-------------------------------------------------------------------------------------------------------------------------------------------------------------------------------------------------------------------------------------------------------------------------------------------------|-------|
| 1  |                                             | parties (eg, investigators, REC / IRBs, trial participants, trial registries, journals, regulators)                                                                                                                                                                                             |       |
| 2  |                                             |                                                                                                                                                                                                                                                                                                 |       |
| 3  |                                             |                                                                                                                                                                                                                                                                                                 |       |
| 4  | Consent or assent                           | <u>#26a</u> Who will obtain informed consent or assent from potential trial participants or authorised surrogates, and how (see Item 32)                                                                                                                                                        | 12,13 |
| 5  |                                             |                                                                                                                                                                                                                                                                                                 |       |
| 6  |                                             |                                                                                                                                                                                                                                                                                                 |       |
| 7  |                                             |                                                                                                                                                                                                                                                                                                 |       |
| 8  | Consent or assent: ancillary studies        | <u>#26b</u> Additional consent provisions for collection and use of participant data and biological specimens in ancillary studies, if applicable                                                                                                                                               | N/A   |
| 9  |                                             |                                                                                                                                                                                                                                                                                                 |       |
| 10 |                                             |                                                                                                                                                                                                                                                                                                 |       |
| 11 | Confidentiality                             | <u>#27</u> How personal information about potential and enrolled participants will be collected, shared, and maintained in order to protect confidentiality before, during, and after the trial                                                                                                 | 16,17 |
| 12 |                                             |                                                                                                                                                                                                                                                                                                 |       |
| 13 |                                             |                                                                                                                                                                                                                                                                                                 |       |
| 14 |                                             |                                                                                                                                                                                                                                                                                                 |       |
| 15 |                                             |                                                                                                                                                                                                                                                                                                 |       |
| 16 |                                             |                                                                                                                                                                                                                                                                                                 |       |
| 17 | Declaration of interests                    | <u>#28</u> Financial and other competing interests for principal investigators for the overall trial and each study site                                                                                                                                                                        | 22    |
| 18 |                                             |                                                                                                                                                                                                                                                                                                 |       |
| 19 |                                             |                                                                                                                                                                                                                                                                                                 |       |
| 20 |                                             |                                                                                                                                                                                                                                                                                                 |       |
| 21 | Data access                                 | <u>#29</u> Statement of who will have access to the final trial dataset, and disclosure of contractual agreements that limit such access for investigators                                                                                                                                      | N/A   |
| 22 |                                             |                                                                                                                                                                                                                                                                                                 |       |
| 23 |                                             |                                                                                                                                                                                                                                                                                                 |       |
| 24 |                                             |                                                                                                                                                                                                                                                                                                 |       |
| 25 |                                             |                                                                                                                                                                                                                                                                                                 |       |
| 26 | Ancillary and post trial care               | <u>#30</u> Provisions, if any, for ancillary and post-trial care, and for compensation to those who suffer harm from trial participation                                                                                                                                                        | 15    |
| 27 |                                             |                                                                                                                                                                                                                                                                                                 |       |
| 28 |                                             |                                                                                                                                                                                                                                                                                                 |       |
| 29 |                                             |                                                                                                                                                                                                                                                                                                 |       |
| 30 | Dissemination policy: trial results         | <u>#31a</u> Plans for investigators and sponsor to communicate trial results to participants, healthcare professionals, the public, and other relevant groups (eg, via publication, reporting in results databases, or other data sharing arrangements), including any publication restrictions | N/A   |
| 31 |                                             |                                                                                                                                                                                                                                                                                                 |       |
| 32 |                                             |                                                                                                                                                                                                                                                                                                 |       |
| 33 |                                             |                                                                                                                                                                                                                                                                                                 |       |
| 34 |                                             |                                                                                                                                                                                                                                                                                                 |       |
| 35 |                                             |                                                                                                                                                                                                                                                                                                 |       |
| 36 |                                             |                                                                                                                                                                                                                                                                                                 |       |
| 37 |                                             |                                                                                                                                                                                                                                                                                                 |       |
| 38 | Dissemination policy: authorship            | <u>#31b</u> Authorship eligibility guidelines and any intended use of professional writers                                                                                                                                                                                                      | N/A   |
| 39 |                                             |                                                                                                                                                                                                                                                                                                 |       |
| 40 |                                             |                                                                                                                                                                                                                                                                                                 |       |
| 41 |                                             |                                                                                                                                                                                                                                                                                                 |       |
| 42 | Dissemination policy: reproducible research | <u>#31c</u> Plans, if any, for granting public access to the full protocol, participant-level dataset, and statistical code                                                                                                                                                                     | N/A   |
| 43 |                                             |                                                                                                                                                                                                                                                                                                 |       |
| 44 |                                             |                                                                                                                                                                                                                                                                                                 |       |
| 45 |                                             |                                                                                                                                                                                                                                                                                                 |       |
| 46 | Informed consent materials                  | <u>#32</u> Model consent form and other related documentation given to participants and authorised surrogates                                                                                                                                                                                   | N/A   |
| 47 |                                             |                                                                                                                                                                                                                                                                                                 |       |
| 48 |                                             |                                                                                                                                                                                                                                                                                                 |       |
| 49 |                                             |                                                                                                                                                                                                                                                                                                 |       |
| 50 | Biological specimens                        | <u>#33</u> Plans for collection, laboratory evaluation, and storage of biological specimens for genetic or molecular analysis in the current trial and for future use in ancillary studies, if applicable                                                                                       | N/A   |
| 51 |                                             |                                                                                                                                                                                                                                                                                                 |       |
| 52 |                                             |                                                                                                                                                                                                                                                                                                 |       |
| 53 |                                             |                                                                                                                                                                                                                                                                                                 |       |
| 54 |                                             |                                                                                                                                                                                                                                                                                                 |       |
| 55 |                                             |                                                                                                                                                                                                                                                                                                 |       |
| 56 |                                             |                                                                                                                                                                                                                                                                                                 |       |
| 57 |                                             |                                                                                                                                                                                                                                                                                                 |       |
| 58 |                                             |                                                                                                                                                                                                                                                                                                 |       |
| 59 |                                             |                                                                                                                                                                                                                                                                                                 |       |
| 60 |                                             |                                                                                                                                                                                                                                                                                                 |       |
